# Supplementary material for: Comparative Metabolomic Analysis of the Nutritional Aspects from Ten Cultivars of the Strawberry Fruit
Source: MDPI journal article supplement (doi:10.3390/foods12061153), 2023-03-09
Supplement: s1 [file s1]

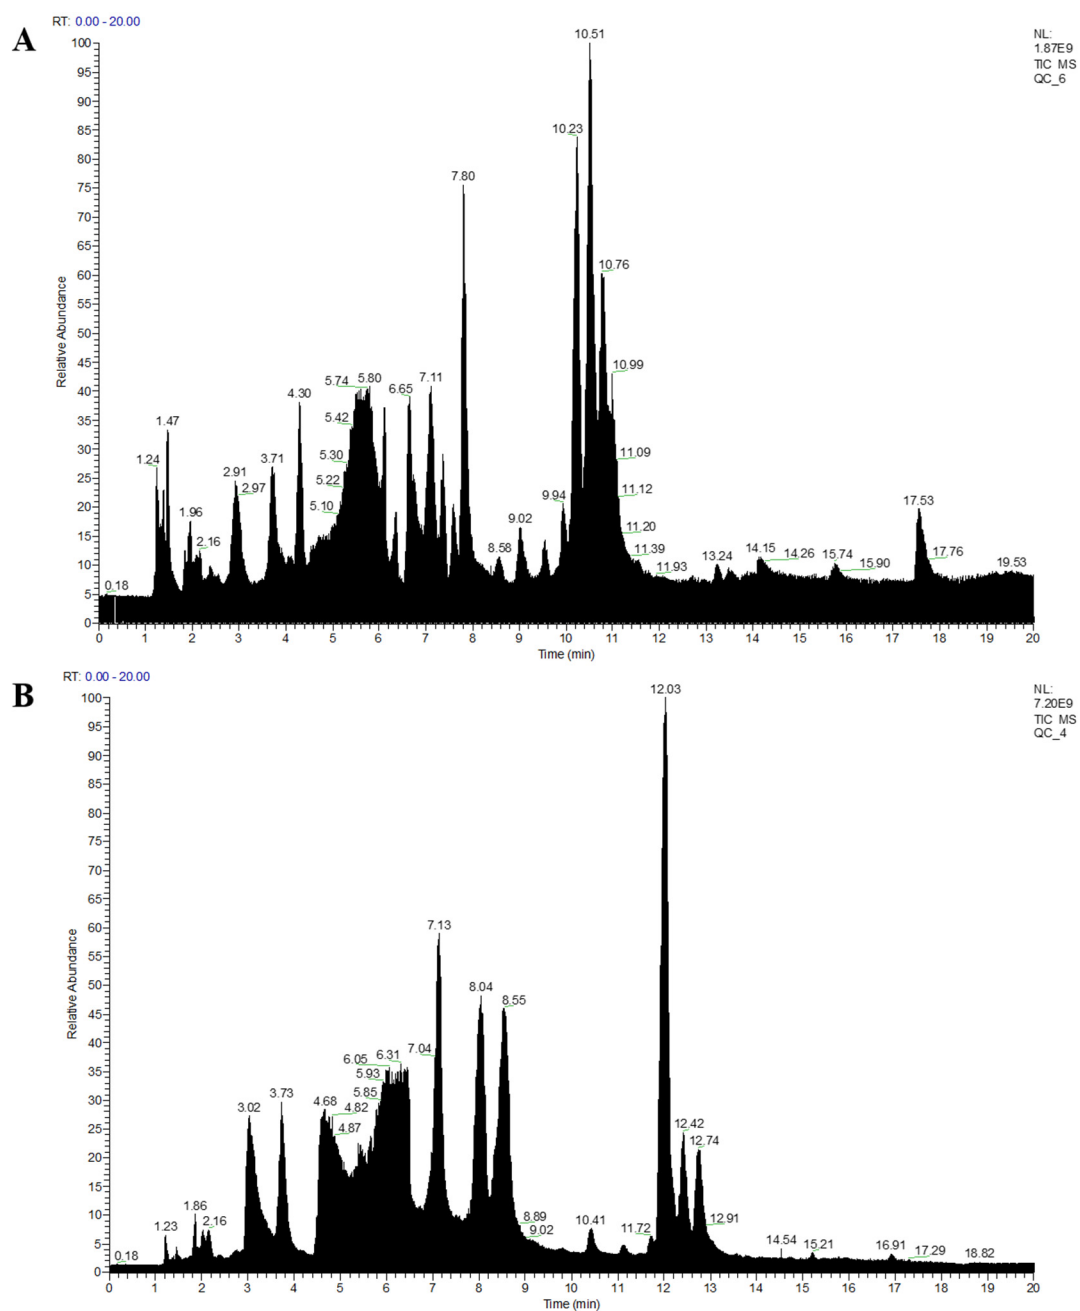

**Figure S1. (A).** The representative total ion chromatogram (TIC) of strawberry sample in the positive ion mode; **(B)** The representative total ion chromatogram (TIC) of strawberry sample in the negative ion mode.

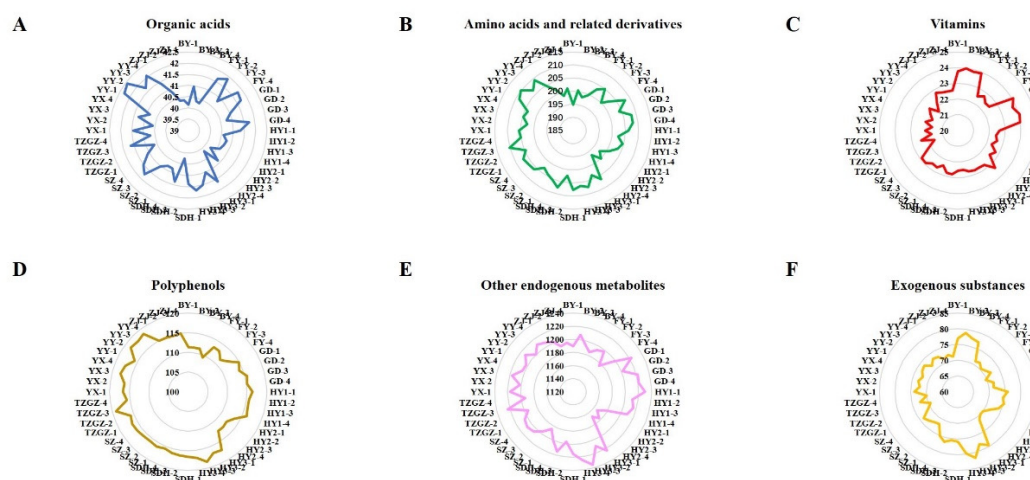

**Figure S2.** The radar maps of the identified compounds in the positive ion mode. **(A)** The total content of organic acids; **(B)** The total content of amino acids and related derivatives; **(C)** The total content of vitamins; **(D)** The total content of nucleosides; **(E)** The total content of other endogenous metabolites; **(F)** The total content of exogenous substances.

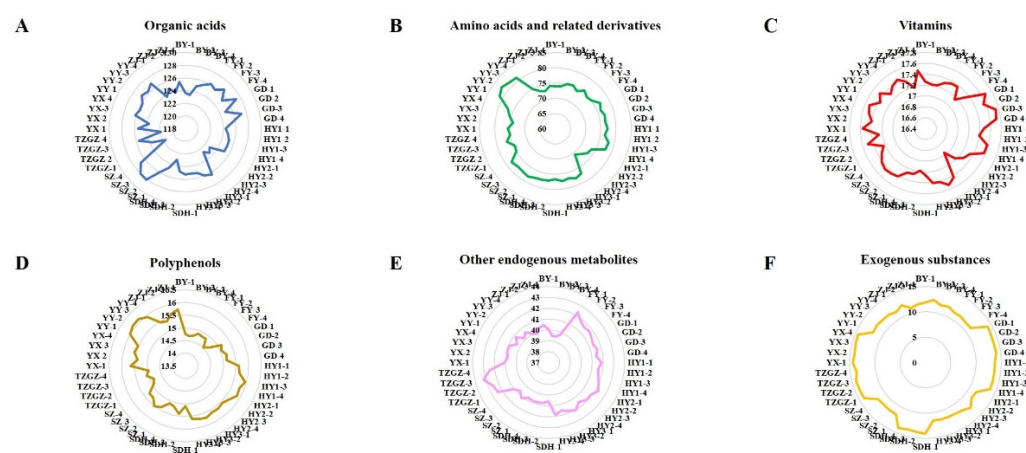

**Figure S3.** The radar maps of the identified compounds in the negative ion mode. **(A)** The total content of organic acids; **(B)** The total content of amino acids and related derivatives; **(C)** The total content of vitamins; **(D)** The total content of nucleosides; **(E)** The total content of other endogenous metabolites; **(F)** The total content of exogenous substances.

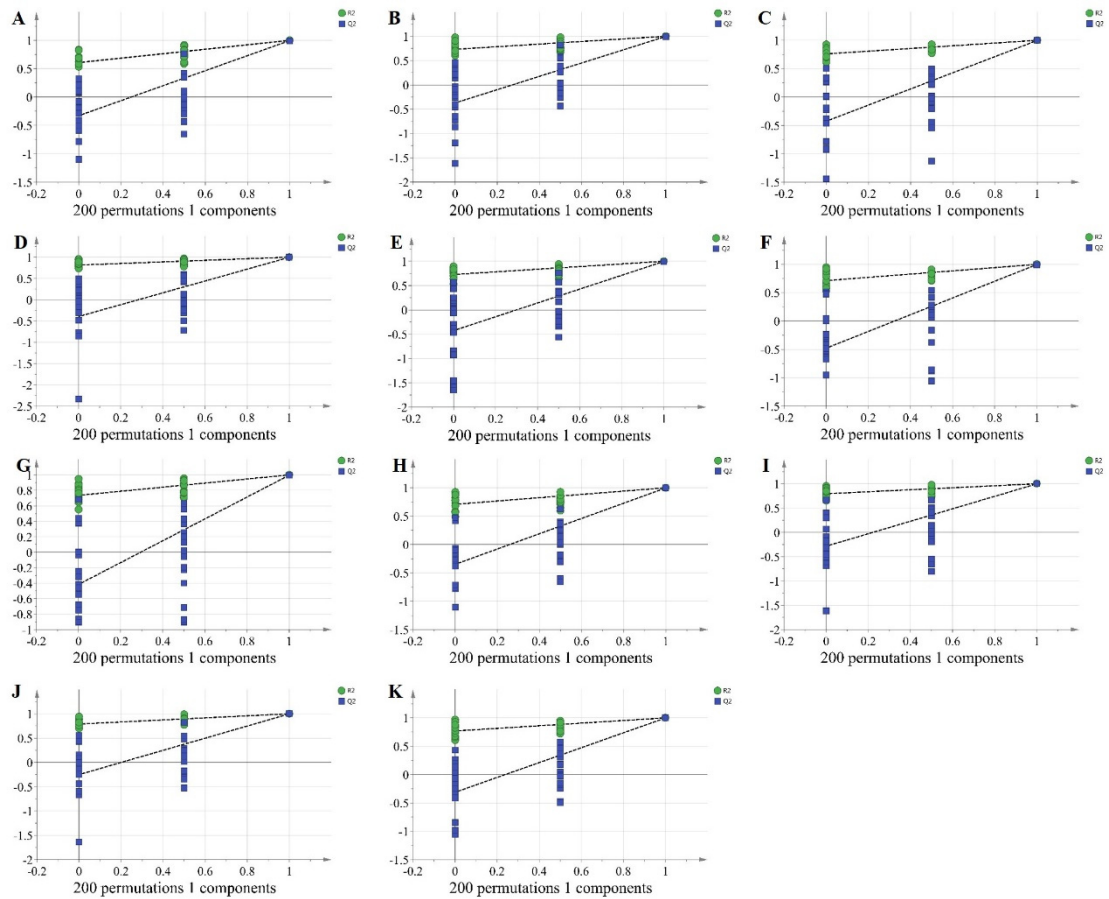

**Figure S4.** The evaluations of the metabolomics OPLS-DA models in the comparison between the BY group and other strawberry groups (permutation test, n=200). **(A)** BY vs FY,  $R^2 = (0.0, 0.616)$ ,  $Q^2 = (0.0, -0.338)$ ; **(B)** BY vs GD,  $R^2 = (0.0, 0.749)$ ,  $Q^2 = (0.0, -0.285)$ ; **(C)** BY vs HY1,  $R^2 = (0.0, 0.757)$ ,  $Q^2 = (0.0, -0.352)$ ; **(D)** BY vs HY2,  $R^2 = (0.0, 0.824)$ ,  $Q^2 = (0.0, -0.296)$ ; **(E)** BY vs HY3,  $R^2 = (0.0, 0.73)$ ,  $Q^2 = (0.0, -0.492)$ ; **(F)** BY vs SDH,  $R^2 = (0.0, 0.703)$ ,  $Q^2 = (0.0, -0.406)$ ; **(G)** BY vs SZ,  $R^2 = (0.0, 0.746)$ ,  $Q^2 = (0.0, -0.385)$ ; **(H)** BY vs TZGZ,  $R^2 = (0.0, 0.691)$ ,  $Q^2 = (0.0, -0.362)$ ; **(I)** BY vs YX,  $R^2 = (0.0, 0.781)$ ,  $Q^2 = (0.0, -0.372)$ ; **(J)** BY vs YY,  $R^2 = (0.0, 0.787)$ ,  $Q^2 = (0.0, -0.28)$ ; **(K)** BY vs ZJ,  $R^2 = (0.0, 0.772)$ ,  $Q^2 = (0.0, -0.261)$ .

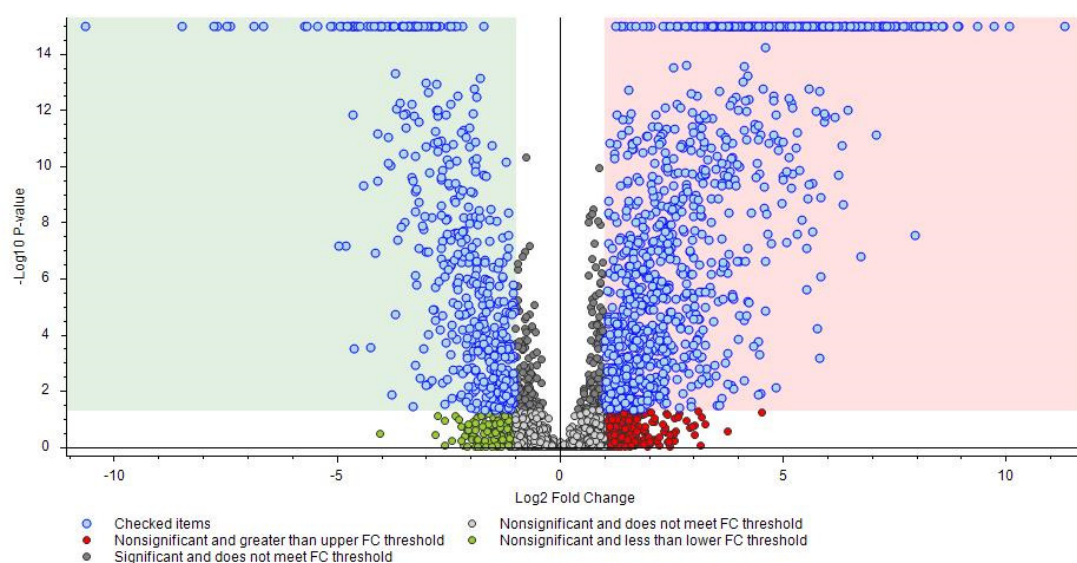

**Figure S5.** The volcano plot of the pairwise comparison between the YY group with the BY group in the positive ion mode.

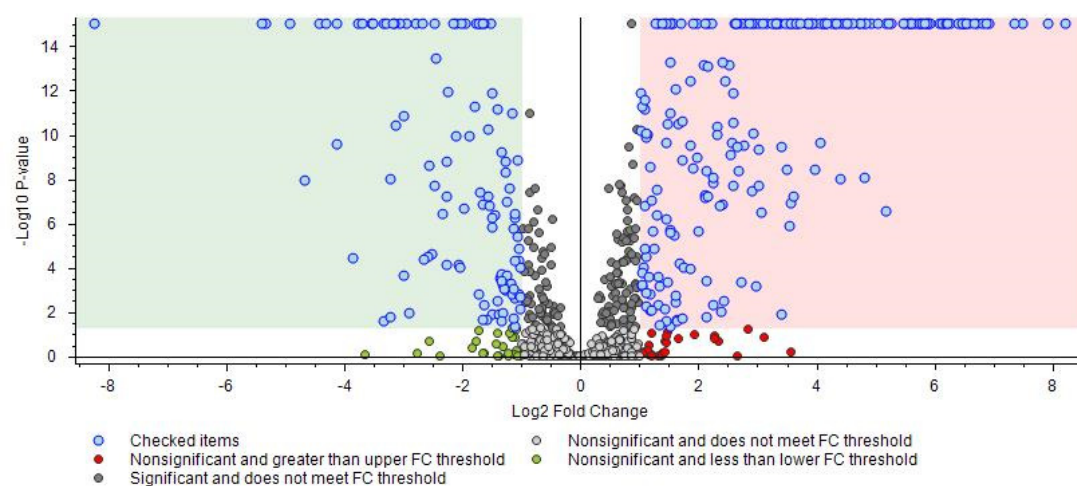

**Figure S6.** The volcano plot of the pairwise comparison between the YY group with the BY group in the negative ion mode.
