# Supplementary material for: Comparative Metabolomic Analysis of the Nutritional Aspects from Ten Cultivars of the Strawberry Fruit
Source: Foods. 2023 Mar 9;12(6):1153. doi: 10.3390/foods12061153 (PMC10048718; doi:10.3390/foods12061153)
Supplement: Supplementary file 1 [file foods-12-01153-s001.zip]

Archive with 4 entries (4 files):
- Supplementary Materials 1-Figures.pdf
- Supplementary Materials 2-Table S1-revised.xlsx
- Supplementary Materials 3-Table S2-revised.xlsx
- Supplementary Materials 4-Table S3-revised.xlsx
