# Supplementary material for: Comparative Metabolomic Analysis of the Nutritional Aspects from Ten Cultivars of the Strawberry Fruit
Source: Foods. 2023 Mar 9;12(6):1153. doi: 10.3390/foods12061153 (PMC10048718; doi:10.3390/foods12061153)
Supplement: Supplementary file 1 [file foods-12-01153-s001.zip › Supplementary Materials 2-Table S1-revised.xlsx]

## Sheet: Sheet1
Number	Compound Name	Formula	m/z	Retention Time (min)	Score in mzCloud	Class	MS2	Representative Fragments	Mode	Reference Ion	Area: BY_1	Area: BY_2	Area: BY_3	Area: BY_4	Area: FY_1	Area: FY_2	Area: FY_3	Area: FY_4	Area: GD_1	Area: GD_2	Area: GD_3	Area: GD_4	Area: HY1_1	Area: HY1_2	Area: HY1_3	Area: HY1_4	Area: HY2_1	Area: HY2_2	Area: HY2_3	Area: HY2_4	Area: HY3_1	Area: HY3_2	Area: HY3_3	Area: HY3_4	Area: SDH_1	Area: SDH_2	Area: SDH_3	Area: SDH_4	Area: SZ_1	Area: SZ_2	Area: SZ_3	Area: SZ_4	Area: TZGZ_1	Area: TZGZ_2	Area: TZGZ_3	Area: TZGZ_4	Area: YX_1	Area: YX_2	Area: YX_3
1	2'-Deoxyadenosine	C10 H13 N5 O3	252.109	3.338	95	Other endogenous metabolites	DDA for preferred ion	136.06	Positive	[M+H]+1	766175	1.16543e+06	617546	595890	5.63419e+06	5.58209e+06	4.95906e+06	6.24091e+06	4.08076e+06	3.31671e+06	4.09415e+06	4.3022e+06	4.47105e+06	2.77406e+06	3.21845e+06	3.33521e+06	4.69543e+06	4.00424e+06	5.43039e+06	4.58913e+06	1.00384e+07	6.8329e+06	1.16719e+07	9.25121e+06	1.97166e+06	1.67763e+06	2.80822e+06	1.36756e+06	701234	726901	1.14223e+06	1.44271e+06	3.57985e+06	2.86e+06	5.59861e+06	3.15159e+06	1.6425e+06	1.53743e+06	2.8834e+06
2	2-Hydroxycinnamic acid	C9 H8 O3	165.055	2.765	93.2	Polyphenols	DDA for preferred ion	147.04	Positive	[M+H]+1	1.14388e+06	81358.5	1.3368e+06	1.10427e+06	65523.1	71406.1	80432.4	85649.9	2.3586e+06	3.43129e+06	2.46034e+06	2.40851e+06	1.0433e+07	1.17173e+07	1.61107e+07	1.39103e+07	1.45512e+07	1.11574e+07	7.52671e+06	1.03104e+07	1.9369e+07	2.50082e+07	1.77708e+07	1.74485e+07	2.02723e+06	5.14337e+06	1.3927e+06	4.02111e+06	6.48959e+06	5.86946e+06	3.29482e+06	3.4781e+06	1.90677e+06	3.20936e+06	2.88176e+06	3.19757e+06	9.39639e+06	1.13063e+07	9.03195e+06
3	2-Hydroxyphenylalanine	C9 H11 N O3	182.081	3.769	93	Amino acids and related derivatives	DDA for preferred ion	136.07	Positive	[M+H]+1	1.03535e+07	1.51971e+07	1.12293e+07	9.96005e+06	1.50485e+07	1.5884e+07	1.18224e+07	1.50822e+07	1.43662e+07	1.03349e+07	1.43302e+07	1.36811e+07	1.36538e+07	1.07496e+07	1.16136e+07	9.53922e+06	8.98369e+06	6.72777e+06	1.00937e+07	6.51983e+06	1.2998e+07	9.26677e+06	1.64323e+07	1.30755e+07	1.52889e+07	1.38253e+07	1.69382e+07	1.15976e+07	1.05011e+07	9.70303e+06	1.4806e+07	1.57569e+07	1.61515e+07	1.27485e+07	2.15332e+07	1.21647e+07	1.82442e+07	1.08666e+07	1.52687e+07
4	2-Hydroxyquinoline	C9 H7 N O	146.06	5.754	88.4	Other endogenous metabolites	DDA for preferred ion	128.08	Positive	[M+H]+1	8.18286e+07	9.1268e+07	9.04139e+07	8.78062e+07	1.34091e+08	1.53266e+08	1.07182e+08	1.44022e+08	8.54996e+07	7.64414e+07	8.92307e+07	8.42509e+07	3.30849e+07	3.20745e+07	3.53381e+07	3.23887e+07	4.26919e+07	3.25118e+07	2.85825e+07	2.70323e+07	5.52871e+07	5.24203e+07	5.92104e+07	5.34808e+07	4.02108e+07	3.22753e+07	3.4253e+07	4.40583e+07	8.20758e+07	8.43595e+07	7.60916e+07	7.90527e+07	8.25726e+07	9.06776e+07	1.35956e+08	9.55786e+07	9.97661e+07	9.65048e+07	9.06697e+07
5	2-Picoline	C6 H7 N	94.0656	7.128	98.8	Other endogenous metabolites	DDA for preferred ion	67.05	Positive	[M+H]+1	1.21996e+07	1.95889e+07	1.32137e+07	1.29656e+07	1.97097e+07	2.06568e+07	1.2113e+07	1.85829e+07	1.70344e+07	1.1067e+07	1.53313e+07	1.65164e+07	1.53746e+07	9.51357e+06	1.12326e+07	1.01364e+07	1.09018e+07	8.5667e+06	1.35166e+07	9.37938e+06	3.46119e+07	2.24753e+07	3.68983e+07	3.51688e+07	1.21626e+07	1.0972e+07	1.37648e+07	1.05017e+07	1.07391e+07	1.02296e+07	1.57795e+07	1.42741e+07	1.4312e+07	1.03976e+07	1.99015e+07	1.07731e+07	1.93511e+07	1.27491e+07	1.94425e+07
6	4-Aminobenzoic acid	C7 H7 N O2	138.055	7.128	99.9	Organic acids	DDA for preferred ion	92.05	Positive	[M+H]+1	4.03737e+09	6.57091e+09	4.2081e+09	4.14539e+09	6.22024e+09	6.76932e+09	3.92427e+09	6.25765e+09	5.33388e+09	3.34276e+09	5.32829e+09	5.38522e+09	4.98029e+09	3.14742e+09	3.60556e+09	3.12999e+09	3.64613e+09	2.84917e+09	4.4177e+09	2.9606e+09	1.13598e+10	7.31769e+09	1.24324e+10	1.15709e+10	4.28793e+09	2.96127e+09	4.60297e+09	3.18966e+09	3.34876e+09	3.02515e+09	4.94998e+09	4.97642e+09	4.63826e+09	3.32104e+09	6.57653e+09	3.38012e+09	6.46209e+09	4.14905e+09	6.08192e+09
7	4-Guanidinobutyric acid	C5 H11 N3 O2	146.092	5.719	89.5	Organic acids	DDA for preferred ion	121.97	Positive	[M+H]+1	6.94721e+07	1.06069e+08	7.69722e+07	7.18454e+07	1.45858e+08	1.4785e+08	1.21093e+08	1.48317e+08	1.75863e+08	1.15044e+08	1.82819e+08	1.82099e+08	1.31181e+08	8.45749e+07	9.62093e+07	8.59014e+07	8.80951e+07	7.12715e+07	1.10278e+08	7.25211e+07	1.80748e+08	1.08867e+08	1.84247e+08	1.71943e+08	1.12326e+08	7.08393e+07	1.29774e+08	8.90559e+07	8.11996e+07	8.45875e+07	1.34423e+08	1.3456e+08	1.11712e+08	8.38316e+07	1.4425e+08	8.6699e+07	1.71044e+08	1.20491e+08	1.62984e+08
8	4-Hydroxybenzaldehyde	C7 H6 O2	123.044	7.829	85.4	Polyphenols	DDA for preferred ion	95.05	Positive	[M+H]+1	3.83341e+07	5.03922e+07	5.04671e+07	5.21985e+07	5.52234e+07	4.78974e+07	6.56952e+07	4.47291e+07	1.50219e+08	1.34513e+08	1.70782e+08	1.49184e+08	1.09792e+08	9.01098e+07	9.16814e+07	7.44514e+07	6.66531e+07	5.3388e+07	6.96682e+07	6.86429e+07	7.16849e+07	5.02896e+07	1.11049e+08	8.0935e+07	2.3038e+08	2.39474e+08	2.58759e+08	2.43911e+08	1.2642e+08	1.49863e+08	1.54617e+08	1.80613e+08	1.14993e+08	1.00972e+08	1.37775e+08	1.12525e+08	1.39272e+08	1.45033e+08	1.23905e+08
9	4-Methoxybenzaldehyde	C8 H8 O2	137.06	1.831	90	Polyphenols	DDA for preferred ion	122.04	Positive	[M+H]+1	3.46048e+06	5.4718e+06	3.54295e+06	3.18772e+06	1.14373e+07	9.94043e+06	1.0171e+07	9.51132e+06	6.36636e+06	6.51083e+06	6.5554e+06	6.10581e+06	5.90886e+06	5.67476e+06	4.27434e+06	7.12272e+06	6.78302e+06	6.94407e+06	6.15432e+06	7.40913e+06	1.08742e+07	8.15892e+06	1.03813e+07	8.38404e+06	5.61874e+06	6.8843e+06	5.68751e+06	3.91058e+06	3.59289e+06	3.9492e+06	4.50687e+06	3.87161e+06	1.43816e+07	9.63123e+06	1.51906e+07	7.78663e+06	4.51117e+06	4.99533e+06	9.69846e+06
10	5-Aminolevulinic acid	C5 H9 N O3	132.066	9.196	93.8	Other endogenous metabolites	DDA for preferred ion	84.08	Positive	[M+H]+1	3.87569e+07	4.97042e+07	4.25921e+07	4.82944e+07	4.09425e+07	4.0832e+07	3.29456e+07	3.97968e+07	8.58376e+07	7.29566e+07	1.05765e+08	8.46104e+07	7.95991e+07	5.65217e+07	6.5561e+07	5.38506e+07	7.67861e+07	5.37421e+07	7.27123e+07	5.62586e+07	1.10552e+08	8.55633e+07	1.72306e+08	1.47952e+08	4.19953e+07	9.3592e+06	4.87869e+07	4.20311e+07	7.70648e+07	8.21956e+07	9.79565e+07	1.04882e+08	2.26822e+07	2.14519e+07	3.16667e+07	2.10835e+07	3.16588e+07	2.60311e+07	2.8144e+07
11	5-hydroxy-4-methoxy-5,6-dihydro-2H-pyran-2-one	C6 H8 O4	145.049	10.26	60.6	Other endogenous metabolites	DDA for preferred ion	99.04	Positive	[M+H]+1	6.07587e+08	4.67404e+08	6.42065e+08	4.08671e+08	3.74752e+08	3.38765e+08	5.76247e+08	3.337e+08	5.30992e+08	6.58084e+08	5.50129e+08	5.06909e+08	6.18456e+08	7.5582e+08	7.79365e+08	7.56839e+08	5.84772e+08	5.1646e+08	3.52982e+08	5.52947e+08	4.65579e+08	6.33071e+08	6.08041e+08	5.37023e+08	6.3057e+08	9.76838e+08	5.27102e+08	8.98211e+08	5.45196e+08	5.60096e+08	3.46e+08	4.52554e+08	4.79568e+08	6.47734e+08	5.89437e+08	6.55529e+08	4.84824e+08	6.63913e+08	3.81068e+08
12	5'-S-Methyl-5'-thioadenosine	C11 H15 N5 O3 S	298.096	2.355	81.2	Other endogenous metabolites	DDA for preferred ion	136.06	Positive	[M+H]+1	1.12554e+07	9.95859e+06	8.1163e+06	8.64437e+06	1.37936e+07	1.80175e+07	1.34876e+07	1.64777e+07	2.80352e+07	2.18595e+07	3.32256e+07	3.38352e+07	3.10349e+07	2.72788e+07	3.37674e+07	2.97412e+07	2.59035e+07	2.53491e+07	2.38688e+07	2.45225e+07	5.2728e+07	4.18291e+07	5.80454e+07	5.6426e+07	2.16442e+07	2.09478e+07	2.32218e+07	2.06367e+07	2.67336e+07	2.5838e+07	3.38446e+07	3.75253e+07	2.23001e+07	1.78887e+07	2.59219e+07	1.70566e+07	3.09959e+07	2.63811e+07	2.69632e+07
13	7-Methylguanine	C6 H7 N5 O	166.072	4.539	71.3	Other endogenous metabolites	DDA for preferred ion	124.09	Positive	[M+H]+1	2.02282e+06	2.41668e+06	1.6817e+06	1.80729e+06	3.28641e+06	3.33007e+06	2.43283e+06	3.10455e+06	1.61691e+06	988574	1.52206e+06	1.93553e+06	1.44307e+06	727934	1.30823e+06	1.18949e+06	1.5286e+06	1.73052e+06	1.91666e+06	1.40364e+06	1.99127e+06	1.46459e+06	1.72226e+06	1.54652e+06	1.25417e+06	60727.2	1.21132e+06	1.0717e+06	2.31906e+06	1.66197e+06	2.25284e+06	2.60608e+06	1.42083e+06	766990	3.39661e+06	907046	1.10845e+06	809283	1.06511e+06
14	Adenine	C5 H5 N5	136.062	3.694	99.9	Other endogenous metabolites	DDA for preferred ion	109.05	Positive	[M+H]+1	4.81042e+08	7.22511e+08	5.78083e+08	4.84816e+08	1.66486e+09	1.62571e+09	1.10286e+09	1.83155e+09	4.98921e+08	3.44103e+08	4.75426e+08	4.25543e+08	3.29263e+08	1.98876e+08	2.31689e+08	1.85723e+08	1.36481e+09	1.10128e+09	1.63685e+09	9.73936e+08	6.96453e+08	5.08448e+08	8.97425e+08	7.95034e+08	2.76934e+08	1.60204e+08	3.40718e+08	2.13199e+08	8.9276e+07	1.03642e+08	1.52411e+08	1.64703e+08	5.16587e+08	3.94443e+08	7.62281e+08	3.9461e+08	3.8098e+08	2.17294e+08	3.80228e+08
15	Adenosine	C10 H13 N5 O4	268.104	3.961	99.2	Other endogenous metabolites	DDA for preferred ion	115.04	Positive	[M+H]+1	3.82788e+08	5.26913e+08	4.74886e+08	3.91673e+08	6.36576e+08	6.44265e+08	5.06814e+08	7.25373e+08	7.48721e+08	5.15462e+08	7.64193e+08	7.48225e+08	6.91124e+08	4.42532e+08	5.37921e+08	4.57469e+08	8.07757e+08	6.59145e+08	7.94684e+08	6.53944e+08	1.06127e+09	7.91006e+08	1.20052e+09	1.20068e+09	3.38236e+08	2.6186e+08	3.9848e+08	2.8254e+08	2.77763e+08	2.7619e+08	4.00107e+08	4.27418e+08	4.50581e+08	3.60165e+08	7.60134e+08	3.73173e+08	3.01553e+08	2.65565e+08	3.41436e+08
16	Asparagine	C4 H8 N2 O3	133.061	10.812	99.2	Amino acids and related derivatives	DDA for preferred ion	74.02	Positive	[M+H]+1	1.99622e+09	2.29515e+09	1.95053e+09	2.3817e+09	5.64163e+09	5.94896e+09	4.88638e+09	5.66249e+09	5.94024e+09	4.70849e+09	6.14305e+09	6.0428e+09	4.57207e+09	3.66569e+09	4.11601e+09	3.67905e+09	4.93233e+09	4.21537e+09	4.86511e+09	4.03428e+09	4.84153e+09	3.82155e+09	4.93047e+09	4.38485e+09	5.09748e+09	4.38419e+09	4.88721e+09	4.49048e+09	4.46997e+09	4.4435e+09	5.18836e+09	5.50981e+09	5.25718e+09	4.58143e+09	6.71465e+09	4.7132e+09	4.72741e+09	3.83866e+09	4.45443e+09
17	Aspartame	C14 H18 N2 O5	295.129	8.303	65.8	Exogenous substances	DDA for preferred ion	120.08	Positive	[M+H]+1	465172	896410	726956	684428	1.02208e+06	1.11545e+06	1.09741e+06	923559	6.63765e+06	5.1737e+06	7.10064e+06	5.57545e+06	2.53361e+06	1.8441e+06	1.88181e+06	1.47618e+06	784727	508791	399744	838052	2.47598e+06	1.82832e+06	3.77389e+06	2.85509e+06	1.30127e+07	1.43444e+07	1.46578e+07	1.58022e+07	2.48972e+06	3.39988e+06	3.47144e+06	3.96657e+06	3.11742e+06	3.26642e+06	3.93252e+06	3.45047e+06	3.90551e+06	3.28413e+06	3.58139e+06
18	Avicularin	C20 H18 O11	435.092	2.363	95	Polyphenols	DDA for preferred ion	303.05	Positive	[M+H]+1	2.3745e+06	2.21907e+06	2.25796e+06	2.42066e+06	75694.6	79323.7	63431.7	65858.8	73211.6	53999.1	71648.2	70945	77571.2	50616.9	58905.2	48352	56945.3	47863	47935.4	58841.6	84586.6	67944.4	99088.5	91901.1	71468.2	67010.5	74925	56683.3	79781.6	71625.8	101161	108630	72705.5	50617.4	72548.9	52117.7	73780.1	57641.9	74380.6
19	Betaine	C5 H11 N O2	118.086	6.655	98.8	Other endogenous metabolites	DDA for preferred ion	59.07	Positive	[M+H]+1	5.37793e+08	8.96789e+08	6.54578e+08	5.7766e+08	2.74625e+09	2.74195e+09	2.21046e+09	2.88541e+09	2.13299e+09	1.46049e+09	1.96367e+09	1.92348e+09	1.06203e+09	7.17913e+08	7.17125e+08	6.17676e+08	2.96378e+09	2.65186e+09	3.528e+09	1.85406e+09	1.02006e+09	6.29228e+08	1.18034e+09	1.04746e+09	1.0345e+09	6.41392e+08	1.13948e+09	7.69593e+08	7.25745e+08	8.52451e+08	1.20198e+09	1.15706e+09	1.7481e+09	1.38149e+09	2.0551e+09	1.51097e+09	2.25686e+09	1.67395e+09	2.2262e+09
20	Bupirimate	C13 H24 N4 O3 S	317.164	1.258	94.5	Other endogenous metabolites	DDA for preferred ion	166.1	Positive	[M+H]+1	1.24617e+08	1.912e+08	1.30355e+08	1.30942e+08	76944.9	86517.6	66190.2	77585.9	2.39619e+06	787487	1.5259e+06	1.32678e+06	1.46981e+08	1.15075e+08	1.19996e+08	1.1817e+08	111555	61115.6	62406.1	76503.8	8.242e+06	5.1525e+06	1.06789e+07	8.74812e+06	9.94205e+07	8.32039e+07	1.20045e+08	8.7636e+07	98443.6	72065.9	176165	106699	329504	207598	419942	282139	2.18258e+06	1.52087e+06	2.00563e+06
21	Cetrimonium	C19 H41 N	284.331	1.878	88.8	Other endogenous metabolites	DDA for preferred ion	89.06	Positive	[M+H]+1	290982	418711	269173	132145	315684	396022	343198	289606	539729	276231	568524	276967	1.28662e+06	814749	814540	725865	682687	598971	534530	771572	246706	158613	248712	202316	1.8614e+06	337329	576211	264423	173583	204895	261881	336305	317207	228031	600377	219609	403765	306957	352902
22	Chlormequat	C5 H12 Cl N	122.073	2.937	74.9	Exogenous substances	DDA for preferred ion	78.03	Positive	[M+H]+1	7.31583e+06	9.48618e+06	7.6119e+06	7.54578e+06	131984	158570	114570	144401	1.23543e+06	751855	1.30673e+06	1.18444e+06	316192	210973	263584	205128	110903	92554.4	124957	105769	988124	660924	1.25988e+06	708729	2.50083e+06	2.11614e+06	2.63609e+06	2.1372e+06	6.25907e+06	6.34876e+06	9.78202e+06	9.72431e+06	921933	594564	1.40033e+06	636062	2.70335e+06	2.17555e+06	2.72603e+06
23	Chlorogenic acid	C16 H18 O9	337.089	3.8	78.1	Polyphenols	DDA for preferred ion	135.12	Positive	[M+H]+1	1.44401e+06	2.18231e+06	2.74836e+06	1.61829e+06	5.10491e+06	5.20175e+06	2.73163e+06	4.83002e+06	2.52429e+06	1.77991e+06	2.39943e+06	2.2404e+06	1.54083e+06	1.16541e+06	910202	1.38639e+06	672736	706892	738245	521591	1.08229e+06	1.89698e+06	1.48863e+06	972781	4.17837e+06	3.01045e+06	3.94313e+06	2.415e+06	3.60443e+06	1.58421e+06	1.93879e+06	1.8446e+06	5.70108e+06	3.67883e+06	7.22746e+06	3.55481e+06	2.43761e+06	1.687e+06	3.13208e+06
24	Choline	C5 H13 N O	104.107	4.316	97.8	Vitamins	DDA for preferred ion	60.08	Positive	[M+H]+1	2.69912e+09	4.19102e+09	2.68173e+09	2.4035e+09	9.7868e+09	9.88875e+09	6.5149e+09	9.11938e+09	5.81834e+09	3.42815e+09	6.41666e+09	5.57199e+09	3.47088e+09	1.70965e+09	2.12927e+09	2.01679e+09	3.34487e+09	2.76299e+09	6.73214e+09	3.17955e+09	4.47921e+09	2.66653e+09	5.36275e+09	4.52832e+09	4.77425e+09	3.73074e+09	5.78365e+09	2.95512e+09	4.92332e+09	4.63341e+09	8.71245e+09	9.16596e+09	5.27581e+09	3.07611e+09	6.99481e+09	3.49326e+09	4.02467e+09	2.49044e+09	4.47834e+09
25	Cyanidin	C15 H10 O6	287.055	2.828	75.9	Polyphenols	DDA for preferred ion	106.08	Positive	[M+H]+1	5.33865e+06	4.45708e+06	3.92954e+06	2.82666e+06	1.2576e+07	1.16635e+07	1.13037e+07	1.05352e+07	6.42839e+06	6.80243e+06	7.75896e+06	7.93324e+06	1.00229e+07	7.90502e+06	7.35595e+06	1.14951e+07	6.80302e+06	6.39287e+06	5.30005e+06	7.05117e+06	1.15888e+07	1.24163e+07	1.34183e+07	8.42365e+06	2.76012e+06	3.25984e+06	2.76244e+06	2.16466e+06	7.17061e+06	7.06152e+06	6.60014e+06	5.91256e+06	5.58368e+06	5.46682e+06	1.09455e+07	5.70666e+06	3.91952e+06	4.44832e+06	5.99016e+06
26	Cytidine	C9 H13 N3 O5	244.093	6.137	99.2	Other endogenous metabolites	DDA for preferred ion	112.05	Positive	[M+H]+1	2.45109e+08	3.16945e+08	1.03303e+08	2.32142e+08	2.5007e+08	3.43179e+08	67559.9	3.847e+08	1.1203e+08	3.51082e+07	8.85062e+07	1.31158e+08	1.17986e+08	4.84416e+07	8.92647e+07	1.03031e+08	2.34776e+08	2.81663e+08	2.22026e+08	439029	2.58975e+08	2.40498e+08	1.00882e+08	2.4871e+08	5.56309e+07	67915.1	1.87308e+07	3.35218e+06	4.38126e+07	1.31687e+07	4.50675e+07	4.97703e+07	7.95061e+07	2.53605e+07	1.15557e+08	2.33244e+07	7.36026e+07	1.12156e+07	8.57647e+07
27	Aspartic acid	C4 H7 N O4	134.045	10.731	91.1	Amino acids and related derivatives	DDA for preferred ion	74.02	Positive	[M+H]+1	1.61466e+08	1.64803e+08	1.50588e+08	1.76465e+08	1.13805e+08	1.81957e+08	6.7272e+07	1.78049e+08	2.51081e+08	1.80177e+08	2.31159e+08	2.64402e+08	2.33505e+08	1.87836e+08	2.45686e+08	2.24468e+08	1.63961e+08	1.41159e+08	1.18302e+08	1.03159e+08	1.97238e+08	1.70558e+08	1.61053e+08	5.32816e+07	2.34727e+08	9.27413e+07	1.582e+08	1.80931e+08	3.07925e+08	2.41285e+08	2.8043e+08	3.09081e+08	1.30419e+08	1.03785e+08	1.80608e+08	1.08263e+08	1.54671e+08	1.05607e+08	1.44776e+08
28	D-(+)-Maltose	C12 H22 O11	365.105	8.254	89.9	Other endogenous metabolites	DDA for preferred ion	203.05	Positive	[M+H]+1	8.43273e+07	1.021e+08	8.862e+07	1.22001e+08	6.22632e+07	6.78029e+07	5.22795e+07	6.31594e+07	6.00556e+07	4.74561e+07	6.04639e+07	5.58992e+07	6.87666e+07	5.1739e+07	5.75677e+07	5.43333e+07	5.4425e+07	4.72546e+07	6.15397e+07	4.945e+07	5.16431e+07	4.69023e+07	6.87233e+07	5.76951e+07	3.78691e+07	2.94365e+07	3.96061e+07	3.31895e+07	7.31747e+07	8.26896e+07	9.35044e+07	1.02396e+08	5.84735e+07	5.47202e+07	7.65707e+07	5.38373e+07	9.04705e+07	7.4928e+07	8.53521e+07
29	D-(+)-Proline	C5 H9 N O2	116.071	7.597	99.3	Amino acids and related derivatives	DDA for preferred ion	70.06	Positive	[M+H]+1	3.80587e+08	6.87406e+08	5.01841e+08	4.87876e+08	6.45317e+08	6.16832e+08	6.28948e+08	5.42696e+08	1.29992e+09	9.19143e+08	1.27788e+09	1.1249e+09	1.56783e+09	1.00002e+09	1.08107e+09	9.82223e+08	6.69906e+08	6.13357e+08	9.74703e+08	5.72172e+08	1.94435e+09	1.15206e+09	2.12787e+09	2.18613e+09	9.93141e+08	6.51897e+08	1.02393e+09	6.69538e+08	8.87941e+08	1.12298e+09	1.51508e+09	1.44043e+09	1.46811e+09	1.06839e+09	1.5167e+09	9.52919e+08	3.42225e+09	2.47523e+09	2.9108e+09
30	D-(+)-Pyroglutamic Acid	C5 H7 N O3	130.05	4.327	99.7	Organic acids	DDA for preferred ion	84.04	Positive	[M+H]+1	2.14126e+08	2.53288e+08	2.37706e+08	2.79513e+08	2.70845e+08	2.81261e+08	2.60385e+08	2.71795e+08	3.06869e+08	2.60825e+08	3.30135e+08	2.88092e+08	3.46083e+08	2.76052e+08	3.04559e+08	2.61139e+08	1.97357e+08	1.56278e+08	1.98332e+08	1.89395e+08	2.23061e+08	1.81676e+08	2.82533e+08	2.25984e+08	3.42799e+08	2.88065e+08	3.26501e+08	3.01742e+08	4.09532e+08	4.23127e+08	4.81308e+08	4.90724e+08	2.31935e+08	2.23533e+08	2.7566e+08	2.28828e+08	2.62154e+08	2.30562e+08	2.25622e+08
31	Allopurinol	C5 H4 N4 O	137.046	5.018	98.6	Other endogenous metabolites	DDA for preferred ion	91.05	Positive	[M+H]+1	8.64367e+06	1.2516e+07	7.36116e+06	9.28363e+06	1.40824e+07	2.12763e+07	4.94642e+06	1.95021e+07	4.03885e+07	2.26363e+07	4.02495e+07	4.28848e+07	1.91921e+07	1.47673e+07	1.7514e+07	1.60879e+07	9.33388e+06	6.56177e+06	8.36389e+06	2.61668e+06	2.64816e+07	1.98387e+07	2.98259e+07	2.68583e+07	9.66077e+06	3.8852e+06	3.50768e+06	4.09107e+06	4.5232e+06	3.80861e+06	5.76478e+06	6.97929e+06	2.46534e+07	1.71116e+07	3.89529e+07	2.10008e+07	6.48913e+06	2.59152e+06	6.22244e+06
32	alpha-D-Glucopyranosyl 2-O-(2-methylbutanoyl)-alpha-D-glucopyranoside	C17 H30 O12	449.163	5.772	94.4	Other endogenous metabolites	DDA for preferred ion	347.09	Positive	[M+H]+1	4.31994e+07	6.42526e+07	5.27723e+07	4.79866e+07	1.07261e+07	1.50942e+07	1.01946e+07	1.31457e+07	5.99361e+06	6.64158e+06	1.15273e+06	3.85791e+06	994109	978485	480336	416000	762879	1.38831e+06	1.89222e+06	1.39005e+06	1.15593e+06	3.05093e+06	1.1777e+06	795049	1.3968e+06	1.94404e+06	1.26001e+06	1.19794e+06	4.03732e+06	4.61836e+06	6.69142e+06	6.4771e+06	292612	244854	366450	460650	1.65879e+06	1.36389e+06	1.5488e+06
33	Apigenin	C15 H10 O5	271.059	5.591	100	Polyphenols	DDA for preferred ion	110.06	Positive	[M+H]+1	1.82088e+07	3.36768e+07	2.29613e+07	1.86196e+07	4.2866e+07	4.65161e+07	1.77232e+07	4.17506e+07	1.04343e+09	6.07673e+08	1.03691e+09	1.02339e+09	1.58058e+09	1.09741e+09	1.17257e+09	1.06e+09	1.24636e+09	1.05291e+09	1.55785e+09	9.09053e+08	1.72522e+09	1.20522e+09	2.09181e+09	1.83143e+09	7.85807e+08	3.23525e+08	6.56961e+08	5.76463e+08	7.8568e+08	6.90003e+08	1.11429e+09	1.12239e+09	5.78976e+08	4.16545e+08	8.62639e+08	4.26415e+08	9.76598e+08	1.06273e+09	1.53476e+09
34	Difenoconazole	C19 H17 Cl2 N3 O3	406.072	1.275	79.4	Exogenous substances	DDA for preferred ion	251	Positive	[M+H]+1	59941.8	90972.2	62261.8	61709.1	1.19514e+07	1.06913e+07	9.12638e+06	9.53405e+06	258495	46001.9	186371	89267.9	2.26916e+07	1.75352e+07	2.17508e+07	1.97834e+07	1.8623e+07	1.50226e+07	1.39284e+07	1.77411e+07	4.35439e+07	3.16357e+07	7.6649e+07	4.82897e+07	556018	454413	461797	540478	84542.7	63196.5	68187.7	99566.9	56476.5	43492	88422.8	59443.3	165037	95961.7	99118.9
35	Dimethirimol	C11 H19 N3 O	210.16	1.861	98	Exogenous substances	DDA for preferred ion	149.06	Positive	[M+H]+1	1.46497e+07	2.0536e+07	1.39172e+07	1.19468e+07	54536.7	56199	46915.1	57771.3	90914.6	44834.1	58931.2	57815.5	9.17448e+06	6.32035e+06	5.70199e+06	5.24697e+06	44012	42065.4	39726.8	40983.8	3.40706e+06	2.39738e+06	6.4965e+06	3.95017e+06	6.50962e+06	4.82572e+06	7.65399e+06	4.94098e+06	45359.5	50042.1	62879.3	64252.1	48335.3	39053.5	55981.1	43741.4	190967	104569	143572
36	DL-Arginine	C6 H14 N4 O2	175.119	14.115	98.9	Amino acids and related derivatives	DDA for preferred ion	116.07	Positive	[M+H]+1	8.07906e+07	8.42723e+07	8.61508e+07	8.66015e+07	6.39903e+08	5.37594e+08	6.13001e+08	6.74791e+08	4.47917e+08	3.265e+08	3.71732e+08	3.06777e+08	1.8342e+08	1.20813e+08	1.59076e+08	1.26884e+08	9.73004e+07	6.85423e+07	1.10413e+08	7.88674e+07	1.74512e+08	1.3679e+08	1.71691e+08	1.60499e+08	5.82856e+08	6.29856e+08	5.84846e+08	6.70653e+08	1.3549e+08	1.6011e+08	1.3769e+08	1.95245e+08	4.47978e+08	3.6819e+08	5.01587e+08	4.02781e+08	2.02895e+08	2.37089e+08	2.15335e+08
37	D-Raffinose	C18 H32 O16	522.203	10.253	93.6	Other endogenous metabolites	DDA for preferred ion	145.05	Positive	[M+H]+1	1.47844e+08	1.45382e+08	1.54627e+08	1.3447e+08	1.13462e+08	1.10989e+08	1.37579e+08	1.11729e+08	1.66389e+08	1.72103e+08	1.76697e+08	1.65677e+08	2.05591e+08	1.98213e+08	2.22241e+08	2.01576e+08	1.45649e+08	1.21117e+08	1.1476e+08	1.36232e+08	1.57217e+08	1.63516e+08	1.94555e+08	1.70837e+08	2.11086e+08	2.56022e+08	1.99111e+08	2.46699e+08	1.29415e+08	1.36863e+08	1.1929e+08	1.38085e+08	1.48696e+08	1.72365e+08	1.90185e+08	1.67341e+08	1.53308e+08	1.59932e+08	1.32569e+08
38	D-Serine	C3 H7 N O3	106.05	10.596	99.6	Amino acids and related derivatives	DDA for preferred ion	60.05	Positive	[M+H]+1	1.71283e+08	1.69461e+08	1.64612e+08	1.79271e+08	1.27082e+08	1.58675e+08	1.35806e+08	1.52524e+08	2.09729e+08	1.75316e+08	2.15753e+08	2.13186e+08	2.03316e+08	1.62343e+08	2.15089e+08	1.60943e+08	1.53352e+08	1.23754e+08	1.16231e+08	1.11615e+08	3.02294e+08	2.67764e+08	2.82702e+08	2.8329e+08	2.11875e+08	2.02079e+08	2.06612e+08	2.14343e+08	2.42433e+08	2.31172e+08	2.11195e+08	2.5279e+08	2.1893e+08	2.01465e+08	2.91959e+08	2.11735e+08	1.94342e+08	1.75236e+08	1.86744e+08
39	Ecgonine methyl ester	C10 H17 N O3	200.128	5.595	84.8	Other endogenous metabolites	DDA for preferred ion	154.12	Positive	[M+H]+1	1.73289e+07	2.48297e+07	1.88885e+07	1.73151e+07	2.86074e+06	3.95499e+06	2.78637e+06	3.34564e+06	9.95162e+06	6.12328e+06	1.08852e+07	1.02366e+07	1.25815e+07	8.0443e+06	1.0482e+07	8.49337e+06	846463	1.41798e+06	2.375e+06	1.20175e+06	1.52971e+07	1.13631e+07	1.71677e+07	1.83315e+07	324069	150403	356767	278009	4.82968e+06	4.57354e+06	7.88427e+06	8.9926e+06	2.23544e+06	2.07314e+06	2.10374e+06	2.0525e+06	8.95275e+06	6.84099e+06	7.70583e+06
40	Erucamide	C22 H43 N O	338.341	1.238	85.3	Exogenous substances	DDA for preferred ion	238.22	Positive	[M+H]+1	1.17385e+07	2.54195e+07	1.15252e+07	1.26336e+07	2.30339e+07	2.26921e+07	2.03061e+07	2.06663e+07	2.06028e+07	1.88645e+07	1.83981e+07	2.84353e+07	2.32265e+07	2.11234e+07	2.02891e+07	1.21579e+07	5.10006e+07	2.76118e+07	2.73081e+07	4.07807e+07	1.87034e+07	1.44201e+07	2.45783e+07	2.30298e+07	2.78454e+07	3.11845e+07	3.4989e+07	2.75641e+07	2.32754e+07	1.73998e+07	2.03306e+07	2.25743e+07	1.86526e+07	1.37014e+07	2.26308e+07	1.76169e+07	2.33882e+07	1.61538e+07	2.48833e+07
41	Ethylphthalyl ethylglycolate	C14 H16 O6	281.102	2.659	85.1	Exogenous substances	DDA for preferred ion	149.02	Positive	[M+H]+1	47095.5	65941.9	50781.6	47475.1	60026.9	62290.5	56314.5	65335.5	68749.2	52964.2	69889	68973.4	67175.9	53314	53136.7	47740.5	51264.2	43756.8	44861.5	54435.2	71084.6	53341.4	80548.7	72529.6	69918	58886.6	68993.7	56567	50606.6	55431.1	74398.3	72022.8	55418.6	47016.9	56347.8	45107	75981.3	65906.7	69155.5
42	Etoxazole	C21 H23 F2 N O2	360.176	1.223	93.9	Exogenous substances	DDA for preferred ion	141.01	Positive	[M+H]+1	1.53567e+07	1.87834e+07	2.09213e+07	1.51547e+07	74129.9	85278.5	64647.4	75777.5	1.96891e+07	1.1195e+07	1.80463e+07	1.67955e+07	1.48899e+08	1.07225e+08	1.25338e+08	1.0745e+08	67668.4	47593.1	46361.3	72062.9	6.86935e+06	4.3048e+06	1.2358e+07	4.48887e+06	1.15722e+08	9.69281e+07	1.49937e+08	1.09874e+08	1.68563e+06	1.50152e+06	2.43598e+06	2.81775e+06	7.40782e+07	5.75256e+07	1.17627e+08	5.53787e+07	1.77691e+08	1.29649e+08	1.65614e+08
43	Guanine	C5 H5 N5 O	152.057	5.513	98.8	Other endogenous metabolites	DDA for preferred ion	136.01	Positive	[M+H]+1	3.18477e+07	4.64712e+07	3.80027e+07	3.13466e+07	5.04368e+07	5.72695e+07	2.36809e+07	5.0224e+07	1.42918e+07	6.20987e+06	1.18411e+07	9.42011e+06	3.66673e+06	1.38202e+06	3.08605e+06	3.59629e+06	1.6679e+07	1.24796e+07	1.60827e+07	7.72916e+06	1.1173e+07	8.32068e+06	8.10196e+06	1.15825e+07	5.56142e+06	3.59109e+06	5.82647e+06	4.21598e+06	5.7534e+06	6.37363e+06	9.94758e+06	8.89759e+06	3.00575e+07	1.82555e+07	3.43139e+07	1.4265e+07	1.07173e+07	6.49905e+06	1.11623e+07
44	Isoleucine	C6 H13 N O2	132.102	6.496	99.8	Amino acids and related derivatives	DDA for preferred ion	86.1	Positive	[M+H]+1	5.3967e+07	5.96147e+07	4.52158e+07	5.52441e+07	8.38806e+07	8.48248e+07	5.69663e+07	9.04849e+07	3.26993e+08	2.40217e+08	3.26722e+08	3.93328e+08	1.73971e+08	1.21406e+08	1.58593e+08	1.35794e+08	7.13673e+07	6.608e+07	7.30561e+07	5.56191e+07	1.86225e+08	1.22841e+08	1.5924e+08	1.57888e+08	3.15263e+08	2.64637e+08	3.3171e+08	2.53864e+08	7.34146e+07	7.66341e+07	1.0918e+08	8.43407e+07	2.44681e+08	1.97354e+08	3.14066e+08	1.9952e+08	1.38205e+08	9.05406e+07	1.49868e+08
45	L-(+)-Citrulline	C6 H13 N3 O3	176.103	11.275	97.1	Amino acids and related derivatives	DDA for preferred ion	159.08	Positive	[M+H]+1	2.85279e+07	3.6212e+07	2.84265e+07	3.6202e+07	3.85008e+07	3.16206e+07	1.94306e+07	3.95884e+07	1.52175e+07	1.0057e+07	1.65062e+07	1.43409e+07	1.54763e+07	1.02751e+07	1.27479e+07	1.07702e+07	1.20919e+07	8.09321e+06	1.12473e+07	5.32998e+06	2.69164e+07	1.96866e+07	2.59909e+07	2.64523e+07	5.41434e+07	2.99396e+07	4.17374e+07	3.30413e+07	3.02867e+07	3.03173e+07	3.7877e+07	4.18425e+07	2.69667e+07	2.08014e+07	3.48315e+07	2.28443e+07	2.32033e+07	1.62081e+07	2.29982e+07
46	Lactamide	C3 H7 N O2	90.0554	9.035	97.4	Other endogenous metabolites	DDA for preferred ion	72.08	Positive	[M+H]+1	4.96353e+08	6.6393e+08	4.76304e+08	7.41542e+08	7.84209e+08	8.77694e+08	5.43875e+08	8.57086e+08	1.45721e+09	9.86276e+08	1.49195e+09	1.39931e+09	1.53251e+09	1.08118e+09	1.21814e+09	1.10204e+09	9.42613e+08	6.80916e+08	9.72856e+08	6.72661e+08	2.68004e+09	1.69064e+09	2.58142e+09	2.45282e+09	1.04196e+09	7.12729e+08	1.04402e+09	7.81036e+08	7.92026e+08	7.3771e+08	1.08696e+09	1.00982e+09	1.65225e+09	1.26262e+09	2.04637e+09	1.25578e+09	1.23288e+09	8.3908e+08	1.15868e+09
47	(2E)-3-(2-{[(2S,3R,4S,5S,6R)-3,4,5-trihydroxy-6-(hydroxymethyl)oxan-2-yl]oxy}phenyl)prop-2-enoic acid	C15 H18 O8	309.096	2.169	88.5	Other endogenous metabolites	DDA for preferred ion	147.04	Positive	[M+H]+1	487242	484899	429094	346593	2.62142e+06	2.27632e+06	3.06056e+06	2.67686e+06	1.10239e+06	1.15518e+06	1.59062e+06	1.44805e+06	1.95352e+06	1.40911e+06	1.22397e+06	1.99163e+06	885245	840628	896731	1.06106e+06	1.09027e+06	1.59766e+06	1.88775e+06	1.26555e+06	1.56896e+06	1.69157e+06	1.81833e+06	1.24211e+06	727761	1.14108e+06	912698	1.07408e+06	3.02869e+06	2.65325e+06	5.26548e+06	2.73569e+06	1.19605e+06	1.98681e+06	2.67185e+06
48	(2R,3S,4S,5R,6R)-5-{[(2S,3R,4R)-3,4-dihydroxy-4-(hydroxymethyl)oxolan-2-yl]oxy}-2-(hydroxymethyl)-6-[2-(4-hydroxyphenyl)ethoxy]oxane-3,4-diol	C19 H28 O11	455.152	5.295	94.6	Other endogenous metabolites	DDA for preferred ion	150.05	Positive	[M+H]+1	2.09919e+06	2.50758e+06	2.19356e+06	1.63722e+06	8.17663e+06	7.66332e+06	7.51302e+06	7.14759e+06	1.75511e+06	1.48417e+06	1.37778e+06	1.42595e+06	1.13484e+06	1.31818e+06	1.00352e+06	1.40677e+06	2.16396e+06	2.04127e+06	2.57451e+06	2.41218e+06	1.43329e+06	1.11843e+06	1.9548e+06	1.14974e+06	1.99763e+06	1.59242e+06	1.84111e+06	1.22727e+06	5.13383e+06	7.32499e+06	7.75041e+06	6.92523e+06	4.36956e+06	3.864e+06	5.14186e+06	3.41815e+06	653506	683734	437657
49	(2S,3S,4S,5R,6R)-6-[3-(benzoyloxy)-2-hydroxypropoxy]-3,4,5-trihydroxyoxane-2-carboxylic acid	C16 H20 O10	395.095	4.772	91	Other endogenous metabolites	DDA for preferred ion	219.06	Positive	[M+H]+1	2.40259e+06	3.72061e+06	2.07632e+06	2.50587e+06	6.52563e+06	8.19224e+06	2.05348e+06	8.03426e+06	1.41268e+06	645869	1.54508e+06	1.53159e+06	1.69911e+06	1.58329e+06	1.19605e+06	1.52113e+06	1.55509e+06	1.83563e+06	2.2059e+06	596516	1.75242e+06	1.55955e+06	1.93776e+06	1.74888e+06	1.50101e+06	586760	182239	559569	2.55186e+06	1.85828e+06	3.06209e+06	2.8837e+06	3.79287e+06	2.1656e+06	4.05976e+06	3.07353e+06	2.55743e+06	820171	2.91897e+06
50	(3R)-4,4-Dimethyl-2-oxotetrahydro-3-furanyl beta-D-glucopyranoside	C12 H20 O8	310.149	3.318	63.5	Other endogenous metabolites	DDA for preferred ion	131.07	Positive	[M+H]+1	3.6324e+06	4.19589e+06	3.85356e+06	3.58038e+06	2.57062e+06	2.70101e+06	2.54399e+06	2.53278e+06	2.12452e+06	1.87125e+06	2.35323e+06	2.09249e+06	3.6909e+06	3.21014e+06	3.88428e+06	3.45744e+06	2.55217e+06	2.01569e+06	1.96015e+06	2.04224e+06	5.58803e+06	5.28266e+06	6.43284e+06	5.48498e+06	3.48823e+06	3.19047e+06	3.8949e+06	3.64244e+06	1.51646e+06	1.73412e+06	1.86187e+06	1.77335e+06	2.05631e+06	2.16884e+06	3.16924e+06	2.14999e+06	2.83306e+06	2.77053e+06	2.69174e+06
51	1-Aminocyclohexanecarboxylic acid	C7 H13 N O2	144.102	7.024	95.1	Other endogenous metabolites	DDA for preferred ion	98.1	Positive	[M+H]+1	4.96441e+06	8.73597e+06	6.02786e+06	5.23412e+06	2.29445e+07	2.66229e+07	1.23817e+07	2.42171e+07	1.56323e+07	8.76456e+06	1.61748e+07	1.23108e+07	8.84796e+06	5.26434e+06	3.21886e+06	6.19817e+06	5.34363e+06	6.5363e+06	8.14652e+06	5.41174e+06	2.56223e+07	1.64141e+07	2.03429e+07	2.42473e+07	6.68352e+06	4.65188e+06	5.58036e+06	4.02721e+06	1.1675e+07	1.18862e+07	1.94416e+07	1.95921e+07	1.31571e+07	9.07299e+06	1.71781e+07	8.33478e+06	2.40925e+07	1.34531e+07	2.2162e+07
52	1H-1,2,3-Triazol-4-ol	C2 H3 N3 O	103.062	5.874	61.3	Other endogenous metabolites	DDA for preferred ion	84.04	Positive	[M+NH4]+1	343112	553013	279824	320538	3.30189e+07	3.3088e+07	2.12679e+07	3.1489e+07	420568	301844	417294	431254	576694	408219	445196	380421	2.38534e+06	2.00944e+06	2.41582e+06	1.81676e+06	588762	394182	718120	621180	410949	272908	462900	352679	268926	300226	410117	405299	355304	269803	416046	262399	577960	398373	567806
53	2-(8-Hydroxy-4a,8-dimethyldecahydro-2-naphthalenyl)acrylic acid	C15 H24 O3	235.169	1.925	78.1	Other endogenous metabolites	DDA for preferred ion	189.16	Positive	[M+H]+1	6.88813e+06	7.8149e+06	7.34967e+06	6.86633e+06	1.76961e+07	1.79778e+07	1.49529e+07	1.81343e+07	1.38102e+07	1.22623e+07	1.64047e+07	1.53609e+07	6.79684e+06	6.2488e+06	5.79604e+06	5.38601e+06	5.5373e+06	4.14268e+06	4.37549e+06	4.41061e+06	7.34358e+06	4.41762e+06	7.9452e+06	7.62488e+06	1.11005e+07	1.04585e+07	1.15182e+07	1.14424e+07	8.92234e+06	1.10123e+07	1.09387e+07	1.27169e+07	1.50047e+07	1.5735e+07	1.78049e+07	1.55501e+07	9.31609e+06	8.99169e+06	8.8053e+06
54	2-(hydroxymethyl)-6-{5-[3-(hydroxymethyl)-5-(3-hydroxypropyl)-7-methoxy-2,3-dihydro-1-benzofuran-2-yl]-2-methoxyphenoxy}oxane-3,4,5-triol	C26 H34 O11	545.199	2.809	91.8	Other endogenous metabolites	DDA for preferred ion	366.14	Positive	[M+H]+1	3.79761e+06	6.24779e+06	5.08767e+06	3.14918e+06	1.12546e+07	9.48399e+06	7.81799e+06	8.64925e+06	2.68715e+06	2.28803e+06	3.00256e+06	2.93184e+06	1.44075e+06	1.49452e+06	1.31362e+06	2.27782e+06	1.69841e+06	2.17308e+06	1.87539e+06	1.96762e+06	2.6162e+06	2.30972e+06	3.18098e+06	2.27492e+06	1.40281e+06	423050	1.38255e+06	790904	4.52813e+06	5.0531e+06	6.2237e+06	5.1377e+06	2.70162e+06	1.88154e+06	4.12454e+06	1.99205e+06	1.90753e+06	1.78069e+06	3.43405e+06
55	2,4-Dimethylbenzaldehyde	C9 H10 O	135.08	1.323	84.5	Other endogenous metabolites	DDA for preferred ion	107.09	Positive	[M+H]+1	1.84518e+06	2.43009e+06	2.0351e+06	1.50645e+06	3.64283e+06	3.21009e+06	2.33907e+06	3.21242e+06	2.78936e+06	2.75871e+06	2.42166e+06	4.54234e+06	2.4323e+06	1.90526e+06	4.06048e+06	1.8798e+06	3.06654e+06	1.84648e+06	1.82339e+06	2.06799e+06	3.02299e+06	2.21261e+06	234443	331819	1.96092e+06	1.58916e+06	4.6092e+06	2.19862e+06	141896	3.71507e+06	3.19894e+06	3.56885e+06	3.28488e+06	4.43394e+06	4.42158e+06	2.3645e+06	2.735e+06	1.82858e+06	2.6394e+06
56	2-Amino-3-methoxybenzoic acid	C8 H9 N O3	168.065	5.808	98.3	Other endogenous metabolites	DDA for preferred ion	150.05	Positive	[M+H]+1	3.25744e+07	4.48041e+07	3.54548e+07	3.61106e+07	8.2003e+07	9.04636e+07	5.66189e+07	8.53003e+07	1.16443e+08	7.30719e+07	1.17534e+08	1.16953e+08	8.45057e+07	5.59396e+07	5.91984e+07	5.82102e+07	5.16274e+07	4.12651e+07	6.08118e+07	4.39589e+07	8.49569e+07	5.73072e+07	9.76814e+07	8.64668e+07	4.56036e+07	3.33524e+07	4.70448e+07	3.75404e+07	5.41531e+07	5.49445e+07	8.17893e+07	7.95208e+07	7.86122e+07	5.76786e+07	1.03892e+08	6.03147e+07	8.82974e+07	6.90909e+07	9.40793e+07
57	2-Aminophenol	C6 H7 N O	110.06	1.964	98.3	Polyphenols	DDA for preferred ion	67.05	Positive	[M+H]+1	1.34495e+07	1.57539e+07	1.51194e+07	1.43728e+07	2.20497e+07	2.52008e+07	1.96889e+07	2.66259e+07	1.15328e+07	1.0118e+07	1.07902e+07	1.16666e+07	1.5054e+07	1.14856e+07	1.75272e+07	1.2648e+07	2.23107e+07	1.6509e+07	1.73681e+07	1.69103e+07	3.95872e+07	3.67619e+07	3.0965e+07	4.01719e+07	2.85926e+07	2.43104e+07	2.31958e+07	2.26462e+07	3.19896e+07	3.09943e+07	2.93433e+07	3.11951e+07	8.21025e+06	1.40918e+07	1.53699e+07	8.05381e+06	3.99852e+07	2.97882e+07	3.1626e+07
58	L-Cysteine	C3 H7 N O2 S	122.027	8.226	89	Amino acids and related derivatives	DDA for preferred ion	76.02	Positive	[M+H]+1	1.1488e+07	1.23454e+07	1.27812e+07	1.28854e+07	4.03183e+07	4.40237e+07	3.80658e+07	4.02907e+07	2.46061e+07	2.2426e+07	2.60436e+07	2.4733e+07	3.77002e+07	3.36952e+07	3.82202e+07	3.06795e+07	2.6318e+07	2.03319e+07	2.00503e+07	2.28805e+07	3.00363e+07	2.66975e+07	3.58846e+07	2.90692e+07	3.10403e+07	2.83772e+07	2.91565e+07	3.29255e+07	1.92513e+07	2.15555e+07	2.152e+07	2.23947e+07	4.34203e+07	4.52975e+07	5.77644e+07	4.70931e+07	1.79798e+07	1.64021e+07	1.60966e+07
59	L-Ergothioneine	C9 H15 N3 O2 S	230.096	8.792	87.3	Other endogenous metabolites	DDA for preferred ion	127.03	Positive	[M+H]+1	893404	1.17378e+06	967639	1.31629e+06	57578.1	52682.6	37039.9	46726.9	104425	41847.9	78179.5	93037.6	7.75402e+06	5.72457e+06	5.89775e+06	5.17984e+06	41666.6	63509.3	47616.9	39553.8	599531	622879	1.16879e+06	1.17405e+06	179812	41455.6	130750	125840	143114	137375	156273	110690	334968	350434	583441	222428	47152.2	38942.6	46058.8
60	Glutamic acid	C5 H9 N O4	148.06	9.949	99.9	Amino acids and related derivatives	DDA for preferred ion	84.04	Positive	[M+H]+1	1.40724e+09	9.03589e+08	8.06348e+08	9.5315e+08	9.38303e+08	1.01424e+09	8.74214e+08	9.64572e+08	1.05893e+09	8.59918e+08	1.14279e+09	1.00167e+09	1.1836e+09	9.3239e+08	1.05811e+09	8.98569e+08	6.70967e+08	5.0854e+08	6.62268e+08	6.12775e+08	7.80908e+08	4.66358e+08	9.44539e+08	7.92509e+08	1.17627e+09	9.84395e+08	1.14435e+09	1.05239e+09	1.42321e+09	1.42974e+09	1.74403e+09	1.73328e+09	7.97136e+08	7.25066e+08	9.47304e+08	7.18714e+08	9.03142e+08	7.43992e+08	8.01735e+08
61	L-Glutamine	C5 H10 N2 O3	147.076	10.525	99.7	Amino acids and related derivatives	DDA for preferred ion	130.05	Positive	[M+H]+1	3.70518e+09	4.70307e+09	3.66971e+09	4.63007e+09	7.11166e+09	1.0596e+10	6.12047e+09	6.99453e+09	9.10586e+09	7.15109e+09	9.27038e+09	1.31697e+10	1.34532e+10	7.0879e+09	1.12169e+10	7.11787e+09	4.49365e+09	3.81345e+09	4.68439e+09	3.98783e+09	1.16036e+10	8.87682e+09	1.20301e+10	1.16469e+10	1.71361e+10	9.66439e+09	1.15967e+10	9.70257e+09	7.38788e+09	1.10124e+10	9.1601e+09	9.32026e+09	9.33329e+09	7.72408e+09	1.1296e+10	8.05825e+09	7.95732e+09	6.10807e+09	7.52253e+09
62	Histidine	C6 H9 N3 O2	156.077	14.012	99.7	Amino acids and related derivatives	DDA for preferred ion	110.07	Positive	[M+H]+1	6.63249e+07	7.47623e+07	7.48566e+07	8.35295e+07	9.14786e+07	2.17424e+08	9.94942e+07	6.88202e+07	7.55576e+08	2.90634e+08	7.80468e+08	7.64763e+08	3.7141e+08	2.95219e+08	3.34747e+08	3.15292e+08	1.61431e+08	1.06164e+08	1.18317e+08	1.17948e+08	3.85018e+08	2.76876e+08	4.40155e+08	3.69392e+08	8.15807e+08	7.37009e+08	8.85091e+08	7.94106e+08	1.69682e+08	1.88272e+08	1.79392e+08	1.02498e+08	5.71814e+08	5.68884e+08	7.87335e+08	5.02175e+08	1.13474e+08	2.47381e+08	9.11557e+07
63	L-Norleucine	C6 H13 N O2	132.102	6.141	99.8	Organic acids	DDA for preferred ion	86.1	Positive	[M+H]+1	5.15033e+08	6.35955e+08	3.55205e+08	4.54771e+08	4.92043e+08	6.46248e+08	1.27539e+08	6.4075e+08	9.00063e+08	5.53817e+08	9.76124e+08	1.02166e+09	6.02662e+08	3.69982e+08	4.30159e+08	4.49375e+08	3.78046e+08	3.28694e+08	4.39238e+08	1.88385e+08	7.93755e+08	5.82249e+08	7.41159e+08	7.90874e+08	8.06964e+08	1.29473e+08	6.87535e+08	4.47276e+08	4.63361e+08	3.88511e+08	6.99681e+08	6.90961e+08	5.041e+08	3.36269e+08	7.1164e+08	3.2196e+08	6.19451e+08	3.28477e+08	6.19566e+08
64	Phenylalanine	C9 H11 N O2	166.086	6.222	98.6	Amino acids and related derivatives	DDA for preferred ion	120.08	Positive	[M+H]+1	1.23372e+08	1.08686e+08	1.78149e+07	1.06686e+08	2.42342e+08	3.6882e+08	4.25061e+07	3.64052e+08	1.06222e+09	5.25709e+08	9.70196e+08	1.51104e+09	3.39379e+08	8.18078e+07	2.71313e+08	4.15249e+08	8.35117e+07	7.63911e+07	6.9018e+07	1.72842e+07	3.29104e+08	3.13117e+08	9.6405e+07	2.65526e+08	7.22785e+08	4.14191e+08	1.05313e+09	6.25945e+08	3.15997e+08	8.06673e+07	2.89699e+08	2.93893e+08	4.40554e+08	1.35499e+08	9.38426e+08	2.78894e+08	4.93386e+08	9.69357e+07	5.07685e+08
65	L-Pyroglutamic acid	C5 H7 N O3	130.05	10.52	98.6	Amino acids and related derivatives	DDA for preferred ion	84.04	Positive	[M+H]+1	3.07511e+09	3.7094e+09	3.67624e+09	4.48537e+09	5.66728e+09	8.1307e+09	4.98707e+09	5.45165e+09	7.1542e+09	5.58851e+09	7.36683e+09	7.07506e+09	7.22589e+09	5.74344e+09	6.26037e+09	8.20096e+09	5.22228e+09	3.07158e+09	3.74135e+09	3.25075e+09	9.09614e+09	7.09286e+09	1.35257e+10	1.31196e+10	9.02894e+09	7.83725e+09	1.1153e+10	7.79631e+09	6.02536e+09	6.06188e+09	7.15998e+09	7.43028e+09	7.31304e+09	6.28935e+09	1.20053e+10	6.38086e+09	8.96264e+09	4.90396e+09	5.84965e+09
66	L-Threonine	C4 H9 N O3	120.066	9.558	98.6	Amino acids and related derivatives	DDA for preferred ion	56.05	Positive	[M+H]+1	2.1306e+08	2.56428e+08	2.53073e+08	2.62546e+08	3.58133e+08	3.77462e+08	3.40492e+08	3.47194e+08	6.47927e+08	4.71976e+08	6.2837e+08	6.50196e+08	5.49925e+08	4.20024e+08	4.94428e+08	4.17508e+08	3.07498e+08	2.29958e+08	2.6992e+08	2.43349e+08	8.52739e+08	6.0694e+08	8.90657e+08	7.47896e+08	6.06213e+08	6.04263e+08	7.00107e+08	5.91703e+08	4.6023e+08	4.50577e+08	5.4155e+08	5.70214e+08	6.17732e+08	5.43771e+08	8.6622e+08	5.72875e+08	3.90735e+08	3.26809e+08	3.56422e+08
67	L-Tyrosine	C9 H11 N O3	182.081	7.826	99.9	Amino acids and related derivatives	DDA for preferred ion	136.07	Positive	[M+H]+1	3.29409e+08	4.54953e+08	4.01146e+08	4.43532e+08	4.80579e+08	4.26442e+08	4.98034e+08	3.94311e+08	1.27858e+09	1.11481e+09	1.48805e+09	1.29595e+09	9.69731e+08	7.12811e+08	7.67076e+08	5.92419e+08	5.39935e+08	4.31375e+08	5.84605e+08	5.2887e+08	6.38358e+08	4.24721e+08	9.05416e+08	7.12674e+08	2.04587e+09	1.81191e+09	2.29985e+09	1.93084e+09	1.0463e+09	1.19233e+09	1.39778e+09	1.55503e+09	1.01165e+09	8.5516e+08	1.14587e+09	9.19504e+08	1.17255e+09	1.12974e+09	1.07607e+09
68	L-Tyrosine methyl ester	C10 H13 N O3	196.097	3.9	60.9	Amino acids and related derivatives	DDA for preferred ion	153.08	Positive	[M+H]+1	2.02388e+06	3.36581e+06	2.0707e+06	1.71092e+06	5.71354e+06	6.34945e+06	6.54819e+06	5.79592e+06	5.86109e+06	4.07687e+06	4.76002e+06	5.99336e+06	5.21143e+06	3.34972e+06	4.40804e+06	2.82032e+06	3.97709e+06	3.08439e+06	4.84221e+06	2.98327e+06	5.59252e+06	3.35165e+06	6.383e+06	5.51131e+06	6.07324e+06	6.66885e+06	6.76571e+06	4.76356e+06	5.09937e+06	5.16528e+06	7.49319e+06	8.12166e+06	3.53751e+06	2.82605e+06	4.78952e+06	2.60884e+06	4.61827e+06	3.0868e+06	4.63166e+06
69	Melezitose	C18 H32 O16	527.158	13.275	96.4	Other endogenous metabolites	DDA for preferred ion	145.05	Positive	[M+Na]+1	1.85138e+08	2.06752e+08	1.83973e+08	1.86918e+08	1.51277e+08	1.48349e+08	1.72793e+08	1.39652e+08	1.50963e+08	1.42473e+08	1.71416e+08	1.38916e+08	2.74486e+08	2.2756e+08	2.36125e+08	2.41401e+08	1.67763e+08	1.46073e+08	1.63463e+08	1.76522e+08	1.98994e+08	1.78475e+08	2.17058e+08	2.12857e+08	2.33079e+08	2.2974e+08	2.38563e+08	2.4121e+08	1.40533e+08	1.73684e+08	1.57936e+08	1.63333e+08	2.10844e+08	2.07409e+08	2.09326e+08	1.94228e+08	1.59509e+08	1.74157e+08	1.56897e+08
70	Methyl yellow	C14 H15 N3	226.134	1.277	97.5	Other endogenous metabolites	DDA for preferred ion	91.05	Positive	[M+H]+1	1.88243e+06	2.80947e+06	2.01605e+06	2.08739e+06	74392.4	78972.8	57366.7	72151.6	1.04616e+08	4.76986e+07	8.83076e+07	7.63858e+07	2.6003e+07	1.36102e+07	1.899e+07	1.64165e+07	71344.1	63730.6	65076.3	71430.2	123068	88801.3	153453	130741	3.03112e+07	2.93596e+07	3.77579e+07	3.02418e+07	57361.6	67965.7	71482.3	79929.7	3.95426e+07	2.68907e+07	5.42763e+07	2.41005e+07	7.96866e+07	5.12577e+07	7.97569e+07
71	Methylimidazoleacetic acid	C6 H8 N2 O2	141.066	5.391	69.5	Other endogenous metabolites	DDA for preferred ion	114.06	Positive	[M+H]+1	6.16396e+07	8.96913e+07	6.64812e+07	5.91692e+07	7.22081e+07	7.64407e+07	5.07145e+07	7.16392e+07	1.72098e+07	1.19298e+07	2.07478e+07	1.95753e+07	2.61993e+07	1.55276e+07	1.81199e+07	1.58725e+07	2.73857e+07	2.24085e+07	3.56527e+07	2.24364e+07	2.64221e+07	1.75505e+07	2.82905e+07	2.68191e+07	2.94392e+07	2.11008e+07	3.55923e+07	2.21186e+07	2.97025e+07	2.96014e+07	4.5058e+07	4.62814e+07	2.06111e+07	1.43511e+07	2.74858e+07	1.45848e+07	4.45251e+07	2.84388e+07	4.23361e+07
72	Miquelianin	C21 H18 O13	479.082	5.002	97.1	Polyphenols	DDA for preferred ion	303.05	Positive	[M+H]+1	2.65789e+08	3.25741e+08	2.58255e+08	2.68158e+08	8.84504e+07	1.09872e+08	4.62184e+07	1.03426e+08	1.35343e+08	9.59459e+07	1.37103e+08	1.27306e+08	5.07208e+07	5.07896e+07	5.24578e+07	4.81555e+07	2.02516e+07	1.54535e+07	1.27431e+07	9.1386e+06	4.24485e+07	3.81407e+07	4.86808e+07	4.23486e+07	7.04081e+07	4.24288e+07	4.6516e+07	4.76051e+07	8.41979e+07	7.33144e+07	7.36113e+07	7.81413e+07	1.73979e+08	1.40772e+08	2.85053e+08	1.61187e+08	5.89474e+07	4.34027e+07	6.76146e+07
73	2-Pyridylacetic acid	C7 H7 N O2	138.055	2.437	73.2	Other endogenous metabolites	DDA for preferred ion	120.04	Positive	[M+H]+1	1.84765e+07	1.99493e+07	1.86235e+07	1.92424e+07	3.03293e+06	3.99711e+06	2.46903e+06	4.21973e+06	1.12612e+07	7.24882e+06	9.53052e+06	1.10398e+07	1.08162e+07	8.53856e+06	1.05161e+07	9.28325e+06	1.32484e+07	9.63669e+06	8.69686e+06	8.01679e+06	7.85436e+07	7.01635e+07	8.08014e+07	8.68567e+07	3.66757e+06	2.44577e+06	3.57812e+06	2.03085e+06	1.0017e+08	7.73087e+07	9.16388e+07	1.09224e+08	3.48442e+06	2.10987e+06	2.74625e+06	1.70442e+06	8.07646e+06	4.87882e+06	7.47017e+06
74	3-(3,4-dihydroxyphenyl)propanoic acid	C9 H10 O4	182.081	7.831	90.8	Other endogenous metabolites	DDA for preferred ion	123.04	Positive	[M+NH4]+1	3.29409e+08	4.54953e+08	4.01146e+08	4.43532e+08	4.80579e+08	4.26442e+08	4.98034e+08	3.94311e+08	1.27858e+09	1.11481e+09	1.48805e+09	1.29595e+09	9.69731e+08	7.12811e+08	7.67076e+08	5.92419e+08	5.39935e+08	4.31375e+08	5.84605e+08	5.2887e+08	6.38358e+08	4.24721e+08	9.05416e+08	7.12674e+08	2.04587e+09	1.81191e+09	2.29985e+09	1.93084e+09	1.0463e+09	1.19233e+09	1.39778e+09	1.55503e+09	1.01165e+09	8.5516e+08	1.14587e+09	9.19504e+08	1.17255e+09	1.12974e+09	1.07607e+09
75	3-(3-methylbut-2-en-1-yl)-3H-purin-6-amine	C10 H13 N5	204.124	1.856	91.5	Other endogenous metabolites	DDA for preferred ion	136.06	Positive	[M+H]+1	191168	350453	304321	270454	195544	1.12324e+06	169473	1.8972e+06	7.03983e+06	5.15231e+06	5.78233e+06	5.49332e+06	1.34424e+07	9.13561e+06	7.18614e+06	6.78427e+06	6.20114e+06	4.92733e+06	5.32328e+06	5.51091e+06	1.18367e+07	7.66773e+06	1.24798e+07	1.51847e+07	5.03564e+06	3.80998e+06	5.54554e+06	4.12024e+06	49248.5	93363.9	60386.9	61705.3	4.30292e+06	2.56018e+06	3.55349e+06	1.99813e+06	2.81417e+07	2.01716e+07	2.94602e+07
76	3-Indoleacetonitrile	C10 H8 N2	157.076	6.423	68.8	Other endogenous metabolites	DDA for preferred ion	130.06	Positive	[M+H]+1	1.35196e+06	2.37233e+06	2.19232e+06	1.75959e+06	1.84094e+06	1.97991e+06	3.86411e+06	1.71856e+06	4.17983e+06	3.91638e+06	3.95268e+06	3.93773e+06	2.67363e+06	2.83417e+06	1.99695e+06	1.80528e+06	1.35019e+06	1.4919e+06	2.68048e+06	3.04132e+06	4.48346e+06	3.1836e+06	5.94649e+06	4.83031e+06	3.21664e+06	8.66586e+06	4.51263e+06	4.08867e+06	1.70751e+06	2.66756e+06	2.90737e+06	2.63251e+06	1.31235e+06	1.19988e+06	1.11395e+06	1.31352e+06	1.64177e+06	2.19919e+06	1.55138e+06
77	3-Methoxycinnamic acid	C10 H10 O3	161.06	4.12	88.7	Polyphenols	DDA for preferred ion	116.07	Positive	[M+H]+1	3.30848e+06	5.78735e+06	4.70204e+06	3.29251e+06	1.02138e+07	1.02266e+07	7.33191e+06	9.1455e+06	5.15042e+06	4.75027e+06	5.88916e+06	5.15349e+06	2.71036e+06	2.8665e+06	2.06496e+06	3.25917e+06	2.73084e+06	2.90777e+06	3.48043e+06	4.0618e+06	4.10682e+06	3.53596e+06	6.97667e+06	4.04337e+06	4.14745e+06	3.80987e+06	4.80244e+06	3.24124e+06	3.30765e+06	4.05555e+06	4.76059e+06	4.87216e+06	5.48215e+06	3.86029e+06	8.61745e+06	4.46843e+06	4.1704e+06	3.78599e+06	5.79732e+06
78	Myclobutanil	C15 H17 Cl N4	289.121	1.278	65.6	Exogenous substances	DDA for preferred ion	70.04	Positive	[M+H]+1	1.14605e+07	1.51222e+07	1.1069e+07	1.15785e+07	69500.1	73779.3	53594.1	67406.7	61794	46220	56792.8	62229.2	74307.6	59660.4	73554.2	61148.7	66652.3	59539.5	60796.7	66732.8	9.59276e+06	8.63768e+06	1.50807e+07	1.02975e+07	72732.4	64931.1	86712.2	60900.8	53589.4	63496.1	66781.4	74673.3	56744.3	43698.2	88842	59725.1	120115	112887	75667.8
79	N6,N6,N6-Trimethyl-L-lysine	C9 H20 N2 O2	189.16	12.987	98.8	Other endogenous metabolites	DDA for preferred ion	130.08	Positive	[M+H]+1	5.59104e+07	7.2673e+07	4.35966e+07	7.76732e+07	1.07373e+08	1.11279e+08	9.28518e+07	1.06475e+08	1.5969e+08	1.18284e+08	1.27946e+08	1.48759e+08	1.50256e+08	7.97898e+07	1.25863e+08	1.10358e+08	4.86079e+07	5.05498e+07	6.99365e+07	5.35268e+07	1.33026e+08	9.21603e+07	1.58615e+08	1.34372e+08	1.79111e+08	1.48145e+08	2.09521e+08	1.6569e+08	9.73902e+07	1.06799e+08	1.21279e+08	1.27915e+08	1.08166e+08	9.71623e+07	1.57702e+08	1.00051e+08	9.95414e+07	8.17368e+07	9.28186e+07
80	N6-Acetyl-L-lysine	C8 H16 N2 O3	189.123	9.444	97.3	Amino acids and related derivatives	DDA for preferred ion	126.09	Positive	[M+H]+1	2.49123e+07	3.39147e+07	2.81303e+07	3.60051e+07	2.37516e+07	2.49219e+07	1.92951e+07	2.36482e+07	4.1879e+07	3.06792e+07	4.48642e+07	3.98187e+07	4.70324e+07	3.29037e+07	3.77653e+07	3.12805e+07	2.86912e+07	2.04042e+07	2.88552e+07	2.15008e+07	5.60028e+07	3.64713e+07	6.52285e+07	5.71632e+07	5.76105e+07	4.16663e+07	6.69778e+07	5.16721e+07	3.44502e+07	3.76316e+07	4.83167e+07	4.92314e+07	4.09438e+07	3.50755e+07	6.12822e+07	3.55706e+07	5.07844e+07	4.08345e+07	4.62886e+07
81	N-Acetylputrescine	C6 H14 N2 O	131.118	6.626	88.7	Other endogenous metabolites	DDA for preferred ion	114.09	Positive	[M+H]+1	1.50252e+07	2.60603e+07	1.77716e+07	1.48676e+07	1.15541e+07	1.02716e+07	5.43078e+06	1.17658e+07	2.20183e+07	1.39805e+07	2.05762e+07	2.03827e+07	2.13726e+07	1.31816e+07	1.3182e+07	1.16438e+07	1.22703e+07	1.13733e+07	1.66284e+07	1.1334e+07	1.29237e+07	7.91915e+06	1.55527e+07	1.35492e+07	7.92297e+07	3.82501e+07	8.84681e+07	5.09306e+07	4.28874e+07	4.98701e+07	8.10439e+07	7.69302e+07	1.54395e+07	1.10311e+07	1.53104e+07	1.06712e+07	2.33448e+07	1.50508e+07	2.14844e+07
82	Nicotinamide	C6 H6 N2 O	123.055	7.829	91.5	Vitamins	DDA for preferred ion	95.05	Positive	[M+H]+1	8.57523e+07	1.16447e+08	8.81709e+07	1.22086e+08	6.54573e+07	7.04458e+07	4.2898e+07	6.85039e+07	7.99775e+07	6.12036e+07	7.13153e+07	7.61505e+07	1.08445e+08	7.90348e+07	8.9515e+07	8.33926e+07	1.56461e+08	1.30647e+08	1.59819e+08	1.21776e+08	9.79239e+07	7.8341e+07	1.12341e+08	1.01807e+08	5.77662e+07	4.69257e+07	5.77674e+07	4.58251e+07	2.81414e+07	2.57062e+07	3.09707e+07	3.49318e+07	4.50545e+07	3.08665e+07	6.02596e+07	3.3807e+07	5.30372e+07	3.96764e+07	5.42442e+07
83	Norepinephrine	C8 H11 N O3	170.081	3.55	98	Exogenous substances	DDA for preferred ion	152.07	Positive	[M+H]+1	1.80814e+08	2.73317e+08	1.95795e+08	1.85301e+08	9.86907e+07	1.07882e+08	7.15769e+07	1.04204e+08	1.45402e+08	9.78065e+07	1.49279e+08	1.46302e+08	7.48473e+07	5.09412e+07	5.96794e+07	4.7371e+07	5.10714e+07	3.69662e+07	5.67914e+07	3.31926e+07	1.10187e+08	6.94883e+07	1.32034e+08	1.06552e+08	1.31045e+08	1.07333e+08	1.55965e+08	1.03273e+08	3.16543e+07	3.00509e+07	4.93775e+07	5.20248e+07	5.45491e+07	4.18307e+07	7.35352e+07	3.94274e+07	1.35304e+08	8.60489e+07	1.19765e+08
84	O-Acetylserine	C5 H9 N O4	148.06	7.598	69.9	Amino acids and related derivatives	DDA for preferred ion	123.96	Positive	[M+H]+1	3.15342e+07	2.62427e+07	3.15235e+07	2.201e+07	1.14997e+07	3.29655e+07	3.07001e+07	1.34417e+07	3.97847e+07	1.41225e+07	4.89489e+07	3.39252e+07	4.26812e+07	4.51754e+07	4.98458e+07	4.69355e+07	5.27016e+07	1.7598e+07	5.3674e+07	5.05637e+07	1.55068e+07	3.61643e+07	7.91119e+07	6.93617e+07	8.90548e+07	1.06136e+08	7.88574e+07	6.43067e+07	2.50881e+07	6.76463e+06	2.96666e+07	3.8936e+07	3.82289e+07	2.15271e+07	5.51704e+07	3.41991e+07	3.24367e+07	3.54166e+07	2.6123e+07
85	Palmitic Acid	C16 H32 O2	274.274	2.34	81.7	Other endogenous metabolites	DDA for preferred ion	192.07	Positive	[M+H]+1	1.63158e+06	2.46853e+06	1.69715e+06	2.00269e+06	923965	800082	873779	1.6253e+06	981078	1.26924e+06	1.77592e+06	1.73104e+06	1.59778e+07	2.48129e+06	6.08114e+06	694814	2.01179e+06	2.17437e+06	1.34049e+06	1.60106e+06	961736	584038	1.06063e+06	918700	772530	981458	1.10995e+06	746854	706373	580125	710488	907037	1.54406e+06	3.30185e+06	4.95915e+06	2.56693e+06	1.11904e+06	1.02529e+06	1.43599e+06
86	Picolinic acid	C6 H5 N O2	124.039	3.75	99.4	Other endogenous metabolites	DDA for preferred ion	80.05	Positive	[M+H]+1	6.12699e+08	8.13521e+08	5.65338e+08	6.4067e+08	6.06103e+08	7.71183e+08	2.6914e+08	7.64795e+08	7.09092e+08	4.46556e+08	6.83993e+08	7.0243e+08	6.08912e+08	4.15483e+08	4.93984e+08	4.382e+08	3.09383e+08	2.67928e+08	3.56258e+08	1.52768e+08	1.07412e+09	7.8295e+08	1.0553e+09	1.10812e+09	7.2465e+08	3.11081e+08	6.7812e+08	5.22345e+08	5.29918e+08	5.22117e+08	7.37553e+08	7.83504e+08	2.53202e+08	1.77095e+08	3.35733e+08	1.75439e+08	4.01249e+08	2.38367e+08	3.52768e+08
87	Pyraclostrobin	C19 H18 Cl N3 O4	388.106	1.238	89.8	Exogenous substances	DDA for preferred ion	163.06	Positive	[M+H]+1	350571	450153	533400	246923	5.78732e+06	6.43026e+06	5.1207e+06	6.0448e+06	76507.7	56852	76145.5	74874.2	86635.8	69921.2	78956.5	66933.1	2.53225e+07	1.62451e+07	1.41546e+07	2.09392e+07	259726	183057	727113	345319	89425.5	82271.2	99498.5	65169.9	2.04473e+06	2.84167e+06	3.45294e+06	5.32072e+06	84506.1	58009.3	113516	63477.7	95200	70758	94996.8
88	Pyrogallol	C6 H6 O3	127.039	10.249	89.8	Polyphenols	DDA for preferred ion	109.03	Positive	[M+H]+1	6.78896e+08	5.11133e+08	6.99111e+08	4.59054e+08	4.16747e+08	3.74526e+08	6.1201e+08	3.70336e+08	5.87826e+08	7.15274e+08	6.11296e+08	5.65459e+08	6.86648e+08	8.13447e+08	8.69605e+08	8.43062e+08	6.4924e+08	5.73262e+08	3.89939e+08	6.00527e+08	5.05414e+08	7.14016e+08	6.62858e+08	6.00618e+08	6.93811e+08	1.03572e+09	5.90106e+08	9.72128e+08	6.04241e+08	6.03368e+08	3.83462e+08	5.03639e+08	5.28633e+08	7.17947e+08	6.42552e+08	7.20835e+08	5.38143e+08	7.10978e+08	4.22779e+08
89	Spermine	C10 H26 N4	203.223	17.638	81.4	Other endogenous metabolites	DDA for preferred ion	129.14	Positive	[M+H]+1	1.47213e+06	3.58012e+06	4.63621e+06	2.59903e+06	4.39364e+06	2.62007e+06	1.03471e+07	2.52152e+06	4.88646e+06	4.73092e+06	6.86654e+06	2.98942e+06	5.60025e+06	4.6138e+06	2.88246e+06	2.55462e+06	3.86665e+06	1.87891e+06	7.30717e+06	7.80881e+06	3.62915e+06	1.78663e+06	1.2131e+07	5.21844e+06	5.61272e+06	7.41244e+06	1.67652e+07	8.51953e+06	757814	7.03596e+06	7.47827e+06	6.58966e+06	5.18122e+06	8.09015e+06	3.1969e+06	6.13502e+06	4.22494e+06	7.29425e+06	3.68502e+06
90	Stearamide	C18 H37 N O	284.294	1.232	95.8	Other endogenous metabolites	DDA for preferred ion	97.1	Positive	[M+H]+1	7.06067e+07	1.15415e+08	8.94251e+07	1.17157e+08	1.22688e+08	1.61692e+08	9.2061e+07	1.08497e+08	1.10863e+08	7.67826e+07	1.01637e+08	1.2936e+08	9.25188e+07	9.36285e+07	1.31312e+08	7.68515e+07	1.11548e+08	7.60707e+07	6.57875e+07	1.2141e+08	8.82475e+07	6.98443e+07	1.1042e+08	9.8314e+07	9.22079e+07	1.42115e+08	1.34975e+08	7.37748e+07	9.32726e+07	1.38036e+08	1.18817e+08	1.22439e+08	1.4182e+08	7.59583e+07	2.13293e+08	1.11888e+08	1.10429e+08	6.42155e+07	9.80658e+07
91	Taxifolin	C15 H12 O7	305.065	2.05	93.5	Vitamins	DDA for preferred ion	153.02	Positive	[M+H]+1	2.55862e+06	1.90663e+06	3.07591e+06	2.8985e+06	52061.9	79933.3	104011	52186.9	2.52057e+06	2.79612e+06	2.62631e+06	2.35463e+06	117384	202657	207261	126486	112919	96272.3	212037	152593	120419	272774	77642.4	73848	136120	370231	186775	185822	362935	377388	295781	240009	55994.5	42983	62867.4	41937.1	56002.2	46109.6	53009.7
92	Thymine	C5 H6 N2 O2	127.05	2.454	92.6	Other endogenous metabolites	DDA for preferred ion	110.02	Positive	[M+H]+1	629600	635593	286048	734323	705886	652089	884385	1.26912e+06	496207	878802	823278	933764	1.52438e+06	1.56053e+06	1.64013e+06	1.55139e+06	1.64791e+07	1.39016e+07	1.252e+07	1.6008e+07	2.60463e+06	2.65642e+06	2.61339e+06	2.33398e+06	813242	90579.9	224433	176865	719868	228227	433991	220800	1.80978e+06	1.89251e+06	1.38344e+06	1.12768e+06	728815	681913	517405
93	Tiliroside	C30 H26 O13	595.144	2.17	97.1	Polyphenols	DDA for preferred ion	147.04	Positive	[M+H]+1	7.37816e+06	6.54183e+06	5.8919e+06	4.00088e+06	5.17213e+07	4.71046e+07	5.69857e+07	5.2014e+07	2.22674e+07	2.41773e+07	3.48739e+07	3.16517e+07	3.54174e+07	2.53253e+07	2.29841e+07	3.23958e+07	1.31939e+07	1.22268e+07	1.46291e+07	1.94072e+07	2.53545e+07	2.42395e+07	3.07427e+07	2.28431e+07	2.876e+07	2.99945e+07	3.5772e+07	2.22989e+07	1.44354e+07	2.28865e+07	1.92683e+07	2.23685e+07	5.75504e+07	5.09859e+07	9.80731e+07	5.60258e+07	2.2387e+07	3.59396e+07	4.9957e+07
94	trans-3-Indoleacrylic acid	C11 H9 N O2	188.071	6.421	93.9	Other endogenous metabolites	DDA for preferred ion	146.06	Positive	[M+H]+1	6.80254e+07	8.45889e+07	8.60953e+07	7.20916e+07	6.65021e+07	6.4822e+07	9.66043e+07	6.31067e+07	1.51e+08	1.35411e+08	1.47087e+08	1.44121e+08	9.96812e+07	9.45739e+07	8.66277e+07	7.92058e+07	6.50498e+07	6.50999e+07	7.9482e+07	1.07061e+08	1.89137e+08	1.48543e+08	2.09722e+08	2.10729e+08	1.07076e+08	1.59561e+08	1.18012e+08	1.31421e+08	8.12261e+07	9.79388e+07	9.98285e+07	9.69865e+07	4.75987e+07	5.37801e+07	4.58012e+07	4.85179e+07	6.98818e+07	8.19317e+07	6.82759e+07
95	trans-Cinnamaldehyde	C9 H8 O	133.065	5.591	62.5	Other endogenous metabolites	DDA for preferred ion	105.07	Positive	[M+H]+1	1.25063e+06	1.77521e+06	1.39854e+06	183131	1.61368e+06	826481	188420	1.11939e+06	5.82903e+08	2.89052e+08	4.53319e+08	5.81447e+08	488348	353519	387513	327981	450156	569099	1.18709e+06	606913	639824	807282	1.32607e+06	1.87909e+06	8.32862e+06	1.64454e+06	8.33102e+06	4.60459e+06	1.43907e+07	1.3789e+07	1.95086e+07	1.57938e+07	1.11791e+07	9.33385e+06	2.12229e+07	8.45484e+06	4.18128e+06	3.21358e+06	4.16572e+06
96	Tridemorph	C19 H39 N O	298.31	1.233	93.7	Exogenous substances	DDA for preferred ion	184.1	Positive	[M+H]+1	2.46523e+06	4.61959e+06	3.2005e+06	3.67657e+06	4.13746e+06	5.53638e+06	3.385e+06	3.88986e+06	3.99508e+06	2.71857e+06	3.70662e+06	3.95549e+06	3.64218e+06	3.28598e+06	4.59819e+06	3.0626e+06	4.09188e+06	3.00133e+06	2.32184e+06	4.153e+06	2.99663e+06	2.51757e+06	3.5087e+06	3.45101e+06	3.30858e+06	4.86757e+06	4.13945e+06	2.82062e+06	3.37722e+06	4.59691e+06	4.06256e+06	4.36029e+06	4.8302e+06	2.73153e+06	7.07095e+06	3.52797e+06	3.81495e+06	2.57663e+06	3.61502e+06
97	Trifolin	C21 H20 O11	449.107	2.824	94.4	Polyphenols	DDA for preferred ion	287.05	Positive	[M+H]+1	1.06932e+07	9.58698e+06	7.53958e+06	5.56274e+06	2.26203e+07	2.26925e+07	1.87344e+07	2.35234e+07	1.25713e+07	1.385e+07	1.76548e+07	1.53042e+07	2.62921e+07	1.88949e+07	1.72358e+07	2.50295e+07	1.93251e+07	1.73734e+07	1.44772e+07	1.67974e+07	2.22225e+07	2.54893e+07	3.05849e+07	1.95621e+07	1.24081e+07	1.69249e+07	1.25231e+07	1.32609e+07	1.47043e+07	1.52728e+07	1.50477e+07	1.21996e+07	1.17549e+07	1.04515e+07	2.05083e+07	1.06975e+07	1.03814e+07	1.09406e+07	1.26656e+07
98	Trigonelline	C7 H7 N O2	138.055	1.387	99.5	Other endogenous metabolites	DDA for preferred ion	121.04	Positive	[M+H]+1	5.96159e+06	6.38018e+06	5.25525e+06	6.48531e+06	2.9216e+06	1.84183e+06	2.38975e+06	2.22148e+06	7.22389e+06	3.29457e+06	5.7927e+06	5.33026e+06	6.03597e+06	3.96507e+06	4.573e+06	4.7218e+06	8.2257e+06	6.31152e+06	6.35776e+06	3.94112e+06	1.87108e+07	1.63152e+07	1.87576e+07	1.84442e+07	9.19424e+06	7.48062e+06	8.66993e+06	8.25537e+06	8.79212e+06	8.97173e+06	1.0345e+07	1.25115e+07	2.38251e+06	3.30349e+06	1.12317e+06	2.38833e+06	7.25544e+06	4.59954e+06	6.18575e+06
99	Uracil	C4 H4 N2 O2	113.035	3.729	82.3	Other endogenous metabolites	DDA for preferred ion	70.03	Positive	[M+H]+1	6.59153e+06	6.98561e+06	5.88882e+06	7.14244e+06	1.28245e+07	1.40655e+07	133056	1.38639e+07	1.44718e+07	9.61518e+06	1.50356e+07	1.35055e+07	1.04507e+07	8.25712e+06	1.11717e+07	8.48143e+06	1.58348e+07	1.16783e+07	9.8755e+06	3.22886e+06	9.91546e+06	1.09514e+07	9.69273e+06	1.19271e+07	5.1801e+06	1.15557e+06	3.11435e+06	3.40362e+06	3.87745e+06	3.15617e+06	4.02646e+06	4.79038e+06	9.50184e+06	5.80729e+06	1.65195e+07	6.39116e+06	2.96259e+06	1.10663e+06	2.81453e+06
100	Valine	C5 H11 N O2	118.086	7.396	99	Amino acids and related derivatives	DDA for preferred ion	72.08	Positive	[M+H]+1	6.49554e+08	8.28937e+08	5.97243e+08	6.39367e+08	7.79233e+08	9.15308e+08	6.69216e+08	7.67188e+08	1.9325e+09	1.29946e+09	1.88038e+09	1.82781e+09	2.10576e+09	1.5732e+09	1.78324e+09	1.61886e+09	1.45783e+09	1.16887e+09	1.49785e+09	8.45744e+08	2.12598e+09	1.65887e+09	2.22949e+09	2.33493e+09	2.22898e+09	1.13447e+09	2.12429e+09	1.71624e+09	6.27269e+08	5.67779e+08	7.69367e+08	8.12839e+08	2.04982e+09	1.53226e+09	2.66361e+09	1.55685e+09	1.38914e+09	8.97172e+08	1.32927e+09
101	Xanthurenic acid	C10 H7 N O4	206.045	6.127	74.5	Amino acids and related derivatives	DDA for preferred ion	178.05	Positive	[M+H]+1	1.40367e+06	1.42368e+06	801634	1.032e+06	3.27541e+06	5.26491e+06	181728	4.51488e+06	5.19657e+06	2.8838e+06	6.24315e+06	6.72071e+06	1.15103e+06	614751	780123	1.013e+06	1.03599e+06	771038	649270	259955	1.07832e+06	767078	1.26571e+06	1.15862e+06	899353	72049.6	361266	252453	3.10895e+06	1.84427e+06	3.41473e+06	3.87882e+06	6.32898e+06	3.99497e+06	1.22367e+07	3.9264e+06	3.20742e+06	1.41345e+06	3.13137e+06
102	(2R,3R,4S,5S,6R)-2-{[(2E,6R)-6-hydroxy-2,6-dimethylocta-2,7-dien-1-yl]oxy}-6-(hydroxymethyl)oxane-3,4,5-triol	C16 H28 O7	355.172	2.579	97.9	Organic acids	DDA for preferred ion	203.05	Positive	[M+H]+1	452307	816535	832854	533478	3.76705e+06	4.11293e+06	4.30962e+06	3.85754e+06	1.97342e+06	1.9266e+06	191888	1.87858e+06	1.54047e+06	1.4543e+06	1.32107e+06	1.65887e+06	1.71774e+06	1.72518e+06	1.76933e+06	1.88507e+06	1.1935e+06	1.24195e+06	676793	1.35129e+06	1.8154e+06	2.35605e+06	1.68301e+06	1.75937e+06	1.2745e+06	2.53032e+06	2.5802e+06	1.48081e+06	1.94759e+06	2.11467e+06	2.42418e+06	2.29993e+06	1.58732e+06	1.02121e+06	1.44632e+06
103	(2S,3S,4S,5R,6S)-6-{[5,7-dihydroxy-2-(4-hydroxyphenyl)-4-oxo-4H-chromen-3-yl]oxy}-3,4,5-trihydroxyoxane-2-carboxylic acid	C21 H18 O12	463.087	4.044	97.2	Polyphenols	DDA for preferred ion	301.07	Positive	[M+H]+1	3.08884e+07	3.24804e+07	3.5293e+07	3.15318e+07	1.5533e+07	1.52872e+07	2.16156e+07	1.46603e+07	2.01518e+07	1.88668e+07	2.14173e+07	1.91169e+07	3.48458e+07	3.69803e+07	3.68877e+07	3.16045e+07	2.4903e+07	2.12711e+07	2.05964e+07	2.57614e+07	2.66705e+07	2.77921e+07	3.56278e+07	2.98789e+07	1.4569e+07	2.87986e+07	1.54161e+07	1.80194e+07	2.70927e+07	2.53653e+07	2.14015e+07	2.40489e+07	5.28498e+07	5.65978e+07	6.7077e+07	5.75198e+07	5.33146e+07	6.09903e+07	5.49379e+07
104	10-Propoxydecanoic acid	C13 H26 O3	237.207	2.035	96.4	Other endogenous metabolites	DDA for preferred ion	149.09	Positive	[M+H]+1	614203	697599	675650	514769	53291.3	52293.5	49219.3	50925	217493	97392.2	147340	165329	5.73062e+06	3.00147e+06	4.00564e+06	3.56373e+06	40343.7	38233	34660.6	41465.8	7.64969e+06	6.09222e+06	1.49045e+07	9.6728e+06	807050	668113	835448	593338	105800	112365	79787	134479	66681.4	41187.3	76378.7	40089.5	711484	440654	539360
105	2-Aminoadipic acid	C6 H11 N O4	162.076	9.406	98.1	Amino acids and related derivatives	DDA for preferred ion	98.06	Positive	[M+H]+1	6.55423e+07	2.9602e+07	4.81287e+07	3.65534e+07	4.54242e+07	4.84159e+07	7.08683e+07	5.0773e+07	7.69548e+07	8.70352e+07	9.03988e+07	7.79284e+07	1.4056e+08	1.0895e+08	1.54078e+08	1.34497e+08	8.51183e+07	7.32105e+07	3.41127e+07	4.342e+07	1.26087e+08	1.16426e+08	1.3153e+08	1.11967e+08	5.10244e+07	4.8694e+07	5.4892e+07	6.31358e+07	9.26898e+07	5.8773e+07	5.22518e+07	4.59462e+07	6.72604e+07	7.59691e+07	8.51211e+07	7.22447e+07	8.03005e+07	6.32375e+07	7.343e+07
106	4-Aminobiphenyl	C12 H11 N	170.096	1.251	96.9	Exogenous substances	DDA for preferred ion	92.05	Positive	[M+H]+1	1.82216e+06	1.98844e+06	1.54122e+06	1.64184e+06	86746.6	98436.2	74621.9	87469.3	89289	66349.6	88866.3	87382.7	101109	81602.2	92146.9	78114.9	87328.6	68900.8	70355.8	86249.3	1.6381e+07	1.21834e+07	2.14969e+07	1.71966e+07	104365	96015.4	116121	76057.1	437523	625755	439197	547819	98623.6	67700.3	132480	74082.2	111104	82578.8	107185
107	Acetylarginine	C8 H16 N4 O3	217.129	8.498	98.5	Amino acids and related derivatives	DDA for preferred ion	158.08	Positive	[M+H]+1	770590	1.21155e+06	976179	1.26741e+06	1.36947e+06	1.3995e+06	1.09109e+06	1.20699e+06	1.26851e+06	779813	1.1716e+06	1.11906e+06	903758	615110	646162	608910	306625	220564	722877	440152	1.48797e+06	813871	1.61922e+06	1.19528e+06	529118	55760.6	712482	439044	5.06607e+06	5.34863e+06	7.66816e+06	7.39834e+06	999469	820608	1.40518e+06	852573	4.31025e+06	3.23621e+06	3.90056e+06
108	S-Adenosylmethionine	C15 H22 N6 O5 S	399.144	15.942	96.2	Amino acids and related derivatives	DDA for preferred ion	250.09	Positive	[M+H]+1	1.83115e+07	2.2411e+07	2.28458e+07	2.20022e+07	8.19132e+06	8.6303e+06	1.13383e+07	7.7618e+06	1.62705e+07	1.53285e+07	1.63432e+07	1.37175e+07	1.63255e+07	1.614e+07	1.89762e+07	1.51304e+07	1.42519e+07	1.22142e+07	1.06329e+07	1.34151e+07	2.55814e+07	2.10157e+07	2.9007e+07	2.45764e+07	8.94365e+06	1.49787e+07	1.40682e+07	1.2927e+07	1.75907e+07	1.92165e+07	1.56545e+07	1.61801e+07	1.235e+07	1.37718e+07	1.50373e+07	1.47739e+07	1.11957e+07	1.38502e+07	8.8907e+06
109	Hexadecanamide	C16 H33 N O	256.263	1.244	98.2	Other endogenous metabolites	DDA for preferred ion	151.11	Positive	[M+H]+1	3.49461e+06	5.34654e+06	4.35066e+06	5.46873e+06	6.13839e+06	7.95924e+06	5.00689e+06	5.56188e+06	5.58473e+06	3.77314e+06	5.25693e+06	6.9838e+06	4.91691e+06	5.00665e+06	6.82399e+06	4.27294e+06	5.86021e+06	4.08671e+06	3.43745e+06	6.30303e+06	4.29083e+06	3.9907e+06	5.79259e+06	5.28285e+06	4.75998e+06	7.14568e+06	6.35014e+06	3.80446e+06	5.29386e+06	6.95671e+06	5.90599e+06	6.00082e+06	7.13791e+06	4.37265e+06	1.04464e+07	5.88337e+06	6.0229e+06	3.78245e+06	5.82894e+06
110	cyanidin 3-glucoside	C21 H20 O11	449.108	3.804	96.9	Polyphenols	DDA for preferred ion	287.05	Positive	[M+H]+1	1.18746e+06	1.23899e+06	542461	505702	9.46459e+06	8.71633e+06	3.55171e+06	7.38474e+06	1.79491e+07	1.20157e+07	1.8819e+07	1.90021e+07	2.76089e+07	1.9251e+07	2.38094e+07	2.05977e+07	7.35967e+06	5.87568e+06	7.80119e+06	3.48873e+06	1.49155e+07	1.4648e+07	1.82574e+07	1.57939e+07	5.26447e+07	3.13561e+07	4.85473e+07	3.42148e+07	2.52528e+07	1.90119e+07	2.66613e+07	2.8694e+07	1.58716e+07	1.05452e+07	2.05136e+07	1.03937e+07	2.31086e+07	1.42291e+07	2.66349e+07
111	peonidin 3-glucoside	C22 H22 O11	463.123	5.279	96.7	Polyphenols	DDA for preferred ion	301.07	Positive	[M+H]+1	1.7944e+06	3.49696e+06	1.57583e+06	364853	8.89715e+06	8.85796e+06	4.99003e+06	7.91921e+06	5.67934e+06	4.35279e+06	6.69356e+06	6.13634e+06	1.34477e+07	2.70871e+07	3.15993e+07	2.63881e+07	4.76955e+06	2.24635e+06	4.3004e+06	3.51288e+06	5.69043e+07	4.47081e+07	7.61259e+07	5.62543e+07	1.40212e+08	6.24072e+07	1.09952e+08	9.6976e+07	3.72994e+07	3.48734e+07	4.81011e+07	5.28427e+07	3.26581e+07	2.63086e+07	5.20906e+07	2.92257e+07	7.95611e+07	5.28751e+07	7.34094e+07
112	γ-Aminobutyric acid (GABA)	C4 H9 N O2	104.071	6.677	98.4	Amino acids and related derivatives	DDA for preferred ion	87.04	Positive	[M+H]+1	160990	3.79252e+09	2.31304e+09	2.43822e+09	4.73476e+09	4.47263e+09	1.51977e+09	4.49523e+09	4.52185e+09	2.71781e+09	4.25484e+09	4.27479e+09	3.84411e+09	2.37455e+09	2.62493e+09	2.49301e+09	3.3582e+09	3.23682e+09	4.24521e+09	2.14407e+09	4.09374e+09	2.8484e+09	3.98277e+09	4.45838e+09	1.84329e+09	1.16282e+08	1.67296e+09	9.49223e+08	9.06891e+08	8.67509e+08	1.58852e+09	1.48064e+09	3.86219e+09	2.54514e+09	4.10204e+09	2.56625e+09	1.9132e+09	1.1086e+09	1.91983e+09
113	Nipecotic acid	C6 H11 N O2	130.086	7.839	99.5	Other endogenous metabolites	DDA for preferred ion	84.08	Positive	[M+H]+1	1.59879e+09	2.31733e+09	1.63441e+09	2.3964e+09	6.37893e+09	7.26313e+09	4.71728e+09	6.97028e+09	4.26118e+09	3.01996e+09	4.69972e+09	4.32431e+09	3.78664e+09	2.43012e+09	2.77231e+09	2.2955e+09	1.80458e+09	1.45024e+09	2.18657e+09	1.44224e+09	1.17014e+10	7.77925e+09	1.39758e+10	1.32701e+10	2.70295e+09	1.77551e+09	2.79929e+09	2.00651e+09	2.64596e+09	2.61797e+09	3.81419e+09	3.9402e+09	6.73783e+09	5.16699e+09	7.7587e+09	5.33747e+09	7.0489e+09	5.66084e+09	6.76537e+09
Number	Compound Name	Formula	m/z	Retention Time (min)	Score in mzCloud	Class	MS2		Mode	Reference Ion	Area: BY_1	Area: BY_2	Area: BY_3	Area: BY_4	Area: FY_1	Area: FY_2	Area: FY_3	Area: FY_4	Area: GD_1	Area: GD_2	Area: GD_3	Area: GD_4	Area: HY1_1	Area: HY1_2	Area: HY1_3	Area: HY1_4	Area: HY2_1	Area: HY2_2	Area: HY2_3	Area: HY2_4	Area: HY3_1	Area: HY3_2	Area: HY3_3	Area: HY3_4	Area: SDH_1	Area: SDH_2	Area: SDH_3	Area: SDH_4	Area: SZ_1	Area: SZ_2	Area: SZ_3	Area: SZ_4	Area: TZGZ_1	Area: TZGZ_2	Area: TZGZ_3	Area: TZGZ_4	Area: YX_1	Area: YX_2	Area: YX_3
1	2,2'-Methylenebis(4-methyl-6-tert-butylphenol)	C23 H32 O2	339.24	1.228	93.7	Polyphenols	DDA for preferred ion	163.11	Negative	[M-H]-1	8.13914e+08	8.12968e+08	8.69932e+08	1.21483e+09	9.45097e+08	1.08952e+09	6.59319e+08	8.6103e+08	7.47054e+08	6.4185e+08	6.58745e+08	8.06236e+08	7.43745e+08	8.85114e+08	1.32245e+09	1.02751e+09	1.08748e+09	8.99397e+08	7.57715e+08	8.03606e+08	6.402e+08	7.38893e+08	6.929e+08	6.43464e+08	6.45516e+08	9.69991e+08	7.57902e+08	5.76519e+08	8.3633e+08	1.18751e+09	7.67823e+08	8.12861e+08	1.00528e+09	5.96251e+08	1.41324e+09	8.25775e+08	6.78588e+08	4.73111e+08	6.87221e+08
2	Catechin	C15 H14 O6	289.079	2.033	90.5	Polyphenols	DDA for preferred ion	245.08	Negative	[M-H]-1	2.50673e+08	2.31262e+08	2.42705e+08	2.50042e+08	7.55394e+08	7.81652e+08	6.95443e+08	7.56824e+08	6.66107e+08	5.93693e+08	6.92889e+08	6.31437e+08	2.413e+08	2.13282e+08	3.01073e+08	3.40347e+08	3.04431e+08	2.80937e+08	2.59567e+08	2.19136e+08	2.08259e+08	2.23563e+08	2.06869e+08	2.0566e+08	4.12016e+08	4.40781e+08	4.38312e+08	4.2218e+08	5.31422e+08	5.55756e+08	5.66363e+08	5.47719e+08	3.24097e+08	3.20331e+08	4.08324e+08	3.44943e+08	4.69326e+08	4.3987e+08	4.42224e+08
3	N-Acetyl-DL-glutamic acid	C7 H11 N O5	188.063	2.899	86.1	Amino acids and related derivatives	DDA for preferred ion	128.03	Negative	[M-H]-1	2.01152e+07	2.04975e+07	2.01384e+07	2.16882e+07	1.90746e+07	2.02162e+07	1.75026e+07	2.07846e+07	6.58464e+06	5.48733e+06	7.0882e+06	6.05211e+06	1.23972e+07	1.08237e+07	1.14887e+07	1.24699e+07	1.00598e+07	9.0289e+06	9.35184e+06	7.73733e+06	1.0333e+07	9.73973e+06	9.55589e+06	1.09474e+07	4.87706e+06	4.63601e+06	4.94155e+06	4.51037e+06	2.59715e+07	2.89554e+07	2.89592e+07	2.97306e+07	8.8085e+06	6.46625e+06	9.00306e+06	7.18637e+06	1.43623e+07	1.2263e+07	1.51005e+07
4	Citric acid	C6 H8 O7	191.026	8.025	85.8	Organic acids	DDA for preferred ion	111.01	Negative	[M-H]-1	1.44914e+10	1.7152e+10	2.80175e+10	1.70334e+10	1.44025e+10	1.59008e+10	1.8679e+10	1.64335e+10	2.02172e+10	2.07703e+10	3.56217e+10	2.68466e+10	2.38439e+10	3.52849e+10	2.64617e+10	3.39159e+10	3.90524e+10	1.95939e+10	2.1987e+10	1.66672e+10	3.78798e+10	2.9746e+10	2.07546e+10	1.78283e+10	1.84402e+10	2.08317e+10	1.7327e+10	1.81707e+10	1.93151e+10	2.2383e+10	2.74026e+10	1.63052e+10	2.27066e+10	1.65075e+10	3.41213e+10	1.86166e+10	3.42519e+10	4.47144e+09	1.89354e+10
5	2-Isopropylmalic acid	C7 H12 O5	175.067	1.846	85.4	Organic acids	DDA for preferred ion	115.04	Negative	[M-H]-1	1.14221e+07	4.41372e+06	4.85957e+06	1.70895e+07	5.46606e+06	6.73526e+06	6.24231e+07	2.19538e+06	9.53558e+06	7.56272e+06	7.59865e+06	1.36592e+07	2.81138e+06	4.05166e+06	3.63759e+06	3.63591e+06	2.3038e+06	2.90521e+06	2.3728e+06	931608	9.4152e+06	1.12419e+07	3.35442e+06	5.27891e+06	8.25198e+06	2.21941e+06	2.3841e+06	1.54972e+06	8.39899e+06	2.90028e+07	1.96047e+07	1.46188e+07	2.58703e+06	4.11174e+07	4.16399e+06	860919	2.62318e+07	1.40018e+07	1.75966e+07
6	D-Saccharic acid	C6 H10 O8	209.036	12.758	84.9	Organic acids	DDA for preferred ion	85.03	Negative	[M-H]-1	5.56896e+09	5.43846e+09	5.2149e+09	5.83732e+09	9.1118e+09	9.20732e+09	6.943e+09	8.44254e+09	8.85719e+09	9.18279e+09	1.03973e+10	1.07125e+10	8.67229e+09	8.48342e+09	9.33334e+09	1.00565e+10	8.59259e+09	8.13782e+09	6.73888e+09	5.68851e+09	7.82599e+09	9.17778e+09	7.29114e+09	7.29739e+09	9.2724e+09	7.12634e+09	7.32689e+09	8.25572e+09	9.79305e+09	9.51474e+09	9.24298e+09	9.5993e+09	8.53431e+09	7.91877e+09	1.03031e+10	6.76175e+09	7.43177e+09	6.06369e+09	7.57196e+09
7	L-Glutathione (reduced)	C10 H17 N3 O6 S	306.083	12.772	84.2	Amino acids and related derivatives	DDA for preferred ion	143.04	Negative	[M-H]-1	2.69966e+06	5.71879e+06	1.1174e+08	5.00085e+07	3.3334e+06	7.62083e+07	4.58281e+07	3.48028e+07	7.78679e+07	6.29608e+07	4.82048e+07	4.42916e+07	6.79767e+06	4.09679e+06	4.5798e+07	1.69077e+07	4.37076e+07	3.69624e+07	2.65495e+06	4.13643e+06	7.47473e+06	3.41935e+07	9.48144e+06	1.00666e+07	5.78288e+06	5.38877e+07	2.8882e+07	4.87379e+07	8.38332e+07	4.34571e+07	1.17135e+07	7.98873e+07	7.3634e+07	5.01075e+07	9.88715e+07	8.34563e+07	4.7195e+06	632003	7.49033e+06
8	α-D-Mannose 1-phosphate	C6 H13 O9 P	259.029	16.689	84	Other endogenous metabolites	DDA for preferred ion	96.97	Negative	[M-H]-1	7.85961e+07	6.59182e+07	6.84218e+07	1.14348e+08	8.55034e+07	7.19091e+07	5.7601e+07	7.17e+07	1.12555e+08	8.30762e+07	1.05512e+08	1.04836e+08	1.20639e+08	1.0641e+08	1.10028e+08	1.38027e+08	8.73817e+07	8.41611e+07	6.42705e+07	4.04826e+07	8.59366e+07	6.22532e+07	4.72644e+07	9.18912e+07	7.57666e+07	8.35636e+07	8.71853e+07	1.08684e+08	9.30558e+07	1.05832e+08	6.7645e+07	7.19119e+07	7.89934e+07	9.05672e+07	1.33806e+08	9.76908e+07	8.46679e+07	5.22934e+07	5.6774e+07
9	Glutamic acid	C5 H9 N O4	146.052	11.729	81.9	Amino acids and related derivatives	DDA for preferred ion	102.05	Negative	[M-H]-1	4.32833e+08	4.17303e+08	4.3291e+08	4.77483e+08	4.48072e+08	4.50885e+08	3.61721e+08	4.54455e+08	4.3929e+08	3.87155e+08	4.68629e+08	3.39867e+08	5.14661e+08	4.68816e+08	5.50649e+08	5.65596e+08	2.97399e+08	2.7932e+08	2.50548e+08	1.84771e+08	3.10349e+08	3.21745e+08	2.85493e+08	2.84723e+08	4.43444e+08	4.24693e+08	4.54659e+08	4.62205e+08	7.68867e+08	7.8038e+08	8.10615e+08	7.89557e+08	2.74222e+08	2.53234e+08	3.57625e+08	2.58276e+08	3.73126e+08	3.01182e+08	3.4903e+08
10	Ascorbic acid	C6 H8 O6	175.031	3.758	81.8	Vitamins	DDA for preferred ion	115	Negative	[M-H]-1	9.66229e+09	8.5858e+09	8.90783e+09	9.7526e+09	1.01129e+10	9.43102e+09	7.2016e+09	1.01642e+10	1.27372e+10	1.10514e+10	1.36942e+10	1.34046e+10	1.19124e+10	1.06799e+10	1.33741e+10	1.37051e+10	8.78288e+09	9.01434e+09	7.64283e+09	5.84306e+09	9.81916e+09	1.07978e+10	9.55106e+09	9.64891e+09	9.38659e+09	8.22021e+09	9.47455e+09	8.74137e+09	1.18349e+10	1.26726e+10	1.27813e+10	1.31169e+10	7.75082e+09	6.81301e+09	1.00891e+10	6.77883e+09	8.28823e+09	6.67187e+09	7.91504e+09
11	D-(-)-Glutamine	C5 H10 N2 O3	145.069	12.418	80.8	Amino acids and related derivatives	DDA for preferred ion	127.05	Negative	[M-H]-1	1.18385e+09	1.25883e+09	1.31098e+09	1.25379e+09	3.0907e+09	2.89209e+09	2.48769e+09	2.66338e+09	3.68429e+09	3.25886e+09	3.60609e+09	3.51176e+09	3.94585e+09	3.44234e+09	4.27548e+09	4.27009e+09	1.81298e+09	1.54249e+09	1.46057e+09	1.27951e+09	5.25711e+09	5.10298e+09	4.99758e+09	5.32967e+09	4.6786e+09	4.4818e+09	4.88417e+09	4.88798e+09	3.86286e+09	3.87178e+09	3.82072e+09	3.71473e+09	3.78246e+09	3.77598e+09	5.03214e+09	3.75575e+09	2.90758e+09	2.51078e+09	2.76944e+09
12	D-Raffinose	C18 H32 O16	503.169	15.215	79.9	Other endogenous metabolites	DDA for preferred ion	89.02	Negative	[M-H]-1	1.45305e+06	795601	810595	802315	8.1573e+06	5.06362e+06	7.61166e+06	7.42964e+06	6.40716e+06	6.29393e+06	7.52709e+06	6.64144e+06	4.19201e+06	3.61472e+06	4.8605e+06	4.80355e+06	610818	416365	1.18471e+06	785641	919225	853299	686187	861023	7.45495e+06	8.11452e+06	8.57881e+06	8.32364e+06	706075	1.20587e+06	799857	1.59667e+06	8.74159e+06	8.61431e+06	1.09727e+07	1.00523e+07	4.67777e+06	5.30727e+06	4.62756e+06
13	DL-Tryptophan	C11 H12 N2 O2	203.089	6.982	79.8	Amino acids and related derivatives	DDA for preferred ion	116.05	Negative	[M-H]-1	6.66761e+06	5.24085e+06	7.0441e+06	7.64542e+06	7.39235e+06	9.2715e+06	6.35498e+06	8.2519e+06	1.1802e+07	7.8182e+06	1.25231e+07	1.33749e+07	1.1001e+07	9.68074e+06	1.26083e+07	1.57249e+07	6.77062e+06	4.48e+06	4.35538e+06	2.25137e+06	2.14032e+07	1.91114e+07	2.15615e+07	2.55053e+07	7.16881e+06	8.38587e+06	8.40551e+06	8.16132e+06	1.16834e+07	1.28666e+07	1.26558e+07	1.03133e+07	2.42604e+06	2.38654e+06	5.8614e+06	2.74013e+06	6.41375e+06	5.21511e+06	5.14428e+06
14	Dodecyl sulfate	C12 H26 O4 S	265.155	1.186	78.9	Other endogenous metabolites	DDA for preferred ion	96.96	Negative	[M-H]-1	1.70392e+06	1.13771e+06	980792	1.00544e+06	1.57956e+06	1.18016e+06	796119	874891	805046	1.15021e+06	794661	727242	986967	1.02017e+06	589475	711679	1.5611e+06	1.38468e+06	776102	1.45043e+06	3.18615e+06	2.74326e+06	3.13037e+06	3.22585e+06	856365	677625	548199	515558	6.70779e+06	7.97147e+06	6.46995e+06	6.82829e+06	1.08994e+06	1.35802e+06	1.22952e+06	878261	1.33229e+06	1.38614e+06	2.28647e+06
15	4-Dodecylbenzenesulfonic acid	C18 H30 O3 S	325.191	1.229	77.6	Exogenous substances	DDA for preferred ion	149.1	Negative	[M-H]-1	7.82124e+06	2.35168e+07	6.02869e+06	7.01425e+06	2.56954e+06	2.57675e+06	2.27207e+06	1.7294e+06	4.3456e+06	3.75559e+06	3.22582e+06	2.60146e+06	4.70352e+06	4.69232e+06	4.91273e+06	4.13709e+06	3.56569e+06	2.7289e+06	2.38266e+06	1.92637e+06	5.58388e+06	5.16339e+06	6.16144e+06	5.42331e+06	4.25407e+06	3.45843e+06	2.6911e+06	3.3127e+06	6.05656e+06	6.42198e+06	5.65483e+06	6.66229e+06	4.96986e+06	3.24008e+06	4.46429e+06	2.84339e+06	5.92864e+06	5.21619e+06	5.85394e+06
16	Thymidine	C10 H14 N2 O5	241.09	2.438	77	Other endogenous metabolites	DDA for preferred ion	151.05	Negative	[M-H]-1	173919	169570	170052	175246	1.49444e+06	1.20297e+06	1.03257e+06	1.05644e+06	507740	538021	542974	496249	4.95873e+06	4.03882e+06	4.80889e+06	5.12535e+06	4.97533e+07	4.57068e+07	4.23712e+07	3.78319e+07	8.1042e+06	9.07087e+06	8.60344e+06	7.66373e+06	219101	318062	369733	317491	169094	178252	174206	175419	2.63035e+06	2.66281e+06	3.5442e+06	2.71453e+06	449586	405595	333031
17	(±)-Abscisic acid	C15 H20 O4	263.136	1.408	75.5	Other endogenous metabolites	DDA for preferred ion	219.14	Negative	[M-H]-1	1.04968e+07	1.01569e+07	1.07767e+07	1.15637e+07	3.12893e+07	3.20425e+07	2.80276e+07	3.0766e+07	1.17798e+07	9.32993e+06	1.14296e+07	1.13808e+07	1.83192e+07	1.6171e+07	1.92058e+07	2.0062e+07	2.43966e+07	2.13491e+07	1.93425e+07	1.60137e+07	2.55052e+07	2.36504e+07	2.09311e+07	2.28244e+07	2.84669e+07	2.83018e+07	2.91707e+07	3.14175e+07	3.34491e+07	3.24716e+07	3.61719e+07	3.42685e+07	2.27428e+07	2.28965e+07	3.18598e+07	2.20769e+07	3.0664e+07	2.73358e+07	2.87936e+07
18	Pantothenic acid	C9 H17 N O5	218.11	2.104	73.9	Vitamins	DDA for preferred ion	88.04	Negative	[M-H]-1	1.91422e+07	1.91958e+07	1.87303e+07	2.0984e+07	2.25081e+07	2.46954e+07	1.98704e+07	2.17374e+07	3.71065e+07	3.25249e+07	3.98222e+07	3.8644e+07	2.52514e+07	2.33184e+07	2.84134e+07	2.71507e+07	2.4861e+07	2.14867e+07	1.96627e+07	1.56762e+07	2.78806e+07	3.08864e+07	2.77325e+07	2.64667e+07	1.92529e+07	1.84124e+07	1.96226e+07	2.14244e+07	2.2057e+07	2.18469e+07	2.25153e+07	2.00339e+07	2.75352e+07	2.54405e+07	3.08779e+07	2.70281e+07	4.34357e+07	3.74481e+07	3.81611e+07
19	3-Hydroxy-3-methylglutaric acid	C6 H10 O5	161.052	2.088	73.8	Organic acids	DDA for preferred ion	99.04	Negative	[M-H]-1	3.78285e+07	3.70208e+07	3.62943e+07	4.09659e+07	6.44484e+07	6.45433e+07	4.93929e+07	6.22085e+07	1.20467e+08	1.02256e+08	1.22839e+08	1.23135e+08	3.86827e+07	3.27323e+07	4.07262e+07	4.07069e+07	4.25129e+07	3.91848e+07	3.50903e+07	2.87532e+07	4.71519e+07	4.66986e+07	4.31772e+07	4.72625e+07	7.92727e+07	6.81378e+07	7.49247e+07	7.94359e+07	7.94979e+07	7.64412e+07	8.57151e+07	8.11545e+07	1.83666e+07	1.69474e+07	2.95441e+07	1.98446e+07	9.02287e+07	7.79364e+07	8.63104e+07
20	L-(-)-Malic acid	C4 H6 O5	133.02	3.059	73.5	Organic acids	DDA for preferred ion	133.01	Negative	[M-H]-1	1.57458e+08	4.30536e+08	4.15369e+09	3.38032e+09	5.01043e+09	5.21763e+09	4.05913e+09	4.74939e+09	6.41999e+09	1.86462e+08	3.77671e+09	2.18335e+08	4.71541e+09	9.58269e+09	7.56495e+09	5.83835e+09	5.00452e+09	7.54096e+07	3.27424e+08	3.74667e+09	3.81704e+09	2.63407e+09	4.70254e+09	3.96665e+09	3.79839e+09	7.66362e+09	3.11539e+08	4.74441e+09	1.8146e+08	4.32798e+09	3.037e+09	4.92899e+08	8.20794e+06	1.91573e+08	3.3723e+09	1.49557e+08	2.30969e+08	5.15802e+08	5.50566e+09
21	Histidine	C6 H9 N3 O2	154.068	15.776	73.4	Amino acids and related derivatives	DDA for preferred ion	137.03	Negative	[M-H]-1	3.25245e+06	3.08085e+06	3.068e+06	3.52492e+06	1.17054e+07	1.35984e+07	9.08298e+06	7.85485e+06	4.13902e+07	2.77098e+07	3.79803e+07	4.51201e+07	2.82553e+07	2.49291e+07	2.83858e+07	1.93853e+07	5.39054e+06	5.45358e+06	5.47602e+06	4.12786e+06	1.98995e+07	2.017e+07	1.89863e+07	2.3162e+07	6.71197e+07	3.25763e+07	4.03492e+07	5.31285e+07	8.96267e+06	7.58334e+06	1.10501e+07	8.5936e+06	2.75493e+07	2.29888e+07	4.51517e+07	3.48486e+07	1.138e+07	7.48097e+06	7.63262e+06
22	Apigenin	C15 H10 O5	269.055	2.759	72.9	Polyphenols	DDA for preferred ion	100.96	Negative	[M-H]-1	678432	596678	622251	598535	730119	625417	493153	588532	1.90307e+06	1.77244e+06	2.35363e+06	1.73533e+06	5.5209e+06	5.24797e+06	6.57449e+06	6.46569e+06	6.56961e+06	5.33186e+06	4.87485e+06	5.21453e+06	6.47557e+06	7.00474e+06	6.7058e+06	6.32898e+06	1.93042e+06	2.67492e+06	1.96742e+06	2.20669e+06	2.85755e+06	2.6629e+06	2.50706e+06	2.36353e+06	862364	1.18039e+06	829621	1.08988e+06	6.78897e+06	5.17597e+06	5.58798e+06
23	trans-Aconitic acid	C6 H6 O6	173.015	7.148	72.8	Organic acids	DDA for preferred ion	85.03	Negative	[M-H]-1	1.87263e+08	1.48454e+08	2.41952e+08	1.79914e+08	1.22896e+08	1.12961e+08	1.29093e+08	8.80187e+07	2.00493e+08	1.89642e+08	1.45658e+08	1.71463e+08	1.68395e+08	1.44605e+08	1.5069e+08	1.36615e+08	1.76446e+08	2.21221e+08	2.43752e+08	1.2906e+08	1.86111e+08	1.39011e+08	1.41644e+08	1.31168e+08	9.75418e+07	6.14639e+07	6.19734e+07	7.94058e+07	1.79701e+08	2.07295e+08	1.50651e+08	1.8486e+08	1.51489e+08	1.42769e+08	1.46054e+08	1.614e+08	2.46382e+08	1.37018e+08	2.50552e+08
24	2-Hydroxycaproic acid	C6 H12 O3	131.077	1.481	72.2	Organic acids	DDA for preferred ion	85.06	Negative	[M-H]-1	7.85102e+07	7.64025e+07	7.4848e+07	8.35336e+07	8.5508e+07	9.74867e+07	6.86164e+07	8.70165e+07	6.99156e+07	6.13897e+07	7.29928e+07	7.19783e+07	6.75077e+07	6.42309e+07	7.64177e+07	7.81637e+07	6.89776e+07	5.81003e+07	5.32815e+07	3.63318e+07	1.65866e+08	1.67817e+08	1.49588e+08	1.61088e+08	4.52257e+07	3.92441e+07	4.22202e+07	4.26973e+07	2.01089e+08	2.03095e+08	2.13761e+08	2.19618e+08	2.31134e+07	2.02292e+07	3.38379e+07	2.01774e+07	6.52858e+07	5.28281e+07	6.39589e+07
25	Cytidine	C9 H13 N3 O5	242.087	13.164	71.8	Other endogenous metabolites	DDA for preferred ion	168.04	Negative	[M-H]-1	2.98987e+07	2.82425e+07	3.02435e+07	3.31005e+07	4.13688e+07	4.05902e+07	3.86613e+07	3.44416e+07	1.00875e+08	8.49752e+07	1.04188e+08	9.72369e+07	1.64166e+07	1.59476e+07	1.81714e+07	1.99275e+07	1.79863e+07	1.60717e+07	1.5691e+07	1.30105e+07	2.14296e+07	2.11588e+07	1.96966e+07	1.83261e+07	1.27599e+07	1.37868e+07	1.39982e+07	1.39597e+07	2.27497e+07	2.21564e+07	2.24688e+07	2.22077e+07	5.61326e+07	5.59177e+07	7.49316e+07	5.68359e+07	1.57941e+07	1.4744e+07	1.47462e+07
26	Fludioxonil	C12 H6 F2 N2 O2	247.039	1.272	71.6	Exogenous substances	DDA for preferred ion	226.99	Negative	[M-H]-1	94223.2	102617	79396.9	109804	90049.8	99286	66507	91126.2	3.64031e+07	2.9319e+07	3.19578e+07	4.45528e+07	1.08059e+07	1.07577e+07	1.19116e+07	1.66096e+07	104839	104375	1.6103e+06	390947	86352.4	83703.8	76051.6	65883.4	2.77861e+07	1.87859e+07	1.6089e+07	2.69704e+07	90120.9	99495.2	92855.4	92912.1	2.08423e+07	3.59515e+07	2.95846e+07	1.67994e+07	3.48972e+07	2.17044e+07	2.8688e+07
27	Taurine	C2 H7 N O3 S	124.013	2.793	71.4	Amino acids and related derivatives	DDA for preferred ion	79.96	Negative	[M-H]-1	4.17013e+07	3.95691e+07	3.87379e+07	4.50778e+07	2.0359e+06	1.78365e+06	1.51407e+06	1.84335e+06	4.2203e+06	3.27577e+06	4.25481e+06	3.73236e+06	1.07581e+08	9.67207e+07	1.15253e+08	1.1671e+08	3.01684e+06	3.09053e+06	2.37469e+06	1.89332e+06	9.87096e+07	1.02009e+08	8.8791e+07	9.95115e+07	2.23269e+07	2.27943e+07	2.54078e+07	2.48708e+07	2.83838e+07	2.79982e+07	3.08087e+07	2.78261e+07	1.59627e+06	1.4722e+06	2.11015e+06	1.41802e+06	8.04176e+06	6.70425e+06	7.54075e+06
28	Mevalonic acid	C6 H12 O4	147.072	1.971	68.7	Organic acids	DDA for preferred ion	72.99	Negative	[M-H]-1	1.42993e+08	8.05753e+07	1.34801e+08	1.46319e+08	6.60241e+07	6.80445e+07	5.06211e+07	7.20103e+07	7.28361e+07	6.33055e+07	7.98947e+07	7.66856e+07	4.06026e+07	4.18032e+07	5.06319e+07	5.31037e+07	4.73358e+07	4.28701e+07	4.7388e+07	2.67222e+07	7.90827e+07	8.46331e+07	8.0118e+07	8.00303e+07	5.07985e+07	4.60399e+07	4.90564e+07	5.08321e+07	1.48311e+08	1.51031e+08	1.60947e+08	1.67785e+08	1.89976e+07	1.90027e+07	2.66523e+07	1.80892e+07	5.74438e+07	4.26708e+07	4.59112e+07
29	Phenylalanine	C9 H11 N O2	164.078	6.743	67.5	Amino acids and related derivatives	DDA for preferred ion	147.04	Negative	[M-H]-1	1.09023e+06	819800	539124	787945	4.38908e+06	3.88717e+06	3.45292e+06	3.71941e+06	2.49194e+07	2.72983e+07	2.28471e+07	2.47132e+07	9.79438e+06	7.46591e+06	7.09489e+06	8.68913e+06	796146	799335	804247	487024	5.6101e+06	5.26081e+06	4.80748e+06	5.90209e+06	5.57949e+07	3.95642e+07	4.97573e+07	4.91865e+07	6.10277e+06	5.40422e+06	6.40527e+06	6.44212e+06	9.70416e+06	9.44053e+06	1.45267e+07	1.147e+07	7.98394e+06	7.31178e+06	8.10369e+06
30	D-(-)-Quinic acid	C7 H12 O6	191.062	7.179	65.4	Organic acids	DDA for preferred ion	111	Negative	[M-H]-1	8.98971e+07	1.00765e+08	6.38301e+07	9.79665e+07	6.29965e+07	6.51987e+07	1.8381e+08	8.66613e+07	1.90202e+08	1.1586e+08	1.17814e+08	1.17515e+08	6.31734e+07	8.97312e+07	8.31439e+07	8.6767e+07	1.17132e+08	8.76104e+07	1.0633e+08	1.02418e+08	3.17793e+08	1.86426e+08	1.30722e+08	1.00221e+08	5.80434e+07	1.75352e+08	7.51208e+07	8.88472e+07	7.74017e+07	7.40613e+07	1.26007e+08	1.13754e+08	2.99805e+08	2.54949e+08	3.26252e+08	2.55284e+08	9.26685e+07	1.45529e+08	9.55583e+07
31	L-Aspartic acid	C4 H7 N O4	132.036	12.747	64.3	Amino acids and related derivatives	DDA for preferred ion	114.02	Negative	[M-H]-1	3.74688e+08	3.18765e+08	2.75753e+08	3.58441e+08	7.72937e+08	7.61063e+08	6.4029e+08	7.05083e+08	1.09846e+09	9.59197e+08	1.09582e+09	1.00869e+09	8.35327e+08	7.50883e+08	9.13077e+08	9.16101e+08	6.41911e+08	5.81639e+08	4.66638e+08	3.68461e+08	6.91385e+08	6.18186e+08	5.85051e+08	7.2757e+08	9.32885e+08	8.55412e+08	8.88464e+08	9.13191e+08	1.0765e+09	9.6667e+08	1.00935e+09	9.76887e+08	5.50207e+08	5.61122e+08	8.58319e+08	5.34833e+08	4.8222e+08	4.4598e+08	4.8981e+08
32	Asparagine	C4 H8 N2 O3	131.052	12.747	63.7	Organic acids	DDA for preferred ion	114.02	Negative	[M-H]-1	9.85339e+08	9.72648e+08	9.87374e+08	1.08152e+09	2.94449e+09	2.80773e+09	2.66734e+09	2.68425e+09	2.7612e+09	2.65253e+09	3.20835e+09	2.95091e+09	2.35493e+09	2.14647e+09	2.54518e+09	2.4166e+09	2.53161e+09	2.46358e+09	2.34175e+09	1.88467e+09	2.65067e+09	2.43612e+09	2.32422e+09	2.34454e+09	2.39259e+09	2.5292e+09	2.50003e+09	2.54807e+09	2.49377e+09	2.35111e+09	2.48076e+09	2.42972e+09	2.85017e+09	2.74821e+09	3.3233e+09	2.53418e+09	2.26685e+09	2.0395e+09	2.11167e+09
33	Gallic acid	C7 H6 O5	169.02	2.262	63.4	Organic acids	DDA for preferred ion	125.02	Negative	[M-H]-1	2.58548e+06	3.02541e+06	3.04805e+06	2.94087e+06	6.10192e+06	4.95658e+06	5.02028e+06	5.04588e+06	2.45437e+06	2.20855e+06	2.76967e+06	2.06429e+06	1.01764e+06	1.02296e+06	1.12736e+06	1.54725e+06	1.36382e+06	1.53617e+06	1.11319e+06	1.30985e+06	1.31213e+06	1.46005e+06	1.48311e+06	1.99763e+06	6.41411e+06	5.79643e+06	7.07003e+06	6.46957e+06	4.24243e+06	4.47847e+06	4.1759e+06	3.85272e+06	1.87209e+06	1.66041e+06	2.17241e+06	1.53434e+06	1.01102e+06	1.04977e+06	1.02042e+06
34	Salicylic acid	C7 H6 O3	137.03	2.072	62.7	Organic acids	DDA for preferred ion	83.01	Negative	[M-H]-1	2.49045e+06	2.522e+06	2.74079e+06	2.49554e+06	9.7166e+06	9.49186e+06	8.71029e+06	8.58203e+06	6.19508e+06	5.21231e+06	6.56906e+06	5.03149e+06	4.67753e+06	4.11018e+06	4.64988e+06	4.71988e+06	5.48397e+06	4.49756e+06	4.33286e+06	4.7955e+06	3.83617e+06	4.16834e+06	4.71331e+06	3.79296e+06	5.07675e+06	5.84391e+06	5.72525e+06	6.04439e+06	8.09804e+06	7.47066e+06	6.88991e+06	7.50599e+06	5.86365e+06	5.98814e+06	7.18822e+06	7.19055e+06	5.08518e+06	5.09661e+06	4.26588e+06
35	Citraconic acid	C5 H6 O4	129.025	7.15	62.1	Organic acids	DDA for preferred ion	85.03	Negative	[M-H]-1	1.65927e+09	1.51816e+09	1.61796e+09	1.69914e+09	1.05478e+09	5.89417e+08	7.34078e+08	7.71182e+08	1.66344e+09	1.32848e+09	1.63879e+09	1.23592e+09	1.73579e+09	1.67664e+09	1.70939e+09	1.37172e+09	1.531e+09	1.56512e+09	1.84545e+09	1.27099e+09	1.55812e+09	1.51101e+09	1.60345e+09	1.37508e+09	1.04629e+09	7.66353e+08	6.61448e+08	9.4909e+08	1.50374e+09	1.96209e+09	1.73941e+09	1.60424e+09	1.55973e+09	1.39622e+09	1.68761e+09	1.3301e+09	2.072e+09	1.3778e+09	2.02244e+09
36	2-Furoic acid	C5 H4 O3	111.015	7.152	61.5	Organic acids	DDA for preferred ion	67.02	Negative	[M-H]-1	1.58579e+09	1.40203e+09	1.49901e+09	1.59166e+09	1.0089e+09	5.43095e+08	6.85561e+08	7.09033e+08	1.50909e+09	1.24603e+09	1.56145e+09	1.14183e+09	1.60499e+09	1.56208e+09	1.62118e+09	1.27845e+09	1.4314e+09	1.4539e+09	1.7236e+09	1.19493e+09	1.46939e+09	1.43652e+09	1.50071e+09	1.27338e+09	9.87854e+08	7.28236e+08	6.24201e+08	8.83308e+08	1.42127e+09	1.82344e+09	1.66316e+09	1.51554e+09	1.45358e+09	1.31728e+09	1.59291e+09	1.26459e+09	1.95649e+09	1.27016e+09	1.94241e+09
37	O-Acetylserine	C5 H9 N O4	146.052	3.449	61.2	Amino acids and related derivatives	DDA for preferred ion	74.02	Negative	[M-H]-1	8.81425e+06	8.47582e+06	8.21538e+06	9.25504e+06	3.86333e+06	4.059e+06	3.01715e+06	3.8627e+06	2.08391e+06	1.57898e+06	2.11652e+06	2.31189e+06	3.64428e+06	2.97207e+06	4.43259e+06	4.30898e+06	4.14095e+06	3.37765e+06	3.10847e+06	2.13576e+06	5.88222e+06	7.03815e+06	6.69648e+06	5.89202e+06	1.53498e+06	1.64355e+06	1.66687e+06	1.47444e+06	1.12399e+07	9.38269e+06	1.14584e+07	1.1159e+07	2.04411e+06	1.87755e+06	2.74882e+06	1.74704e+06	3.07685e+07	2.44849e+07	2.68336e+07
[truncated: 9 more columns]
