# Supplementary material for: Comparative Metabolomic Analysis of the Nutritional Aspects from Ten Cultivars of the Strawberry Fruit
Source: Foods. 2023 Mar 9;12(6):1153. doi: 10.3390/foods12061153 (PMC10048718; doi:10.3390/foods12061153)
Supplement: Supplementary file 1 [file foods-12-01153-s001.zip › Supplementary Materials 3-Table S2-revised.xlsx]

## Sheet: Sheet1
Number	Name	Std. dev. (BY)	Std. dev. (FY)	Std. dev. (GD)	Std. dev. (HY1)	Std. dev. (HY2)	Std. dev. (HY3)	Std. dev. (SDH)	Std. dev. (SZ)	Std. dev. (TZGZ)	Std. dev. (YX)	Std. dev. (YY)	Std. dev. (ZJ)
1	(2E)-3-(2-{[(2S,3R,4S,5S,6R)-3,4,5-trihydroxy-6-(hydroxymethyl)oxan-2-yl]oxy}phenyl)prop-2-enoic acid	0.0692928	0.0526262	0.0765883	0.105061	0.0438568	0.10576	0.0717837	0.0873208	0.139221	0.177805	0.458364	0.0936878
2	(2R,3S,4S,5R,6R)-5-{[(2S,3R,4R)-3,4-dihydroxy-4-(hydroxymethyl)oxolan-2-yl]oxy}-2-(hydroxymethyl)-6-[2-(4-hydroxyphenyl)ethoxy]oxane-3,4-diol	0.0773377	0.0241778	0.0466005	0.0659121	0.0454383	0.11218	0.0928736	0.079745	0.0757728	0.0911015	0.0466491	0.0574145
3	(2S,3S,4S,5R,6R)-6-[3-(benzoyloxy)-2-hydroxypropoxy]-3,4,5-trihydroxyoxane-2-carboxylic acid	0.108294	0.286098	0.183123	0.06617	0.253091	0.0385394	0.374645	0.0966988	0.122702	0.256176	0.0893548	0.281397
4	(3R)-4,4-Dimethyl-2-oxotetrahydro-3-furanyl beta-D-glucopyranoside	0.0312956	0.0128579	0.0407408	0.0358453	0.0528433	0.0373914	0.0362999	0.0381324	0.0874412	0.0108951	0.0136351	0.0471305
5	1-Aminocyclohexanecarboxylic acid	0.110716	0.150996	0.122736	0.1824	0.0859501	0.087192	0.0955427	0.126635	0.145955	0.120955	0.0763125	0.125291
6	1H-1,2,3-Triazol-4-ol	0.12871	0.0927694	0.0735301	0.0789587	0.0599963	0.111499	0.0990343	0.0926334	0.0965734	0.09276	0.0484672	0.0983863
7	2-(8-Hydroxy-4a,8-dimethyldecahydro-2-naphthalenyl)acrylic acid	0.0266806	0.0397342	0.0553458	0.0433722	0.0558401	0.119599	0.0191282	0.063288	0.0323447	0.0246048	0.0872822	0.0186329
8	2-(hydroxymethyl)-6-{5-[3-(hydroxymethyl)-5-(3-hydroxypropyl)-7-methoxy-2,3-dihydro-1-benzofuran-2-yl]-2-methoxyphenoxy}oxane-3,4,5-triol	0.13209	0.0672101	0.0534358	0.106151	0.0445177	0.0673193	0.246673	0.0573978	0.156168	0.128	0.132868	0.160522
9	2,4-Dimethylbenzaldehyde	0.0865994	0.0821071	0.120197	0.156312	0.10576	0.564519	0.201175	0.695808	0.129893	0.0796876	0.125767	0.102015
10	2-Amino-3-methoxybenzoic acid	0.0589455	0.0920774	0.102187	0.083246	0.0754863	0.100552	0.0709137	0.0982032	0.118128	0.0731041	0.081944	0.0705636
11	2-Aminophenol	0.0296116	0.0589744	0.028646	0.0813501	0.0606568	0.0518613	0.045592	0.015794	0.149582	0.0587338	0.0103264	0.0631389
12	2'-Deoxyadenosine	0.13387	0.0408459	0.0501896	0.0867751	0.0541802	0.0979091	0.132079	0.152957	0.128918	0.125837	0.324569	0.0383499
13	2-Hydroxycinnamic acid	0.583833	0.0520515	0.0771931	0.0829157	0.117875	0.0720457	0.262037	0.151938	0.107215	0.0770755	0.107081	0.12027
14	2-Hydroxyphenylalanine	0.0831466	0.0574976	0.0684978	0.0652584	0.0935269	0.102495	0.07009	0.105377	0.113674	0.107723	0.0611848	0.0968299
15	2-Hydroxyquinoline	0.0214541	0.0677687	0.0283888	0.0189457	0.0884524	0.0231967	0.0622013	0.0195077	0.0946354	0.0195682	0.0142195	0.103798
16	2-Picoline	0.0938182	0.106522	0.0859613	0.092522	0.086555	0.100243	0.0523021	0.0921561	0.130944	0.0992183	0.076069	0.0843571
17	2-Pyridylacetic acid	0.0151976	0.108561	0.0882734	0.0479036	0.0956318	0.0385106	0.12626	0.0641343	0.135159	0.102082	0.0506835	0.146381
18	3-(3,4-dihydroxyphenyl)propanoic acid	0.0636981	0.0468181	0.0512565	0.0885541	0.0562188	0.13725	0.0440196	0.0757574	0.0549661	0.0448742	0.0340922	0.03262
19	3-(3-methylbut-2-en-1-yl)-3H-purin-6-amine	0.112474	0.53081	0.0584992	0.134937	0.0415427	0.125116	0.0754973	0.116491	0.148075	0.102893	0.0120902	0.0805805
20	3-Indoleacetonitrile	0.109522	0.162665	0.0131784	0.095396	0.177575	0.112827	0.184004	0.103924	0.0345088	0.137445	0.0356387	0.161672
21	3-Methoxycinnamic acid	0.120545	0.0679978	0.0386697	0.0834837	0.0781217	0.130339	0.0713405	0.0776922	0.151848	0.0827113	0.175077	0.0899317
22	4-Aminobenzoic acid	0.101128	0.107888	0.102108	0.0945825	0.088212	0.104735	0.0941714	0.112849	0.139818	0.0989563	0.0911124	0.0935047
23	4-Guanidinobutyric acid	0.0841045	0.0427149	0.0977792	0.0884503	0.0886246	0.108602	0.115442	0.121613	0.109791	0.0792537	0.0948758	0.104155
24	4-Hydroxybenzaldehyde	0.0624463	0.0738631	0.0424582	0.0689507	0.0541123	0.142171	0.0210077	0.0635194	0.0559765	0.0505963	0.039864	0.0392393
25	4-Methoxybenzaldehyde	0.105583	0.0341995	0.0139186	0.0916266	0.0334102	0.0635249	0.102574	0.0409746	0.139584	0.147838	0.209184	0.0294903
26	5-Aminolevulinic acid	0.0500947	0.0452804	0.066327	0.0763272	0.0779278	0.135065	0.33828	0.062876	0.0828993	0.0378362	0.0303021	0.0855501
27	5-hydroxy-4-methoxy-5,6-dihydro-2H-pyran-2-one	0.0931516	0.111407	0.049577	0.0462829	0.099062	0.0601526	0.126655	0.0964376	0.062802	0.110316	0.074359	0.0735985
28	5'-S-Methyl-5'-thioadenosine	0.0636066	0.0608285	0.087992	0.0385803	0.0156649	0.0645612	0.0227969	0.078749	0.0848565	0.0401562	0.065874	0.0558667
29	7-Methylguanine	0.0686156	0.0635295	0.123697	0.132033	0.059489	0.0588226	0.644255	0.0833076	0.289354	0.0610871	0.180666	0.142279
30	Adenine	0.0830821	0.0972216	0.0717535	0.1109	0.0998742	0.10624	0.141942	0.128628	0.135277	0.119031	0.120366	0.110544
31	Adenosine	0.0669313	0.0650664	0.0826042	0.0884051	0.0500311	0.085495	0.081733	0.101186	0.149632	0.0618883	0.0686024	0.0733012
32	Allopurinol	0.0965232	0.291038	0.130432	0.0488519	0.250989	0.0759256	0.203365	0.115703	0.151929	0.1937	0.0740079	0.256099
33	alpha-D-Glucopyranosyl 2-O-(2-methylbutanoyl)-alpha-D-glucopyranoside	0.0732852	0.0791348	0.348869	0.200072	0.165122	0.24921	0.0945286	0.108554	0.119108	0.0363312	0.0515433	0.0388041
34	Apigenin	0.12374	0.196809	0.115593	0.0790589	0.100531	0.102322	0.166704	0.107309	0.147699	0.0864395	0.0854404	0.0660413
35	Asparagine	0.0432314	0.0368439	0.0544561	0.0457417	0.043933	0.0507229	0.0307376	0.0468895	0.0755289	0.0410145	0.0426459	0.0647107
36	Aspartame	0.118878	0.0373223	0.064091	0.0963019	0.153661	0.130985	0.0347609	0.0856241	0.0436068	0.0675462	0.0186718	0.0741629
37	Avicularin	0.0178147	0.0467089	0.0625185	0.0925978	0.0478375	0.0708287	0.0529559	0.0851238	0.0870214	0.0679116	0.0441257	0.0493892
38	Betaine	0.0981899	0.0516273	0.0714581	0.100779	0.118025	0.120585	0.1151	0.105704	0.0755546	0.0817556	0.0552164	0.134384
39	Bupirimate	0.086659	0.0477919	0.199045	0.0487702	0.12117	0.134002	0.0708374	0.160883	0.128158	0.106923	0.0495197	0.0630822
40	Cetrimonium	0.209523	0.057872	0.17438	0.110156	0.0690949	0.0920204	0.377227	0.125516	0.202201	0.0635894	0.093181	0.100797
41	Chlormequat	0.0518321	0.0600893	0.110247	0.0884106	0.0539092	0.130484	0.048189	0.109468	0.17126	0.0504363	0.0617396	0.0403327
42	Chlorogenic acid	0.126669	0.133836	0.0670149	0.0998673	0.0676091	0.132307	0.110237	0.157365	0.150026	0.110369	0.0822874	0.0813345
43	Choline	0.106941	0.0854459	0.121558	0.132285	0.172989	0.131416	0.126938	0.15771	0.164119	0.120383	0.12295	0.12971
44	Cyanidin	0.116439	0.0318874	0.0441979	0.0900121	0.0551803	0.0887659	0.0732356	0.0381352	0.14631	0.0836351	0.198859	0.0197056
45	D-(+)-Maltose	0.0719525	0.0479677	0.0489248	0.0539487	0.0507571	0.0712102	0.0583427	0.0635553	0.0710482	0.0504662	0.0597214	0.0480097
46	D-(+)-Proline	0.10527	0.0334582	0.0694641	0.0950393	0.103109	0.130489	0.106282	0.107037	0.100353	0.101748	0.0664468	0.0652848
47	D-(+)-Pyroglutamic Acid	0.0485758	0.0137028	0.0433805	0.053656	0.0488843	0.0783573	0.0338654	0.0394064	0.0416806	0.0404897	0.0263918	0.0354198
48	Difenoconazole	0.0860261	0.0526379	0.335372	0.0496771	0.0594432	0.158978	0.0453927	0.0898298	0.127276	0.118111	0.0205145	0.0759797
49	Dimethirimol	0.0992278	0.0403474	0.127386	0.107077	0.0188227	0.179619	0.0968449	0.0744496	0.0663851	0.112422	0.0542283	0.0424515
50	DL-Arginine	0.0137264	0.0421681	0.0726259	0.0849968	0.0923878	0.0482832	0.0291043	0.0737139	0.0580425	0.028227	0.0461897	0.128481
51	D-Raffinose	0.0252863	0.04474	0.0131848	0.0219622	0.0471522	0.0402117	0.0525165	0.0292264	0.0440166	0.0366627	0.0164168	0.0178226
52	D-Serine	0.0153843	0.0445495	0.0424519	0.0653569	0.0614131	0.0215499	0.011436	0.033528	0.0724788	0.0204692	0.0330926	0.0392796
53	Ecgonine methyl ester	0.074072	0.070279	0.115143	0.0890969	0.186411	0.0919354	0.168562	0.14837	0.0166236	0.0932467	0.090716	0.163643
54	Erucamide	0.164689	0.0278287	0.0871271	0.126328	0.133253	0.10439	0.0486286	0.0570197	0.0898416	0.0871181	0.093793	0.0757552
55	Ethylphthalyl ethylglycolate	0.0686428	0.027224	0.0581508	0.0625214	0.0455828	0.0766474	0.047027	0.082929	0.0491498	0.067464	0.0457632	0.0671986
56	Etoxazole	0.068443	0.049318	0.108525	0.067745	0.100151	0.212897	0.0796735	0.12935	0.1506	0.06349	0.0650578	0.0916092
57	Guanine	0.0799644	0.175075	0.155908	0.200812	0.153947	0.082144	0.0998891	0.113685	0.179555	0.111298	0.2453	0.183726
58	Isoleucine	0.0507879	0.0914755	0.088774	0.069509	0.0535976	0.074728	0.0566863	0.0772524	0.0948157	0.099473	0.144866	0.105065
59	L-(+)-Citrulline	0.0602186	0.143015	0.0948883	0.0806613	0.162399	0.0644312	0.114719	0.0706714	0.0981459	0.0726807	0.0735951	0.105696
60	Lactamide	0.0943165	0.0963773	0.0843196	0.0695501	0.0872399	0.0922759	0.0855483	0.081103	0.102238	0.0807746	0.0852103	0.100889
61	L-Cysteine	0.0227199	0.0260754	0.0270285	0.0448951	0.0548986	0.0540218	0.0288774	0.0283441	0.0549631	0.0231753	0.0252812	0.0152956
62	L-Ergothioneine	0.0768926	0.0830274	0.176968	0.0749554	0.0921079	0.163303	0.278527	0.0636315	0.171627	0.0678587	0.0531257	0.149858
63	L-Glutamine	0.0591318	0.102877	0.109181	0.141093	0.0421732	0.0614548	0.116875	0.0710985	0.0746097	0.0569181	0.124828	0.076519
64	L-Norleucine	0.105693	0.336545	0.122628	0.0886776	0.160443	0.0635532	0.359693	0.127748	0.162342	0.133151	0.121315	0.279824
65	L-Pyroglutamic acid	0.0669614	0.0933789	0.0554435	0.068269	0.103345	0.134403	0.0729886	0.0476158	0.131769	0.119617	0.104186	0.0534067
66	L-Threonine	0.0415131	0.0195311	0.0671688	0.0581381	0.0554722	0.0747973	0.033582	0.0508912	0.0909879	0.0347634	0.04813	0.045672
67	L-Tyrosine	0.0636981	0.0468181	0.0512565	0.0885541	0.0562188	0.13725	0.0440196	0.0757574	0.0549661	0.0448742	0.0340922	0.03262
68	L-Tyrosine methyl ester	0.126476	0.0291587	0.0794026	0.119252	0.0991254	0.123074	0.0704671	0.105983	0.118191	0.12355	0.0768004	0.112317
69	Melezitose	0.0239101	0.0389893	0.0407108	0.0353822	0.0347527	0.0383657	0.00958121	0.0386482	0.0163756	0.0314914	0.0137508	0.0210547
70	Methyl yellow	0.0768059	0.0607701	0.14656	0.11872	0.0260929	0.0997719	0.0505725	0.0599409	0.161455	0.102545	0.0205143	0.832395
71	Methylimidazoleacetic acid	0.0816687	0.0812528	0.107898	0.105087	0.0954554	0.0957153	0.107154	0.10838	0.13489	0.103327	0.115557	0.100435
72	Miquelianin	0.0461374	0.172586	0.0725802	0.0153711	0.145375	0.0434532	0.0974149	0.0281555	0.1336	0.0868097	0.0287986	0.131102
73	Myclobutanil	0.0625414	0.0607701	0.0602227	0.0509019	0.0260927	0.105468	0.0672738	0.0599407	0.127276	0.0945549	0.0205145	0.0382101
74	N6,N6,N6-Trimethyl-L-lysine	0.114754	0.034545	0.0595552	0.116092	0.0712895	0.0995296	0.0632411	0.0535593	0.0972905	0.0498096	0.0396765	0.086752
75	N6-Acetyl-L-lysine	0.0736415	0.0493793	0.0721068	0.0792075	0.0801615	0.109652	0.0867192	0.0777593	0.113098	0.0620166	0.0515927	0.0751175
76	N-Acetylputrescine	0.113866	0.1589	0.0893966	0.116718	0.0788593	0.127816	0.169489	0.137084	0.0876176	0.127667	0.0852455	0.0639968
77	Nicotinamide	0.0797563	0.101226	0.0505461	0.0600328	0.0581656	0.0661541	0.0552517	0.0570857	0.131488	0.062394	0.0874097	0.09167
78	Norepinephrine	0.0834432	0.0816977	0.088587	0.0879634	0.111135	0.118084	0.0829683	0.125232	0.123813	0.098398	0.0792265	0.0873998
79	Palmitic Acid	0.0818785	0.139497	0.122238	0.579443	0.0956613	0.11506	0.082831	0.0794711	0.21202	0.07951	0.171215	0.107268
80	Picolinic acid	0.0679774	0.216063	0.0973477	0.0736633	0.161154	0.0701861	0.166825	0.0929918	0.135751	0.0976578	0.0680317	0.218273
81	Pyraclostrobin	0.145349	0.0418018	0.0627032	0.0509412	0.112711	0.254565	0.0780884	0.173526	0.131918	0.0699613	0.284432	0.0877018
82	Pyrogallol	0.0905019	0.102363	0.0447719	0.0457777	0.0986053	0.0648871	0.116948	0.0931779	0.063122	0.107396	0.07245	0.06541
83	Spermine	0.214718	0.285628	0.148301	0.162501	0.288578	0.346071	0.201868	0.48407	0.169307	0.240284	0.121661	0.221132
84	Stearamide	0.104293	0.103169	0.0950821	0.0969125	0.128321	0.0847309	0.136156	0.071365	0.18784	0.111109	0.0373531	0.0773935
85	Taxifolin	0.0924409	0.147785	0.0313356	0.131105	0.151326	0.262648	0.183466	0.0906027	0.0864954	0.0595464	0.0585308	0.126092
86	Thymine	0.18567	0.129561	0.125779	0.0136288	0.0555768	0.0257653	0.399024	0.245774	0.105336	0.078141	0.0517957	0.366303
87	Tiliroside	0.115052	0.0337792	0.0927951	0.0882282	0.0878388	0.0558217	0.0846989	0.0921281	0.128456	0.159012	0.430331	0.0620255
88	trans-3-Indoleacrylic acid	0.0507302	0.0872224	0.0201677	0.0438804	0.102194	0.0711407	0.0742495	0.0416329	0.0297919	0.058781	0.0197566	0.108623
89	trans-Cinnamaldehyde	0.455073	0.409073	0.143391	0.075035	0.180778	0.21081	0.332339	0.0671059	0.179636	0.0536226	0.142479	0.245981
90	Tridemorph	0.114104	0.0899606	0.0787802	0.0770764	0.120698	0.0669399	0.10458	0.0584746	0.17829	0.0833271	0.0148766	0.0717189
91	Trifolin	0.125845	0.0446643	0.0630224	0.0901063	0.051828	0.0831685	0.0632345	0.0454733	0.137961	0.0404357	0.17366	0.119342
92	Trigonelline	0.0415275	0.0828361	0.143736	0.0758252	0.133177	0.0290707	0.037918	0.0707384	0.198646	0.094432	0.0563122	0.0484923
93	Uracil	0.0374928	1.00448	0.0886704	0.0653321	0.301271	0.0415295	0.275919	0.074389	0.206365	0.224161	0.0855241	0.342352
94	Valine	0.0622198	0.0556743	0.080773	0.0571316	0.114828	0.0662207	0.13369	0.0734097	0.113759	0.0875799	0.0770181	0.176382
95	Xanthurenic acid	0.119322	0.690864	0.166533	0.121254	0.258962	0.095108	0.454077	0.141777	0.231843	0.165629	0.208672	0.427549
96	2,2'-Methylenebis(4-methyl-6-tert-butylphenol)	0.0833765	0.0919129	0.0466012	0.105872	0.0690833	0.0295545	0.0979794	0.0857752	0.156942	0.0751697	0.0516718	0.0671547
97	Catechin	0.0162794	0.0216645	0.0291208	0.0916825	0.0609819	0.0169394	0.0138883	0.011668	0.0485929	0.0127872	0.023324	0.0448854
98	N-Acetyl-DL-glutamic acid	0.0153659	0.0329867	0.0478833	0.029285	0.0480506	0.0267279	0.0186019	0.0261024	0.0696838	0.0503773	0.0177007	0.0619819
99	Citric acid	0.123963	0.0466084	0.114822	0.0826476	0.160886	0.148502	0.0340661	0.0957738	0.138234	0.383273	0.135452	0.0534042
100	2-Isopropylmalic acid	0.286436	0.617087	0.120764	0.0674467	0.220132	0.240206	0.316735	0.226719	0.706571	0.271005	0.135592	0.474031
101	D-Saccharic acid	0.0204381	0.0567992	0.0402818	0.0335066	0.0816959	0.0470451	0.0524311	0.0104297	0.0759379	0.0451566	0.0602534	0.11422
102	L-Glutathione (reduced)	0.763926	0.602738	0.11183	0.461591	0.631361	0.296714	0.448272	0.398094	0.125471	0.851305	0.514578	0.55031
103	α-D-Mannose 1-phosphate	0.109243	0.0702733	0.0578285	0.0505454	0.154044	0.133587	0.0662119	0.0919651	0.0969992	0.121605	0.0980889	0.100196
104	Glutamic acid	0.0250974	0.0480297	0.0617546	0.0363357	0.091716	0.0265763	0.0160024	0.00970807	0.0693398	0.0431075	0.0323048	0.0777637
105	Ascorbic acid	0.0270202	0.0706129	0.0419021	0.049894	0.0862619	0.0244102	0.0289162	0.0190575	0.0809017	0.0437535	0.0227805	0.0982969
106	D-(-)-Glutamine	0.0182225	0.0411611	0.0232382	0.0442754	0.0626478	0.0125999	0.017964	0.00825639	0.0626399	0.0282042	0.0362923	0.0731018
107	D-Raffinose	0.128876	0.0933655	0.0350434	0.0602646	0.190727	0.0552779	0.0262105	0.163124	0.0503778	0.0286601	0.186865	0.0390417
108	DL-Tryptophan	0.0705279	0.0698848	0.105142	0.0901011	0.197719	0.0516433	0.0327746	0.0438536	0.185865	0.0828881	0.0690325	0.15495
109	Dodecyl sulfate	0.111035	0.134847	0.0879883	0.114882	0.139412	0.0325609	0.0998788	0.0400074	0.0814931	0.109079	0.0573363	0.259774
110	4-Dodecylbenzenesulfonic acid	0.269788	0.0813694	0.0952776	0.0321741	0.111998	0.0323524	0.0815484	0.0311269	0.11419	0.0414038	0.0677553	0.143454
111	Thymidine	0.00709377	0.0736153	0.019052	0.0461352	0.0505171	0.0317133	0.0967991	0.00958864	0.0618414	0.0886412	0.0316225	0.113174
112	(±)-Abscisic acid	0.0239352	0.0254577	0.0464311	0.0404349	0.0769816	0.0356321	0.0208604	0.0198459	0.0751782	0.0229104	0.0372778	0.0681038
113	Pantothenic acid	0.0218464	0.0390359	0.0387628	0.0375673	0.0838743	0.0282716	0.0276095	0.0223627	0.0351596	0.0287145	0.0413119	0.0388777
114	3-Hydroxy-3-methylglutaric acid	0.023061	0.055812	0.0388211	0.0449299	0.0735375	0.018729	0.0312339	0.0207195	0.107158	0.0274069	0.0418562	0.0758218
115	L-(-)-Malic acid	0.692973	0.0478021	0.807044	0.133886	0.872831	0.106015	0.623069	0.653244	1.06795	0.728711	0.207385	0.158797
116	Histidine	0.0281012	0.107197	0.092351	0.077612	0.0600036	0.0371367	0.137161	0.0679917	0.127106	0.089464	0.097833	0.113879
117	trans-Aconitic acid	0.087265	0.0739241	0.0609094	0.0384019	0.122677	0.0677132	0.0961709	0.0573376	0.0232559	0.123777	0.0587012	0.119487
118	2-Hydroxycaproic acid	0.0207176	0.0637548	0.0343565	0.0413075	0.117716	0.0224417	0.0253068	0.0181987	0.105898	0.0418003	0.0323127	0.104571
119	Cytidine	0.0285214	0.0357326	0.0389049	0.0441298	0.0583348	0.0314015	0.0190311	0.00527744	0.0621749	0.020855	0.0365182	0.0472102
120	Fludioxonil	0.0608449	0.076117	0.0790452	0.0889951	0.566658	0.0528052	0.117229	0.0181993	0.148526	0.103386	0.0637517	0.432543
121	Taurine	0.029312	0.0534441	0.053473	0.0373778	0.0999629	0.0266616	0.0276444	0.0205462	0.0780389	0.0369359	0.0280501	0.033157
122	Mevalonic acid	0.122869	0.0679695	0.0440558	0.0585176	0.11883	0.0131764	0.0202106	0.0247829	0.0776991	0.0550175	0.0687541	0.0898854
123	Phenylalanine	0.12561	0.0436483	0.031634	0.0637661	0.107759	0.0384323	0.0623395	0.0354206	0.086035	0.0201589	0.0806606	0.0969043
124	D-(-)-Quinic acid	0.0913098	0.216064	0.105452	0.0695867	0.0524464	0.216683	0.205205	0.116583	0.0532252	0.0937973	0.0776764	0.12648
125	Aspartic acid	0.0595529	0.0374258	0.0288031	0.0407422	0.107285	0.0434511	0.0162569	0.0210548	0.0975666	0.0302528	0.0484585	0.0797526
126	Gallic acid	0.03329	0.0430494	0.0557748	0.0856706	0.0578094	0.0783226	0.0352837	0.0270345	0.0658057	0.00732645	0.0348711	0.0674193
127	Salicylic acid	0.0198849	0.0267939	0.0564062	0.0284266	0.0449627	0.0435424	0.0329783	0.0286641	0.0486182	0.0401739	0.0103098	0.0575593
128	Citraconic acid	0.0210647	0.104214	0.0648929	0.0478949	0.0662905	0.0289724	0.0899279	0.0497972	0.0467053	0.0862585	0.0950585	0.0630717
129	2-Furoic acid	0.0258488	0.110989	0.0654002	0.0486387	0.0650213	0.0319334	0.088455	0.0472805	0.0449425	0.0902317	0.10392	0.0648924
130	O-Acetylserine	0.0223474	0.058137	0.0716949	0.0799364	0.12025	0.0395365	0.0251118	0.040381	0.0864566	0.0416047	0.0429371	0.0851202
131	(2R,3R,4S,5S,6R)-2-{[(2E,6R)-6-hydroxy-2,6-dimethylocta-2,7-dien-1-yl]oxy}-6-(hydroxymethyl)oxane-3,4,5-triol	0.133204	0.0265829	0.500859	0.0417316	0.0186133	0.13691	0.0657548	0.157888	0.0417356	0.0855121	0.134341	0.204129
132	(2S,3S,4S,5R,6S)-6-{[5,7-dihydroxy-2-(4-hydroxyphenyl)-4-oxo-4H-chromen-3-yl]oxy}-3,4,5-trihydroxyoxane-2-carboxylic acid	0.0254454	0.0778198	0.025071	0.0319353	0.0485305	0.0555528	0.134294	0.0433319	0.0436887	0.0250876	0.018736	0.0741906
133	10-Propoxydecanoic acid	0.0593153	0.0149778	0.144966	0.118842	0.0343431	0.165983	0.0701031	0.0940547	0.143332	0.110817	0.0661411	0.0443307
134	2-Aminoadipic acid	0.149634	0.086214	0.0347714	0.0637094	0.187057	0.03186	0.0492433	0.132655	0.0430229	0.0786471	0.0389485	0.0419482
135	4-Aminobiphenyl	0.048898	0.0492977	0.0627033	0.0509412	0.055417	0.101456	0.0780884	0.0763067	0.131918	0.066052	0.123015	0.0600666
136	Acetylarginine	0.099123	0.0504787	0.093569	0.0815004	0.220997	0.133401	0.504134	0.093354	0.106428	0.0662685	0.0827614	0.581687
137	S-Adenosylmethionine	0.0444302	0.073175	0.0354207	0.0416215	0.0554069	0.0577082	0.100265	0.0398626	0.0387879	0.0814853	0.0241656	0.0353413
138	Hexadecanamide	0.0908117	0.0862295	0.110521	0.0857324	0.125688	0.0756993	0.123605	0.0487515	0.158517	0.103219	0.0263396	0.0798759
139	cyanidin 3-glucoside	0.211068	0.194153	0.0953158	0.0696335	0.159127	0.043371	0.110854	0.0781957	0.1439	0.119109	0.0921508	0.154356
140	peonidin 3-glucoside	0.413601	0.119147	0.0807075	0.164972	0.144786	0.0946991	0.147336	0.0864528	0.130814	0.0882469	0.112167	0.0941245
141	γ-Aminobutyric acid (GABA)	2.12049	0.239141	0.102781	0.0954967	0.123311	0.0855294	0.559612	0.138087	0.111611	0.12461	0.0900257	0.175573
142	Nipecotic acid	0.0947783	0.0846743	0.0850086	0.0971673	0.0865588	0.115257	0.0970882	0.0972915	0.0841833	0.054039	0.0527244	0.0694286
