# Supplementary material for: Comparative Metabolomic Analysis of the Nutritional Aspects from Ten Cultivars of the Strawberry Fruit
Source: Foods. 2023 Mar 9;12(6):1153. doi: 10.3390/foods12061153 (PMC10048718; doi:10.3390/foods12061153)
Supplement: Supplementary file 1 [file foods-12-01153-s001.zip › Supplementary Materials 4-Table S3-revised.xlsx]

## Sheet: Sheet1
Blue stands for down-regulation; Pink stands for up-regulation
Positive Ion Mode																						Negative Ion Mode
FY vs BY		GD vs BY		HY1 vs BY		HY2 vs BY		HY3 vs BY		SDH vs BY		SZ vs BY		TZGZ vs BY		YX vs BY		YY vs BY		ZJ vs BY		FY vs BY		GD vs BY		HY1 vs BY		HY2 vs BY		HY3 vs BY		SDH vs BY		SZ vs BY		TZGZ vs BY		YX vs BY		YY vs BY		ZJ vs BY
1	Bupirimate	1	Bupirimate	1	D-(+)-Pyroglutamic Acid	1	Picolinic acid	1	Bupirimate	1	D-(+)-Pyroglutamic Acid	1	Bupirimate	1	Picolinic acid	1	Bupirimate	1	Bupirimate	1	Bupirimate	1	4-Dodecylbenzenesulfonic acid			1	2-Isopropylmalic acid	1	N-Acetyl-DL-glutamic acid	1	N-Acetyl-DL-glutamic acid	1	N-Acetyl-DL-glutamic acid	1	Catechin	1	N-Acetyl-DL-glutamic acid	1	Taurine	1	N-Acetyl-DL-glutamic acid	1	2-Isopropylmalic acid
2	Etoxazole	2	Miquelianin	2	Miquelianin	2	Bupirimate	2	Etoxazole	2	Miquelianin	2	Etoxazole	2	Bupirimate	2	Nicotinamide	2	Etoxazole	2	Etoxazole	2	Taurine	1	N-Acetyl-DL-glutamic acid	2	Mevalonic acid	2	2-Isopropylmalic acid	2	Gallic acid	2	2-Isopropylmalic acid	2	2-Isopropylmalic acid	2	2-Isopropylmalic acid	2	Mevalonic acid	2	2-Isopropylmalic acid	2	4-Dodecylbenzenesulfonic acid
3	Methyl yellow	3	Dimethirimol	3	Norepinephrine	3	Etoxazole	3	Methyl yellow	3	D-(+)-Maltose	3	Methyl yellow	3	Trigonelline	3	Miquelianin	3	Methyl yellow	3	Methyl yellow	3	Mevalonic acid	2	4-Dodecylbenzenesulfonic acid	3	Gallic acid	3	4-Dodecylbenzenesulfonic acid	1	D-(-)-Glutamine	3	4-Dodecylbenzenesulfonic acid	3	D-(-)-Glutamine	3	DL-Tryptophan	3	Gallic acid	3	D-(-)-Glutamine	3	Taurine
4	Trigonelline	4	Guanine	4	Dimethirimol	4	Methyl yellow	4	Miquelianin	4	Dimethirimol	4	Nicotinamide	4	Norepinephrine	4	Dimethirimol	4	Nicotinamide	4	Nicotinamide	4	Citraconic acid	3	Taurine	4	O-Acetylserine	4	Taurine	2	DL-Tryptophan	4	trans-Aconitic acid	4	Dodecyl sulfate	4	2-Hydroxycaproic acid	1	D-(-)-Glutamine	4	DL-Tryptophan	4	Mevalonic acid
5	Miquelianin	5	Methylimidazoleacetic acid	5	Guanine	5	Miquelianin	5	Dimethirimol	5	Guanine	5	Miquelianin	5	Dimethirimol	5	Guanine	5	D-(+)-Maltose	5	Miquelianin	5	O-Acetylserine	4	O-Acetylserine	1	D-(-)-Glutamine	5	Mevalonic acid	3	Dodecyl sulfate	5	Cytidine	5	(±)-Abscisic acid	5	Taurine	2	Thymidine	5	(±)-Abscisic acid	1	D-(-)-Glutamine
6	Dimethirimol	6	L-(+)-Citrulline	6	Methylimidazoleacetic acid	6	Norepinephrine	6	Guanine	6	Methylimidazoleacetic acid	6	Norepinephrine	6	Methylimidazoleacetic acid	6	Myclobutanil	6	Dimethirimol	6	Norepinephrine	1	Catechin	1	Catechin	2	D-Raffinose	6	Gallic acid	4	Thymidine	6	Mevalonic acid	6	3-Hydroxy-3-methylglutaric acid	6	Mevalonic acid	3	(±)-Abscisic acid	6	3-Hydroxy-3-methylglutaric acid	2	(±)-Abscisic acid
7	Myclobutanil	7	Myclobutanil	7	L-(+)-Citrulline	7	Dimethirimol	7	Methylimidazoleacetic acid	7	Myclobutanil	7	Dimethirimol	7	Myclobutanil	7	Ecgonine methyl ester	7	Guanine	7	Dimethirimol	2	D-(-)-Glutamine	2	D-(-)-Glutamine	3	Thymidine	7	O-Acetylserine	5	(±)-Abscisic acid	7	O-Acetylserine	7	Histidine	7	O-Acetylserine	4	Pantothenic acid	7	Histidine	3	Histidine
8	Ecgonine methyl ester	8	Pyraclostrobin	8	Myclobutanil	8	Guanine	8	Chlormequat	8	Ecgonine methyl ester	8	Guanine	8	Ecgonine methyl ester	8	Pyraclostrobin	8	Methylimidazoleacetic acid	8	Guanine	3	Thymidine	3	Thymidine	4	Histidine	1	Thymidine	6	Histidine	1	D-(-)-Glutamine	8	Apigenin	1	D-(-)-Glutamine	5	3-Hydroxy-3-methylglutaric acid	8	Apigenin	4	Apigenin
9	Chlormequat	9	Chlormequat	9	Pyraclostrobin	9	Methylimidazoleacetic acid	9	Taxifolin	9	Pyraclostrobin	9	Myclobutanil	9	Pyraclostrobin	9	Chlormequat	9	Myclobutanil	9	Myclobutanil	4	(±)-Abscisic acid	4	3-Hydroxy-3-methylglutaric acid	5	Apigenin	2	Apigenin	7	Apigenin	2	(±)-Abscisic acid	9	2-Hydroxycaproic acid	2	Thymidine	6	Histidine	9	2-Hydroxycaproic acid	5	Phenylalanine
10	L-Ergothioneine	10	L-Ergothioneine	10	Chlormequat	10	L-(+)-Citrulline	10	alpha-D-Glucopyranosyl 2-O-(2-methylbutanoyl)-alpha-D-glucopyranoside	10	Chlormequat	10	Ecgonine methyl ester	10	Chlormequat	10	L-Ergothioneine	10	Ecgonine methyl ester	10	Ecgonine methyl ester	5	Histidine	5	Histidine	6	Fludioxonil	3	Asparagine	8	2-Hydroxycaproic acid	3	3-Hydroxy-3-methylglutaric acid	10	Phenylalanine	3	(±)-Abscisic acid	7	Apigenin	10	Cytidine	6	Asparagine
11	Taxifolin	11	2-(hydroxymethyl)-6-{5-[3-(hydroxymethyl)-5-(3-hydroxypropyl)-7-methoxy-2,3-dihydro-1-benzofuran-2-yl]-2-methoxyphenoxy}oxane-3,4,5-triol	11	Taxifolin	11	Myclobutanil	11	Avicularin	11	L-Ergothioneine	11	L-Ergothioneine	11	L-Ergothioneine	11	Taxifolin	11	L-Ergothioneine	11	Cyanidin	6	Phenylalanine	6	Apigenin	7	Taurine			9	Taurine	4	Histidine	11	Aspartic acid	4	Histidine	8	Fludioxonil	11	Phenylalanine	7	Salicylic acid
12	2-Hydroxycinnamic acid	12	alpha-D-Glucopyranosyl 2-O-(2-methylbutanoyl)-alpha-D-glucopyranoside	12	2-(hydroxymethyl)-6-{5-[3-(hydroxymethyl)-5-(3-hydroxypropyl)-7-methoxy-2,3-dihydro-1-benzofuran-2-yl]-2-methoxyphenoxy}oxane-3,4,5-triol	12	Ecgonine methyl ester	12	10-Propoxydecanoic acid	12	Taxifolin	12	Taxifolin	12	Taxifolin	12	(2R,3S,4S,5R,6R)-5-{[(2S,3R,4R)-3,4-dihydroxy-4-(hydroxymethyl)oxolan-2-yl]oxy}-2-(hydroxymethyl)-6-[2-(4-hydroxyphenyl)ethoxy]oxane-3,4-diol	12	Taxifolin	12	Chlormequat	7	Aspartic acid	7	Cytidine	8	Phenylalanine			10	Phenylalanine	5	Apigenin	12	Asparagine	5	Apigenin	9	Phenylalanine	12	Aspartic acid
13	2-Pyridylacetic acid	13	Avicularin	13	2-(hydroxymethyl)-6-{5-[3-(hydroxymethyl)-5-(3-hydroxypropyl)-7-methoxy-2,3-dihydro-1-benzofuran-2-yl]-2-methoxyphenoxy}oxane-3,4,5-triol	13	Chlormequat	1	L-Glutamine	13	(2S,3S,4S,5R,6R)-6-[3-(benzoyloxy)-2-hydroxypropoxy]-3,4,5-trihydroxyoxane-2-carboxylic acid	13	(3R)-4,4-Dimethyl-2-oxotetrahydro-3-furanyl beta-D-glucopyranoside	13	2-(hydroxymethyl)-6-{5-[3-(hydroxymethyl)-5-(3-hydroxypropyl)-7-methoxy-2,3-dihydro-1-benzofuran-2-yl]-2-methoxyphenoxy}oxane-3,4,5-triol	13	2-(hydroxymethyl)-6-{5-[3-(hydroxymethyl)-5-(3-hydroxypropyl)-7-methoxy-2,3-dihydro-1-benzofuran-2-yl]-2-methoxyphenoxy}oxane-3,4,5-triol	13	(2R,3S,4S,5R,6R)-5-{[(2S,3R,4R)-3,4-dihydroxy-4-(hydroxymethyl)oxolan-2-yl]oxy}-2-(hydroxymethyl)-6-[2-(4-hydroxyphenyl)ethoxy]oxane-3,4-diol	13	L-Ergothioneine	8	Asparagine	8	Phenylalanine	9	Aspartic acid			11	Asparagine	6	Fludioxonil	13	Salicylic acid	6	Fludioxonil	10	Asparagine	13	Asparagine
14	alpha-D-Glucopyranosyl 2-O-(2-methylbutanoyl)-alpha-D-glucopyranoside	14	10-Propoxydecanoic acid	14	2-Hydroxyquinoline	14	L-Ergothioneine	2	D-(+)-Proline	14	2-(hydroxymethyl)-6-{5-[3-(hydroxymethyl)-5-(3-hydroxypropyl)-7-methoxy-2,3-dihydro-1-benzofuran-2-yl]-2-methoxyphenoxy}oxane-3,4,5-triol	14	3-(3-methylbut-2-en-1-yl)-3H-purin-6-amine	14	2-Pyridylacetic acid	14	2-Pyridylacetic acid	14	2-(hydroxymethyl)-6-{5-[3-(hydroxymethyl)-5-(3-hydroxypropyl)-7-methoxy-2,3-dihydro-1-benzofuran-2-yl]-2-methoxyphenoxy}oxane-3,4,5-triol	14	Taxifolin	9	Salicylic acid	9	Aspartic acid							7	Phenylalanine			7	Phenylalanine	11	O-Acetylserine	14	O-Acetylserine
15	Avicularin	15	4-Aminobiphenyl	15	Adenine	15	Chlorogenic acid	3	Valine	15	2-(hydroxymethyl)-6-{5-[3-(hydroxymethyl)-5-(3-hydroxypropyl)-7-methoxy-2,3-dihydro-1-benzofuran-2-yl]-2-methoxyphenoxy}oxane-3,4,5-triol	15	Adenine	15	alpha-D-Glucopyranosyl 2-O-(2-methylbutanoyl)-alpha-D-glucopyranoside	15	alpha-D-Glucopyranosyl 2-O-(2-methylbutanoyl)-alpha-D-glucopyranoside	15	Adenine	15	2-Pyridylacetic acid			10	Asparagine							8	Aspartic acid			8	Asparagine
16	(2S,3S,4S,5R,6S)-6-{[5,7-dihydroxy-2-(4-hydroxyphenyl)-4-oxo-4H-chromen-3-yl]oxy}-3,4,5-trihydroxyoxane-2-carboxylic acid	1	L-Glutamine	16	alpha-D-Glucopyranosyl 2-O-(2-methylbutanoyl)-alpha-D-glucopyranoside	16	Taxifolin	4	Lactamide	16	2-Hydroxyquinoline	16	alpha-D-Glucopyranosyl 2-O-(2-methylbutanoyl)-alpha-D-glucopyranoside	16	Avicularin	16	Avicularin	16	Adenosine	16	alpha-D-Glucopyranosyl 2-O-(2-methylbutanoyl)-alpha-D-glucopyranoside			11	Salicylic acid							9	Asparagine			9	Salicylic acid
17	10-Propoxydecanoic acid	2	D-(+)-Proline	17	Avicularin	17	2-(hydroxymethyl)-6-{5-[3-(hydroxymethyl)-5-(3-hydroxypropyl)-7-methoxy-2,3-dihydro-1-benzofuran-2-yl]-2-methoxyphenoxy}oxane-3,4,5-triol	5	L-Threonine	17	2-Pyridylacetic acid	17	Avicularin	17	10-Propoxydecanoic acid	17	4-Aminobiphenyl	17	Allopurinol	17	Avicularin											10	Gallic acid
18	4-Aminobiphenyl	3	Valine	18	10-Propoxydecanoic acid	18	2-(hydroxymethyl)-6-{5-[3-(hydroxymethyl)-5-(3-hydroxypropyl)-7-methoxy-2,3-dihydro-1-benzofuran-2-yl]-2-methoxyphenoxy}oxane-3,4,5-triol	6	Isoleucine	18	Adenine	18	10-Propoxydecanoic acid	18	4-Aminobiphenyl	1	D-(+)-Proline	18	alpha-D-Glucopyranosyl 2-O-(2-methylbutanoyl)-alpha-D-glucopyranoside	18	10-Propoxydecanoic acid											11	Salicylic acid
19	S-Adenosylmethionine	4	L-Tyrosine	19	4-Aminobiphenyl	19	2-Hydroxyquinoline	7	trans-3-Indoleacrylic acid	19	alpha-D-Glucopyranosyl 2-O-(2-methylbutanoyl)-alpha-D-glucopyranoside	19	4-Aminobiphenyl	1	L-Glutamine	2	L-Tyrosine	19	Avicularin	19	4-Aminobiphenyl
1	Choline	5	Phenylalanine	1	L-Glutamine	20	2-Pyridylacetic acid	8	Histidine	20	Avicularin	1	Choline	2	D-(+)-Proline	3	trans-Cinnamaldehyde	20	10-Propoxydecanoic acid	1	L-Threonine
2	DL-Arginine	6	L-Threonine	2	D-(+)-Proline	21	alpha-D-Glucopyranosyl 2-O-(2-methylbutanoyl)-alpha-D-glucopyranoside	9	Trigonelline	21	4-Aminobiphenyl	2	L-Glutamine	3	Valine	4	Etoxazole	21	4-Aminobiphenyl	2	trans-Cinnamaldehyde
3	Difenoconazole	7	trans-Cinnamaldehyde	3	Valine	22	Avicularin	10	Difenoconazole	1	L-Glutamine	3	D-(+)-Proline	4	Lactamide	5	Isoleucine	1	L-Glutamine	3	Isoleucine
4	Tiliroside	8	Isoleucine	4	Etoxazole	23	10-Propoxydecanoic acid	11	Tiliroside	2	Valine	4	L-Tyrosine	5	L-Tyrosine	6	DL-Arginine	2	L-Norleucine	4	Histidine
5	L-Cysteine	9	DL-Arginine	5	Isoleucine	24	4-Aminobiphenyl	12	N6,N6,N6-Trimethyl-L-lysine	3	L-Tyrosine	5	trans-Cinnamaldehyde	6	L-Threonine	7	Methyl yellow	3	Lactamide	5	Trigonelline
6	Trifolin	10	Histidine	6	Methyl yellow	1	Valine	13	L-Cysteine	4	Phenylalanine	6	D-(+)-Pyroglutamic Acid	7	trans-Cinnamaldehyde	8	Histidine	4	L-Tyrosine	6	Difenoconazole
7	Pyraclostrobin	11	Tiliroside	7	Histidine	2	Difenoconazole	14	Trifolin	5	L-Threonine	7	Histidine	8	Etoxazole	9	Tiliroside	5	L-Threonine	7	N-Acetylputrescine
8	Cyanidin	12	N6,N6,N6-Trimethyl-L-lysine	8	Difenoconazole	3	Tiliroside	15	Thymine	6	trans-Cinnamaldehyde	8	Tiliroside	9	Isoleucine	10	(2E)-3-(2-{[(2S,3R,4S,5S,6R)-3,4,5-trihydroxy-6-(hydroxymethyl)oxan-2-yl]oxy}phenyl)prop-2-enoic acid	6	trans-Cinnamaldehyde	8	Pyraclostrobin
9	Chlorogenic acid	13	L-Tyrosine methyl ester	9	Tiliroside	4	Erucamide	16	Cyanidin	7	Etoxazole	9	N-Acetylputrescine	10	DL-Arginine	11	1-Aminocyclohexanecarboxylic acid	7	Isoleucine	9	1H-1,2,3-Triazol-4-ol
10	L-Tyrosine methyl ester	14	(2E)-3-(2-{[(2S,3R,4S,5S,6R)-3,4,5-trihydroxy-6-(hydroxymethyl)oxan-2-yl]oxy}phenyl)prop-2-enoic acid	10	L-Cysteine	5	Thymine	17	L-Tyrosine methyl ester	8	Isoleucine	10	Pyraclostrobin	11	Methyl yellow	12	2-Amino-3-methoxybenzoic acid	8	DL-Arginine	10	2-Aminophenol
11	(2E)-3-(2-{[(2S,3R,4S,5S,6R)-3,4,5-trihydroxy-6-(hydroxymethyl)oxan-2-yl]oxy}phenyl)prop-2-enoic acid	15	1-Aminocyclohexanecarboxylic acid	11	Trifolin	6	Pyraclostrobin	18	(2E)-3-(2-{[(2S,3R,4S,5S,6R)-3,4,5-trihydroxy-6-(hydroxymethyl)oxan-2-yl]oxy}phenyl)prop-2-enoic acid	9	DL-Arginine	11	L-Tyrosine methyl ester	12	Histidine	13	2-Aminophenol	9	D-(+)-Pyroglutamic Acid	11	2'-Deoxyadenosine
12	(2R,3S,4S,5R,6R)-5-{[(2S,3R,4R)-3,4-dihydroxy-4-(hydroxymethyl)oxolan-2-yl]oxy}-2-(hydroxymethyl)-6-[2-(4-hydroxyphenyl)ethoxy]oxane-3,4-diol	16	2-(8-Hydroxy-4a,8-dimethyldecahydro-2-naphthalenyl)acrylic acid	12	Cyanidin	7	1H-1,2,3-Triazol-4-ol	19	1-Aminocyclohexanecarboxylic acid	10	Methyl yellow	12	(2R,3S,4S,5R,6R)-5-{[(2S,3R,4R)-3,4-dihydroxy-4-(hydroxymethyl)oxolan-2-yl]oxy}-2-(hydroxymethyl)-6-[2-(4-hydroxyphenyl)ethoxy]oxane-3,4-diol	13	Tiliroside	14	2'-Deoxyadenosine	10	Histidine	12	2-Hydroxycinnamic acid
13	1-Aminocyclohexanecarboxylic acid	17	2-Amino-3-methoxybenzoic acid	13	L-Ergothioneine	8	2'-Deoxyadenosine	20	2-Amino-3-methoxybenzoic acid	11	Histidine	13	1-Aminocyclohexanecarboxylic acid	14	L-Cysteine	15	2-Hydroxycinnamic acid	11	Trigonelline	13	3-(3-methylbut-2-en-1-yl)-3H-purin-6-amine
14	1H-1,2,3-Triazol-4-ol	18	2'-Deoxyadenosine	14	Cetrimonium	9	2-Hydroxycinnamic acid	21	2-Aminophenol	12	Difenoconazole	14	2-Aminophenol	15	Chlorogenic acid	16	3-(3,4-dihydroxyphenyl)propanoic acid	12	Tiliroside	14	5'-S-Methyl-5'-thioadenosine
15	2-(8-Hydroxy-4a,8-dimethyldecahydro-2-naphthalenyl)acrylic acid	19	2-Hydroxycinnamic acid	15	(2E)-3-(2-{[(2S,3R,4S,5S,6R)-3,4,5-trihydroxy-6-(hydroxymethyl)oxan-2-yl]oxy}phenyl)prop-2-enoic acid	10	3-(3-methylbut-2-en-1-yl)-3H-purin-6-amine	22	2'-Deoxyadenosine	13	Tiliroside	15	2-Hydroxycinnamic acid	16	(2E)-3-(2-{[(2S,3R,4S,5S,6R)-3,4,5-trihydroxy-6-(hydroxymethyl)oxan-2-yl]oxy}phenyl)prop-2-enoic acid	17	3-(3-methylbut-2-en-1-yl)-3H-purin-6-amine	13	N6,N6,N6-Trimethyl-L-lysine	15	Apigenin
16	2-(hydroxymethyl)-6-{5-[3-(hydroxymethyl)-5-(3-hydroxypropyl)-7-methoxy-2,3-dihydro-1-benzofuran-2-yl]-2-methoxyphenoxy}oxane-3,4,5-triol	20	3-(3,4-dihydroxyphenyl)propanoic acid	16	2'-Deoxyadenosine	11	5'-S-Methyl-5'-thioadenosine	23	2-Hydroxycinnamic acid	14	N6,N6,N6-Trimethyl-L-lysine	16	2-Pyridylacetic acid	17	2'-Deoxyadenosine	18	4-Hydroxybenzaldehyde	14	N6-Acetyl-L-lysine	16	Aspartame
17	2-Amino-3-methoxybenzoic acid	21	3-(3-methylbut-2-en-1-yl)-3H-purin-6-amine	17	2-Hydroxycinnamic acid	12	Adenine	24	2-Picoline	15	Erucamide	17	3-(3,4-dihydroxyphenyl)propanoic acid	18	2-Hydroxycinnamic acid	19	5'-S-Methyl-5'-thioadenosine	15	N-Acetylputrescine	17	2-Aminoadipic acid
18	2'-Deoxyadenosine	22	4-Guanidinobutyric acid	18	3-(3-methylbut-2-en-1-yl)-3H-purin-6-amine	13	Apigenin	25	2-Pyridylacetic acid	16	N-Acetylputrescine	18	4-Hydroxybenzaldehyde	19	3-(3,4-dihydroxyphenyl)propanoic acid	20	Apigenin	16	Trifolin	18	cyanidin 3-glucoside
19	3-Methoxycinnamic acid	23	4-Hydroxybenzaldehyde	19	5'-S-Methyl-5'-thioadenosine	14	Asparagine	26	3-(3-methylbut-2-en-1-yl)-3H-purin-6-amine	17	L-Cysteine	19	5'-S-Methyl-5'-thioadenosine	20	3-(3-methylbut-2-en-1-yl)-3H-purin-6-amine	21	Aspartame	17	Cyanidin	19	peonidin 3-glucoside
20	4-Methoxybenzaldehyde	24	5'-S-Methyl-5'-thioadenosine	20	Apigenin	15	Betaine	27	3-Indoleacetonitrile	18	L-Tyrosine methyl ester	20	Apigenin	21	4-Hydroxybenzaldehyde	22	Betaine	18	L-Tyrosine methyl ester	20	Nipecotic acid
21	Adenine	25	Allopurinol	21	Aspartame	16	(2R,3R,4S,5S,6R)-2-{[(2E,6R)-6-hydroxy-2,6-dimethylocta-2,7-dien-1-yl]oxy}-6-(hydroxymethyl)oxane-3,4,5-triol	28	4-Aminobenzoic acid	19	(2E)-3-(2-{[(2S,3R,4S,5S,6R)-3,4,5-trihydroxy-6-(hydroxymethyl)oxan-2-yl]oxy}phenyl)prop-2-enoic acid	21	Asparagine	22	4-Methoxybenzaldehyde	23	cyanidin 3-glucoside	19	Ethylphthalyl ethylglycolate
22	Asparagine	26	Apigenin	22	2-Aminoadipic acid	17	cyanidin 3-glucoside	29	4-Guanidinobutyric acid	20	2'-Deoxyadenosine	22	Aspartame	23	5'-S-Methyl-5'-thioadenosine	24	peonidin 3-glucoside	20	(2E)-3-(2-{[(2S,3R,4S,5S,6R)-3,4,5-trihydroxy-6-(hydroxymethyl)oxan-2-yl]oxy}phenyl)prop-2-enoic acid
23	Betaine	27	Asparagine	23	cyanidin 3-glucoside	18	peonidin 3-glucoside	30	4-Methoxybenzaldehyde	21	2-Hydroxycinnamic acid	23	(2R,3R,4S,5S,6R)-2-{[(2E,6R)-6-hydroxy-2,6-dimethylocta-2,7-dien-1-yl]oxy}-6-(hydroxymethyl)oxane-3,4,5-triol	24	Apigenin	25	Nipecotic acid	21	1-Aminocyclohexanecarboxylic acid
24	(2R,3R,4S,5S,6R)-2-{[(2E,6R)-6-hydroxy-2,6-dimethylocta-2,7-dien-1-yl]oxy}-6-(hydroxymethyl)oxane-3,4,5-triol	28	Aspartame	24	peonidin 3-glucoside			31	5-Aminolevulinic acid	22	3-(3,4-dihydroxyphenyl)propanoic acid	24	Acetylarginine	25	Asparagine			22	2-Aminophenol
25	cyanidin 3-glucoside	29	Betaine					32	5'-S-Methyl-5'-thioadenosine	23	3-(3-methylbut-2-en-1-yl)-3H-purin-6-amine	25	cyanidin 3-glucoside	26	Aspartame			23	2-Picoline
26	peonidin 3-glucoside	30	cyanidin 3-glucoside					33	Adenosine	24	3-Indoleacetonitrile	26	peonidin 3-glucoside	27	Betaine			24	3-(3,4-dihydroxyphenyl)propanoic acid
27	Nipecotic acid	31	peonidin 3-glucoside					34	Allopurinol	25	4-Hydroxybenzaldehyde			28	(2R,3R,4S,5S,6R)-2-{[(2E,6R)-6-hydroxy-2,6-dimethylocta-2,7-dien-1-yl]oxy}-6-(hydroxymethyl)oxane-3,4,5-triol			25	3-(3-methylbut-2-en-1-yl)-3H-purin-6-amine
		32	Nipecotic acid					35	Apigenin	26	5'-S-Methyl-5'-thioadenosine			29	cyanidin 3-glucoside			26	4-Aminobenzoic acid
								36	Asparagine	27	Apigenin			30	peonidin 3-glucoside			27	4-Guanidinobutyric acid
								37	Aspartame	28	Asparagine			31	Nipecotic acid			28	4-Hydroxybenzaldehyde
								38	4-Aminobiphenyl	29	Aspartame							29	5'-S-Methyl-5'-thioadenosine
								39	2-Aminoadipic acid	30	(2R,3R,4S,5S,6R)-2-{[(2E,6R)-6-hydroxy-2,6-dimethylocta-2,7-dien-1-yl]oxy}-6-(hydroxymethyl)oxane-3,4,5-triol							30	Apigenin
								40	cyanidin 3-glucoside	31	cyanidin 3-glucoside							31	Asparagine
								41	peonidin 3-glucoside	32	peonidin 3-glucoside							32	Aspartame
								42	Nipecotic acid									33	Betaine
																		34	Acetylarginine
																		35	cyanidin 3-glucoside
																		36	peonidin 3-glucoside
																		37	Nipecotic acid
